# Supplementary material for: Lumican inhibits immune escape and carcinogenic pathways in colorectal adenocarcinoma
Source: Aging (Albany NY). 2021 Jan 20;13(3):4388–408. doi: 10.18632/aging.202401 (PMC7906189; doi:10.18632/aging.202401)
Supplement: Supplementary Table 1 [file aging-13-202401-s002.xlsx]

## Sheet: Sheet1
Supplementary Table 1. Prognostic results in COAD obtained from the PrognoScan.
DATASET	CANCER TYPE	SUBTYPE	ENDPOINT	COHORT	CONTRIBUTOR	ARRAY TYPE	PROBE ID	N	CUTPOINT	MINIMUM P-VALUE	CORRECTED P-VALUE	ln(HRhigh / HRlow)	COX P-VALUE	ln(HR)	HR [95% CIlow- CIupp]
GSE12945	Colorectal cancer		Disease Free Survival	Berlin	Staub	HG-U133A	201744_s_at	51	0.41	0.05609	-	15.93	0.7709	0.11	1.11 [0.54 - 2.29]
GSE12945	Colorectal cancer		Overall Survival	Berlin	Staub	HG-U133A	201744_s_at	62	0.84	0.054427	-	1.12	0.440292	0.17	1.19 [0.77 - 1.83]
GSE17536	Colorectal cancer		Overall Survival	MCC	Smith	HG-U133_Plus_2	201744_s_at	177	0.11	0.015855	0.226948	1.32	0.049165	0.51	1.67 [1.00 - 2.79]
GSE17536	Colorectal cancer		Disease Free Survival	MCC	Smith	HG-U133_Plus_2	201744_s_at	145	0.4	0.039956	0.427378	0.77	0.116433	0.6	1.82 [0.86 - 3.86]
GSE17536	Colorectal cancer		Disease Specific Survival	MCC	Smith	HG-U133_Plus_2	201744_s_at	177	0.42	0.004488	0.086903	0.85	0.009512	0.83	2.29 [1.22 - 4.29]
GSE14333	Colorectal cancer		Disease Free Survival	Melbourne	Jorissen	HG-U133_Plus_2	201744_s_at	226	0.75	0.013138	0.197845	0.7	0.067301	0.54	1.71 [0.96 - 3.06]
GSE17537	Colorectal cancer		Disease Free Survival	VMC	Smith	HG-U133_Plus_2	201744_s_at	55	0.65	0.03572	0.397567	0.97	0.42041	0.21	1.23 [0.74 - 2.05]
GSE17537	Colorectal cancer		Disease Specific Survival	VMC	Smith	HG-U133_Plus_2	201744_s_at	49	0.65	0.064879	-	1.04	0.632966	0.15	1.16 [0.63 - 2.14]
GSE17537	Colorectal cancer		Overall Survival	VMC	Smith	HG-U133_Plus_2	201744_s_at	55	0.44	0.040745	0.432738	1.01	0.382861	0.21	1.23 [0.77 - 1.96]
