# Supplementary material for: Lumican inhibits immune escape and carcinogenic pathways in colorectal adenocarcinoma
Source: Aging (Albany NY). 2021 Jan 20;13(3):4388–408. doi: 10.18632/aging.202401 (PMC7906189; doi:10.18632/aging.202401)
Supplement: Supplementary Table 3 [file aging-13-202401-s004.xlsx]

## Sheet: Sheet1
Supplementary Table 3. Results of LUM coexpression gene in COAD.
Query	Statistic	P-value	FDR (BH)	Event_SD	Event_TD
A1CF	-0.0686388	0.484474	0.587803	106	106
A2M	0.200036	0.0397912	0.0788919	106	106
A4GALT	0.619507	1.44518e-12	4.7291e-11	106	106
AAAS	-0.0561188	0.567743	0.66466	106	106
AACS	-0.265849	0.00588035	0.0162757	106	106
AADACP1	-0.059171	0.546836	0.645969	106	106
AADAT	-0.133214	0.173406	0.262888	106	106
AAED1	0.500228	4.76421e-08	7.07391e-07	106	106
AAGAB	0.211458	0.0295595	0.0618341	106	106
AAK1	-0.249868	0.0097902	0.0249889	106	106
AAMDC	0.22675	0.019419	0.0438245	106	106
AAMP	-0.334014	0.000466706	0.00193247	106	106
AAR2	0.0260723	0.790784	0.848036	106	106
AARS	-0.292751	0.0023242	0.00743414	106	106
AARS2	-0.454694	9.76246e-07	1.01244e-05	106	106
AARSD1	0.160011	0.101326	0.170122	106	106
AASDH	0.176244	0.0707304	0.127502	106	106
AASDHPPT	0.233908	0.0158106	0.0370195	106	106
AASS	0.146197	0.134811	0.214812	106	106
AATF	-0.392263	3.20121e-05	0.000199686	106	106
ABALON	0.0632596	0.519432	0.620612	106	106
ABAT	-0.0251914	0.797699	0.853515	106	106
ABCA1	0.370587	9.21534e-05	0.000492239	106	106
ABCA11P	-0.0340596	0.728886	0.799255	106	106
ABCA2	-0.368228	0.000102937	0.000541257	106	106
ABCA5	-0.208691	0.0318074	0.0657005	106	106
ABCA7	-0.271176	0.00492784	0.0140163	106	106
ABCB1	0.155657	0.11109	0.183701	106	106
ABCB10	-0.0854951	0.383543	0.492142	106	106
ABCB6	-0.303542	0.00156106	0.00531469	106	106
ABCB7	0.0616285	0.530281	0.631168	106	106
ABCB8	-0.227376	0.0190776	0.043184	106	106
ABCB9	-0.128154	0.19047	0.283153	106	106
ABCC1	-0.332327	0.000500641	0.00203794	106	106
ABCC10	-0.356893	0.000173117	0.000839556	106	106
ABCC3	-0.315071	0.00100331	0.00366972	106	106
ABCC4	0.103399	0.291534	0.396736	106	106
ABCC5	-0.220443	0.0231652	0.0506345	106	106
ABCC6	-0.124132	0.204878	0.299714	106	106
ABCC6P1	-0.0194136	0.843417	0.887247	106	105
ABCC6P2	-2.21333e-05	0.99982	0.999838	106	106
ABCC9	0.611538	3.32636e-12	1.04051e-10	106	106
ABCD1	-0.229915	0.0177447	0.0407643	106	106
ABCD3	-0.0216992	0.82526	0.873599	106	106
ABCD4	-0.0663091	0.499458	0.602244	106	106
ABCE1	0.117571	0.230029	0.328766	106	106
ABCF1	-0.396467	2.58506e-05	0.000166835	106	106
ABCF2	-0.340703	0.000351963	0.00153021	106	106
ABCF3	-0.364851	0.000120421	0.000617776	106	106
ABCG1	-0.0849506	0.386591	0.495157	106	106
ABHD10	0.207646	0.0326929	0.0672587	106	106
ABHD11	-0.203545	0.0363729	0.0733771	106	106
ABHD11-AS1	0.0698846	0.47656	0.580501	106	106
ABHD12	0.0514218	0.600634	0.693063	106	106
ABHD13	0.346623	0.000272731	0.00123761	106	106
ABHD14A	0.163388	0.094229	0.160586	106	106
ABHD14B	-0.246637	0.0108133	0.0271537	106	106
ABHD15	-0.103448	0.291302	0.39662	106	106
ABHD16A	0.0704719	0.472854	0.577238	106	106
ABHD16B	-0.209118	0.0314509	0.0651338	106	106
ABHD17A	0.103647	0.29037	0.395622	106	106
ABHD17B	-0.0272211	0.78179	0.841928	106	106
ABHD17C	-0.319551	0.000840907	0.00316326	106	106
ABHD18	-0.319613	0.000838849	0.00315639	106	106
ABHD2	-0.215173	0.0267539	0.0568921	106	106
ABHD3	-0.0733673	0.454813	0.560903	106	106
ABHD4	0.117906	0.228697	0.327398	106	106
ABHD5	0.259849	0.0071461	0.0191614	106	106
ABHD6	-0.0607257	0.536333	0.63663	106	106
ABHD8	0.396662	2.55945e-05	0.000165382	106	106
ABI1	0.24607	0.011002	0.0275143	106	106
ABI2	-0.00185113	0.984975	0.990249	106	106
ABI3	0.397024	2.51238e-05	0.000162898	106	106
ABI3BP	0.206476	0.0337091	0.0689583	106	106
ABL1	-0.342299	0.000328739	0.00144414	106	106
ABL2	-0.0492991	0.615771	0.706178	106	106
ABLIM1	-0.361609	0.000139774	0.000702272	106	106
ABLIM2	-0.211427	0.0295832	0.0618507	106	106
ABLIM3	0.303711	0.00155118	0.00528508	106	106
ABO	-0.475981	2.5119e-07	3.13278e-06	106	105
ABR	-0.339499	0.000370483	0.00159173	106	106
ABRACL	0.162872	0.095286	0.162059	106	106
ABT1	0.103561	0.290773	0.39602	106	106
ABTB1	0.218966	0.0241268	0.0523122	106	106
ABTB2	-0.180693	0.063799	0.116898	106	106
ACAA1	0.195952	0.0441056	0.0859295	106	106
ACAA2	0.0590796	0.547457	0.646476	106	106
ACACA	-0.449765	1.31968e-06	1.32282e-05	106	106
ACACB	-0.0960185	0.327523	0.434613	106	106
ACAD10	-0.358664	0.000159814	0.000783885	106	106
ACAD11	0.0200588	0.838283	0.883431	106	106
ACAD8	-0.222044	0.0221603	0.0489298	106	106
ACAD9	-0.383553	4.93997e-05	0.00028826	106	106
ACADM	0.198748	0.0411123	0.0810227	106	106
ACADS	0.00119403	0.990308	0.993403	106	106
ACADSB	-0.0951287	0.332047	0.438888	106	106
ACADVL	0.0583508	0.552418	0.651069	106	106
ACAP1	0.311825	0.00113832	0.00406864	106	106
ACAP2	0.190857	0.0500249	0.0951651	106	106
ACAP3	-0.328664	0.000582239	0.00230807	106	106
ACAT1	0.135397	0.166404	0.254447	106	106
ACAT2	0.0265698	0.786886	0.845255	106	106
ACBD3	0.137285	0.160518	0.247044	106	106
ACBD4	-0.0637564	0.516151	0.617951	106	106
ACBD5	0.0127885	0.896479	0.926937	106	106
ACBD6	-0.0379976	0.698971	0.775216	106	106
ACBD7	-0.0775872	0.429218	0.53725	106	106
ACCS	-0.192614	0.0479138	0.0919274	106	106
ACD	-0.253999	0.00860618	0.022395	106	106
ACE	-0.192317	0.0482649	0.0924808	106	106
ACE2	0.126317	0.196959	0.29062	106	106
ACER2	-0.3421	0.000331565	0.00145418	106	106
ACER3	0.11537	0.238931	0.339152	106	106
ACHE	-0.127038	0.194392	0.28762	106	106
ACIN1	-0.338616	0.000384624	0.00164358	106	106
ACKR1	0.590901	2.59442e-11	6.92632e-10	106	106
ACKR3	0.529879	5.19192e-09	9.66816e-08	106	106
ACKR4	0.432112	3.74037e-06	3.26181e-05	106	106
ACLY	-0.408943	1.34724e-05	9.55975e-05	106	106
ACO1	-0.18004	0.0647808	0.11844	106	106
ACO2	-0.466107	4.769e-07	5.4121e-06	106	106
ACOT1	0.222659	0.0217841	0.0482651	106	106
ACOT11	-0.422237	6.53366e-06	5.21532e-05	106	106
ACOT13	0.0516191	0.599236	0.69216	106	106
ACOT2	0.0252481	0.797253	0.853264	106	106
ACOT4	0.182835	0.0606651	0.112224	106	106
ACOT7	-0.108329	0.269008	0.372664	106	106
ACOT8	0.0853134	0.384559	0.493257	106	106
ACOT9	0.393066	3.07394e-05	0.000192847	106	106
ACOX1	-0.292653	0.00233253	0.00745724	106	106
ACOX2	-0.119123	0.223895	0.321465	106	106
ACOX3	-0.312796	0.0010963	0.00393828	106	106
ACP1	0.161066	0.0990645	0.167283	106	106
ACP2	0.0561411	0.567589	0.664545	106	106
ACP5	0.598063	1.29312e-11	3.65489e-10	106	106
ACP6	-0.301444	0.0016887	0.00567462	106	106
ACPP	-0.209056	0.0315024	0.0651878	106	106
ACSF2	-0.0422056	0.667507	0.749195	106	106
ACSF3	-0.313949	0.00104821	0.00380301	106	106
ACSL1	0.305738	0.00143697	0.00494847	106	106
ACSL3	-0.0451972	0.645479	0.731167	106	106
ACSL4	0.414502	9.99154e-06	7.44231e-05	106	106
ACSL5	-0.0395948	0.686964	0.765236	106	106
ACSL6	-0.00398735	0.967642	0.978529	106	106
ACSM3	0.0189049	0.84747	0.890329	106	106
ACSS1	-0.232556	0.0164441	0.0382835	106	106
ACSS2	-0.234812	0.0153994	0.0362835	106	106
ACTA2	0.669213	4.45664e-15	2.10822e-13	106	106
ACTA2-AS1	0.460244	6.91305e-07	7.45614e-06	106	106
ACTB	-0.14941	0.126357	0.203652	106	106
ACTG1	-0.379926	5.89687e-05	0.000336443	106	106
ACTG2	0.289184	0.00264232	0.00831749	106	106
ACTL10	-0.10607	0.279178	0.383638	106	106
ACTL6A	0.195934	0.0441252	0.0859427	106	106
ACTN1	-0.0923117	0.346628	0.454286	106	106
ACTN4	-0.313745	0.00105657	0.00382473	106	106
ACTR10	0.359599	0.000153179	0.000759809	106	106
ACTR1A	0.20117	0.0386588	0.0769979	106	106
ACTR1B	0.170112	0.0812677	0.14257	106	106
ACTR2	0.281317	0.00348649	0.0104851	106	106
ACTR3	0.422786	6.33684e-06	5.08835e-05	106	106
ACTR3B	-0.222272	0.02202	0.0486519	106	106
ACTR3C	0.0156844	0.873215	0.908832	106	106
ACTR5	-0.0879802	0.369819	0.477943	106	106
ACTR6	0.28104	0.00352025	0.0105609	106	106
ACTR8	0.144136	0.14046	0.222271	106	106
ACTRT3	0.154194	0.11453	0.188052	106	106
ACVR1	0.250911	0.00947837	0.024308	106	106
ACVR1B	-0.376146	7.07662e-05	0.00039242	106	106
ACVR1C	0.0325737	0.740283	0.809205	106	106
ACVR2A	0.221284	0.0226327	0.0497441	106	106
ACVR2B	-0.364024	0.000125107	0.000637452	106	106
ACVRL1	0.141633	0.147555	0.231291	106	106
ACY1	-0.135652	0.165599	0.253532	106	106
ACY3	0.0169805	0.862837	0.901415	106	106
ACYP1	-0.0641207	0.513751	0.61557	106	106
ACYP2	0.138318	0.157364	0.243356	106	106
ADA	0.334218	0.000462764	0.00192087	106	106
ADA2	0.0895362	0.361381	0.469061	106	106
ADAL	0.0936158	0.339829	0.447185	106	106
ADAM10	0.260388	0.00702331	0.0188848	106	106
ADAM12	0.590137	2.7918e-11	7.42386e-10	106	106
ADAM15	-0.117516	0.230251	0.329043	106	106
ADAM17	0.203521	0.0363954	0.0734114	106	106
ADAM19	0.212918	0.0284286	0.0598305	106	106
ADAM1A	-0.33063	0.000537036	0.00215871	106	106
ADAM22	0.127332	0.193354	0.286429	106	106
ADAM28	0.358731	0.000159334	0.000782279	106	106
ADAM8	0.276651	0.0040946	0.0119686	106	106
ADAM9	0.273666	0.00453187	0.0130525	106	106
ADAMDEC1	0.193829	0.0464969	0.0896555	106	106
ADAMTS1	0.170795	0.0800353	0.140866	106	106
ADAMTS12	0.486762	1.21857e-07	1.63971e-06	106	106
ADAMTS14	0.0471474	0.631281	0.718768	106	106
ADAMTS2	0.365697	0.000115802	0.000597035	106	106
ADAMTS4	0.048543	0.621203	0.710926	106	106
ADAMTS9	-0.0224717	0.819144	0.869378	106	106
ADAP1	-0.0984277	0.315475	0.421238	106	106
ADAP2	0.463412	5.66122e-07	6.29975e-06	106	106
ADAR	-0.281201	0.00350056	0.0105204	106	106
ADARB1	0.292069	0.00238227	0.00759106	106	106
ADAT1	-0.221578	0.0224487	0.0494532	106	106
ADAT2	-0.376702	6.89018e-05	0.000383718	106	106
ADAT3	-0.347042	0.000267802	0.00121812	106	106
ADCK1	-0.453834	1.02929e-06	1.06174e-05	106	106
ADCK2	-0.0862521	0.379331	0.487954	106	106
ADCK5	-0.209651	0.0310112	0.0644211	106	106
ADCY3	-0.198817	0.0410408	0.0809172	106	106
ADCY4	0.10349	0.291107	0.396395	106	106
ADCY6	-0.340239	0.000358994	0.00155229	106	106
ADCY7	0.212802	0.0285168	0.0599661	106	106
ADCY9	-0.36184	0.000138302	0.000696263	106	106
ADD1	-0.230158	0.017621	0.0405611	106	106
ADD3	0.0688947	0.482842	0.586511	106	106
ADD3-AS1	-0.0528129	0.590804	0.684592	106	106
ADGRA2	0.488286	1.09795e-07	1.49671e-06	106	106
ADGRA3	-0.287116	0.00284427	0.00883248	106	106
ADGRE2	0.249076	0.0100325	0.0254868	106	106
ADGRE5	-0.437007	2.8183e-06	2.57079e-05	106	106
ADGRF4	-0.00954349	0.922652	0.947027	106	106
ADGRF5	0.42982	4.26398e-06	3.64534e-05	106	106
ADGRG1	-0.375795	7.19661e-05	0.000397642	106	106
ADGRG3	0.399576	2.20298e-05	0.000146093	106	106
ADGRG5	0.0218629	0.823964	0.872738	106	106
ADGRG6	0.0260795	0.790727	0.848036	106	106
ADGRG7	0.301972	0.00165573	0.00557924	106	106
ADGRL1	-0.330574	0.00053828	0.00216242	106	106
ADGRL2	0.644413	9.10654e-14	3.50784e-12	106	106
ADGRL4	0.79143	5.7423e-24	1.24867e-21	106	106
ADH1B	0.409404	1.31451e-05	9.3719e-05	106	103
ADH1C	0.0874171	0.372902	0.481322	106	106
ADH5	0.304825	0.00148744	0.00509753	106	106
ADH6	0.0173963	0.859511	0.898917	106	106
ADI1	-0.0174156	0.859358	0.898885	106	106
ADIPOR1	0.187281	0.0545607	0.10245	106	106
ADIPOR2	0.0643055	0.512536	0.61466	106	106
ADIRF	0.0665104	0.498154	0.601078	106	106
ADK	0.223965	0.0210038	0.0468287	106	106
ADM	-0.00271546	0.97796	0.98571	106	106
ADM2	-0.330963	0.000529698	0.00213558	106	106
ADNP	-0.324933	0.000677734	0.00262714	106	106
ADNP-AS1	-0.0107003	0.913311	0.939843	106	106
ADNP2	-0.134489	0.169291	0.258013	106	106
ADO	0.307155	0.00136167	0.00471446	106	106
ADORA2A	0.472738	3.10765e-07	3.75088e-06	106	106
ADORA2B	0.0545505	0.57863	0.674254	106	106
ADORA3	0.516724	1.42496e-08	2.41045e-07	106	106
ADPGK	0.393969	2.93631e-05	0.000186136	106	106
ADPRH	0.44506	1.75213e-06	1.69214e-05	106	106
ADPRHL1	-0.270559	0.00503062	0.0142515	106	106
ADPRHL2	0.191835	0.0488403	0.0933929	106	106
ADPRM	0.422572	6.4131e-06	5.14345e-05	106	106
ADRA2A	0.0327565	0.738878	0.808305	106	106
ADRM1	0.0223667	0.819975	0.869985	106	106
ADSL	0.269809	0.00515813	0.0145485	106	106
ADSS	0.191151	0.0496667	0.0946173	106	106
ADTRP	0.0208207	0.832229	0.878955	106	106
AEBP1	0.343261	0.000315436	0.00139524	106	106
AEBP2	0.100546	0.305123	0.410608	106	106
AEN	0.0825367	0.400276	0.5083	106	106
AES	-0.133112	0.173741	0.263188	106	106
AFAP1	-0.264224	0.00620172	0.0170057	106	106
AFAP1L1	0.550464	9.78227e-10	2.07692e-08	106	106
AFAP1L2	0.0430273	0.661427	0.744463	106	106
AFDN	-0.302548	0.00162038	0.00548068	106	106
AFF1	-0.332005	0.000507361	0.00206156	106	106
AFF4	-0.194764	0.0454305	0.0879893	106	106
AFG1L	0.056975	0.56184	0.65936	106	106
AFG3L1P	-0.350393	0.000231232	0.00107388	106	106
AFG3L2	-0.209052	0.031506	0.0651878	106	106
AFMID	-0.172117	0.077692	0.137695	106	106
AFTPH	0.10165	0.299813	0.405221	106	106
AGA	0.160763	0.0997113	0.168103	106	106
AGAP1	-0.530374	4.99419e-09	9.31282e-08	106	106
AGAP2-AS1	0.450415	1.26864e-06	1.27641e-05	106	106
AGAP3	-0.113736	0.245696	0.346929	106	106
AGAP4	-0.155268	0.111996	0.184814	106	106
AGAP5	-0.210424	0.0303828	0.0633206	106	106
AGAP6	-0.234845	0.0153844	0.036261	106	106
AGAP9	-0.286714	0.00288509	0.00893356	106	106
AGBL5	-0.193585	0.0467792	0.0900968	106	106
AGER	0.0124219	0.899431	0.929134	106	106
AGFG1	0.0661394	0.500559	0.603409	106	106
AGFG2	-0.310236	0.00121026	0.00427698	106	106
AGGF1	0.265713	0.00590676	0.016332	106	106
AGK	0.158502	0.104632	0.17478	106	106
AGL	0.0272787	0.78134	0.841645	106	106
AGMAT	-0.0658232	0.502613	0.605345	106	106
AGO1	-0.271009	0.00495543	0.0140858	106	106
AGO2	-0.359614	0.000153078	0.000759588	106	106
AGO3	0.00175875	0.985724	0.990574	106	106
AGO4	-0.0884313	0.367361	0.475495	106	106
AGPAT1	-0.286328	0.00292478	0.00903571	106	106
AGPAT2	0.0364759	0.710479	0.784174	106	106
AGPAT3	-0.333798	0.000470929	0.00194399	106	106
AGPAT4	0.264648	0.0061164	0.0168288	106	106
AGPAT5	0.120557	0.218326	0.315461	106	106
AGPS	0.311093	0.00117098	0.00416767	106	106
AGR2	-0.112828	0.249508	0.351245	106	106
AGR3	-0.039851	0.685045	0.76354	106	106
AGRN	-0.200383	0.0394423	0.0783038	106	106
AGT	-0.168953	0.0833938	0.145486	106	106
AGTPBP1	-0.0301471	0.759016	0.823718	106	106
AGTRAP	0.111751	0.254085	0.356311	106	106
AHCTF1	-0.173855	0.074697	0.133298	106	106
AHCY	-0.0706053	0.472014	0.576526	106	106
AHCYL1	-0.352593	0.000209801	0.000989347	106	106
AHCYL2	-0.107258	0.273798	0.377863	106	106
AHDC1	-0.207219	0.0330605	0.0679142	106	106
AHI1	-0.0720413	0.463028	0.568589	106	106
AHNAK	-0.126104	0.197721	0.29149	106	106
AHNAK2	0.128327	0.189868	0.282362	106	106
AHR	0.197091	0.0428643	0.0839112	106	106
AHSA1	0.0144756	0.882914	0.916567	106	106
AHSA2	-0.227877	0.0188077	0.0426663	106	106
AIDA	0.405597	1.60867e-05	0.000111418	106	106
AIF1	0.66186	1.12312e-14	4.96454e-13	106	106
AIF1L	0.288592	0.00269878	0.00846161	106	106
AIFM1	-0.259414	0.00724644	0.0193927	106	106
AIFM2	-0.0452803	0.644872	0.730786	106	106
AIFM3	-0.241502	0.0126325	0.0307809	106	106
AIG1	0.287597	0.00279609	0.008708	106	106
AIM1	-0.194751	0.0454453	0.0880053	106	106
AIM1L	-0.065355	0.505664	0.607879	106	106
AIM2	0.306309	0.00140618	0.00485483	106	106
AIMP1	0.114327	0.243235	0.343994	106	106
AIMP2	0.0915727	0.350519	0.458138	106	106
AIP	0.243828	0.0117776	0.0291447	106	106
AJUBA	0.221321	0.0226091	0.0497253	106	106
AK1	-0.0124781	0.898979	0.928738	106	106
AK2	0.126105	0.197715	0.29149	106	106
AK3	0.0184976	0.850718	0.892698	106	106
AK4	0.155557	0.111323	0.183952	106	106
AK6	0.261879	0.00669327	0.0181494	106	106
AK9	-0.0733734	0.454776	0.560903	106	106
AKAP1	-0.458741	7.59488e-07	8.10721e-06	106	106
AKAP10	0.349464	0.000240883	0.00111181	106	106
AKAP11	-0.0274478	0.780019	0.840826	106	106
AKAP12	0.512556	1.94479e-08	3.2132e-07	106	106
AKAP13	-0.0454664	0.643512	0.729786	106	106
AKAP17A	-0.314603	0.00102183	0.00372323	106	106
AKAP2	0.249763	0.00982189	0.0250366	106	106
AKAP5	0.176599	0.0701557	0.126584	106	106
AKAP7	-0.000160757	0.998695	0.99914	106	106
AKAP8	-0.470338	3.63239e-07	4.27769e-06	106	106
AKAP8L	-0.334046	0.000466084	0.00193227	106	106
AKAP9	-0.1706	0.0803859	0.141299	106	106
AKIP1	0.0170086	0.862612	0.90125	106	106
AKIRIN1	0.0144387	0.883211	0.916804	106	106
AKIRIN2	-0.169523	0.0823425	0.14395	106	106
AKNA	-0.196031	0.0440182	0.0858212	106	106
AKR1A1	0.2646	0.00612605	0.0168485	106	106
AKR1B1	0.575946	1.05232e-10	2.57953e-09	106	106
AKR1B10	-0.201532	0.038302	0.0764566	106	106
AKR1C1	0.47317	3.0211e-07	3.66942e-06	106	106
AKR1C2	0.420132	7.34176e-06	5.7581e-05	106	106
AKR1C3	0.306099	0.00141744	0.00488995	106	106
AKR1E2	0.167124	0.0868397	0.150092	106	105
AKR7A2	0.103726	0.290001	0.395248	106	106
AKR7A3	-0.149329	0.126564	0.20394	106	106
AKR7L	-0.25957	0.00721029	0.019322	106	106
AKT1	0.0601589	0.54015	0.640203	106	106
AKT1S1	-0.396843	2.53581e-05	0.000164049	106	106
AKT2	-0.0525421	0.592712	0.686272	106	106
AKT3	0.768788	6.47773e-22	9.49268e-20	106	106
AKTIP	0.420915	7.03078e-06	5.55621e-05	106	106
ALAD	-0.055637	0.571077	0.667586	106	106
ALAS1	-0.320181	0.000820116	0.00309609	106	106
ALCAM	0.0448253	0.648201	0.733757	106	106
ALDH16A1	-0.175658	0.0716877	0.128866	106	106
ALDH18A1	-0.0471079	0.631568	0.719003	106	106
ALDH1A1	0.312931	0.00109058	0.00392295	106	106
ALDH1A3	0.388314	3.90309e-05	0.000235759	106	106
ALDH1B1	-0.0633158	0.519061	0.620388	106	106
ALDH1L1	-0.0935938	0.339943	0.44722	106	105
ALDH1L2	0.246774	0.0107682	0.02707	106	106
ALDH2	-0.107874	0.271035	0.374933	106	106
ALDH3A1	-0.389478	3.68248e-05	0.000224648	106	105
ALDH3A2	0.0218711	0.823898	0.872738	106	106
ALDH3B1	0.0788681	0.421615	0.5297	106	106
ALDH4A1	-0.220971	0.0228295	0.0500711	106	106
ALDH5A1	-0.398591	2.31785e-05	0.000152435	106	106
ALDH6A1	-0.328915	0.000576286	0.00228778	106	106
ALDH7A1	-0.0357188	0.716229	0.789163	106	106
ALDH9A1	-0.116476	0.234428	0.333886	106	106
ALDOA	-0.307498	0.00134401	0.00466528	106	106
ALDOB	-0.0177555	0.856642	0.897098	106	106
ALDOC	-0.208224	0.0322	0.0663894	106	106
ALG1	0.0264212	0.78805	0.846101	106	106
ALG10	0.102314	0.296654	0.401838	106	106
ALG10B	-0.0547629	0.57715	0.67276	106	106
ALG11	-0.135	0.167661	0.256078	106	106
ALG12	-0.272019	0.00479046	0.0136746	106	106
ALG13	0.109191	0.265196	0.368558	106	106
ALG14	0.122355	0.211489	0.307317	106	106
ALG1L	-0.124155	0.204796	0.299626	106	106
ALG2	0.000421882	0.996575	0.99776	106	106
ALG3	-0.467432	4.38097e-07	5.02494e-06	106	106
ALG5	0.100583	0.304943	0.410497	106	106
ALG6	0.0308446	0.753617	0.819583	106	106
ALG8	0.212255	0.0289373	0.060721	106	106
ALG9	-0.345365	0.000288049	0.00129234	106	106
ALKAL1	0.0654129	0.505286	0.607624	106	103
ALKBH1	-0.32682	0.000627768	0.00246177	106	106
ALKBH2	-0.00820841	0.933446	0.954428	106	106
ALKBH3	0.0588154	0.549253	0.648085	106	106
ALKBH4	0.0136917	0.889213	0.921262	106	106
ALKBH5	0.0377036	0.701189	0.776973	106	106
ALKBH6	0.0350908	0.721011	0.793006	106	106
ALKBH7	0.0445096	0.650516	0.735441	106	106
ALKBH8	0.259538	0.00721786	0.0193376	106	106
ALMS1	-0.327482	0.000611055	0.00240463	106	106
ALOX12-AS1	0.332563	0.000495754	0.00202293	106	106
ALOX5	0.237301	0.014314	0.0341741	106	106
ALOX5AP	0.769569	5.55393e-22	8.41326e-20	106	106
ALPK1	-0.22805	0.0187155	0.0425215	106	106
ALPL	0.339784	0.000366015	0.00157555	106	106
ALS2	0.0757487	0.440267	0.547319	106	106
ALS2CL	-0.334927	0.000449249	0.00186995	106	106
ALYREF	-0.153764	0.115556	0.189483	106	106
AMACR	-0.102895	0.293901	0.399071	106	106
AMBRA1	-0.342712	0.000322975	0.00142299	106	106
AMD1	0.281729	0.00343695	0.0103593	106	106
AMDHD2	0.0722907	0.461477	0.567201	106	106
AMER1	-0.257564	0.00768814	0.0203638	106	106
AMFR	-0.246177	0.0109662	0.0274655	106	106
AMIGO1	-0.252088	0.00913723	0.0235541	106	106
AMIGO2	0.527923	6.04936e-09	1.11114e-07	106	106
AMMECR1	-0.127614	0.192361	0.285238	106	106
AMMECR1L	-0.300447	0.00175255	0.00586591	106	106
AMN	-0.173686	0.0749841	0.133739	106	106
AMN1	0.325429	0.000664258	0.00258382	106	106
AMOT	-0.143335	0.1427	0.225121	106	106
AMOTL1	0.499261	5.10363e-08	7.5035e-07	106	106
AMOTL2	-0.0199254	0.839344	0.884135	106	106
AMPD2	-0.289831	0.00258188	0.00814816	106	106
AMPD3	0.0152003	0.877098	0.911651	106	106
AMT	-0.00941766	0.923669	0.947721	106	106
AMY2B	-0.099618	0.30963	0.415325	106	106
AMZ2	0.135896	0.164835	0.252649	106	106
AMZ2P1	0.138655	0.156344	0.242112	106	106
ANAPC1	-0.456511	8.72543e-07	9.1695e-06	106	106
ANAPC10	0.250717	0.00953564	0.024441	106	106
ANAPC11	0.188969	0.0523795	0.098988	106	106
ANAPC13	0.298089	0.00191244	0.00632259	106	106
ANAPC15	0.00328979	0.973301	0.98263	106	106
ANAPC16	0.360107	0.000149684	0.000744977	106	106
ANAPC2	-0.367838	0.000104828	0.000549489	106	106
ANAPC4	0.169484	0.0824155	0.14404	106	106
ANAPC5	0.307961	0.00132051	0.0045979	106	106
ANAPC7	0.00589111	0.952208	0.967712	106	106
ANG	0.0275632	0.779118	0.840114	106	106
ANGEL1	-0.412596	1.10765e-05	8.12032e-05	106	106
ANGEL2	0.135784	0.165186	0.253044	106	106
ANGPT1	0.80462	2.76957e-25	7.77903e-23	106	106
ANGPT2	0.32802	0.000597793	0.0023614	106	106
ANGPTL1	0.687921	3.75348e-16	2.07395e-14	106	106
ANGPTL2	0.494952	6.91677e-08	9.89935e-07	106	106
ANGPTL4	0.242677	0.0121943	0.029935	106	106
ANK2	0.50842	2.6373e-08	4.2128e-07	106	106
ANK3	-0.200491	0.0393342	0.0781236	106	106
ANKDD1B	-0.0691942	0.480937	0.584775	106	106
ANKEF1	-0.18127	0.0629425	0.11558	106	106
ANKFY1	-0.242879	0.0121203	0.0297967	106	106
ANKH	0.0266441	0.786304	0.844967	106	106
ANKHD1	-0.322195	0.000756712	0.002886	106	106
ANKHD1-EIF4EBP3	-0.241982	0.0124516	0.0304283	106	106
ANKIB1	0.221129	0.0227296	0.0499089	106	106
ANKLE2	-0.114384	0.242995	0.343767	106	106
ANKMY1	-0.40348	1.79797e-05	0.000122425	106	106
ANKMY2	0.178205	0.0676043	0.122733	106	106
ANKRA2	0.0956672	0.329305	0.436394	106	106
ANKRD10	-0.111177	0.256548	0.358906	106	106
ANKRD11	-0.379218	6.10291e-05	0.000346585	106	106
ANKRD12	0.364488	0.000122459	0.000626326	106	106
ANKRD13A	0.298656	0.00187286	0.00620446	106	106
ANKRD13B	-0.380519	5.7296e-05	0.00032815	106	106
ANKRD13C	0.138118	0.157972	0.244116	106	106
ANKRD13D	0.203069	0.0368214	0.0741045	106	106
ANKRD16	-0.13096	0.180865	0.27172	106	106
ANKRD17	-0.472769	3.10128e-07	3.74969e-06	106	106
ANKRD18A	-0.397663	2.43125e-05	0.000158809	106	105
ANKRD22	0.056943	0.562061	0.659504	106	106
ANKRD26	0.125	0.201704	0.296014	106	106
ANKRD27	-0.175839	0.0713902	0.128493	106	106
ANKRD28	-0.069024	0.482019	0.585774	106	106
ANKRD29	0.533991	3.7533e-09	7.1776e-08	106	106
ANKRD36	-0.215747	0.0263413	0.0562542	106	106
ANKRD36B	-0.154691	0.113352	0.186617	106	106
ANKRD36BP1	-0.159015	0.103497	0.173228	106	106
ANKRD36BP2	0.375824	7.18635e-05	0.00039744	106	106
ANKRD36C	-0.229913	0.0177456	0.0407643	106	106
ANKRD37	0.0545122	0.578898	0.674272	106	106
ANKRD39	0.0655299	0.504523	0.607049	106	106
ANKRD40	0.068421	0.485864	0.589173	106	106
ANKRD42	-0.0991767	0.311789	0.417598	106	106
ANKRD44	0.522966	8.87285e-09	1.57607e-07	106	106
ANKRD46	0.200395	0.03943	0.0783025	106	106
ANKRD49	0.246422	0.0108845	0.027286	106	106
ANKRD50	0.277963	0.00391471	0.0115312	106	106
ANKRD52	-0.376554	6.93925e-05	0.000386272	106	106
ANKRD54	-0.200704	0.0391204	0.0777896	106	106
ANKRD65	0.6633	9.39126e-15	4.23455e-13	106	106
ANKRD9	-0.291831	0.00240278	0.00764376	106	106
ANKS1A	-0.386869	4.19398e-05	0.000250191	106	106
ANKS3	0.141261	0.148631	0.232789	106	106
ANKS4B	-0.0973857	0.320651	0.427175	106	106
ANKS6	-0.305637	0.00144249	0.00496494	106	106
ANKZF1	-0.34066	0.000352621	0.00153205	106	106
ANLN	0.0373619	0.70377	0.778937	106	106
ANO1	-0.00663942	0.946146	0.963149	106	106
ANO10	-0.0852256	0.38505	0.493746	106	106
ANO6	0.114022	0.244503	0.345497	106	106
ANO8	-0.417162	8.64386e-06	6.60264e-05	106	106
ANO9	-0.290871	0.00248735	0.00787934	106	106
ANOS1	0.586544	3.93008e-11	1.02288e-09	106	106
ANP32A	0.219397	0.0238426	0.0518211	106	106
ANP32B	-0.366814	0.000109948	0.000570783	106	106
ANP32E	0.244046	0.0117002	0.0289913	106	106
ANPEP	0.231269	0.0170673	0.0395023	106	106
ANTXR1	0.565815	2.612e-10	6.02995e-09	106	106
ANTXR2	0.294989	0.00214271	0.00694089	106	106
ANXA1	0.60962	4.05166e-12	1.23865e-10	106	106
ANXA11	-0.242376	0.0123052	0.030136	106	106
ANXA13	0.0335254	0.732977	0.802892	106	106
ANXA2	0.388408	3.88476e-05	0.000234944	106	106
ANXA2P2	0.297198	0.00197626	0.00649062	106	106
ANXA2R	0.289277	0.00263357	0.00829575	106	106
ANXA3	0.238515	0.0138093	0.0331865	106	106
ANXA4	0.194214	0.0460552	0.0889055	106	106
ANXA5	0.624	8.938e-13	3.01255e-11	106	106
ANXA6	0.748436	2.92802e-20	3.2094e-18	106	106
ANXA7	0.235642	0.0150298	0.0356495	106	106
ANXA9	0.0408437	0.67763	0.757781	106	106
AOAH	0.212719	0.0285803	0.0600747	106	106
AOC1	-0.232247	0.0165919	0.0385809	106	106
AOC3	0.357382	0.000169342	0.000823917	106	106
AOX1	0.710671	1.42504e-17	1.00075e-15	106	106
AP1AR	-0.00425838	0.965444	0.976893	106	106
AP1B1	-0.322483	0.00074804	0.00285742	106	106
AP1G1	-0.354464	0.000193033	0.000920904	106	106
AP1G2	-0.371121	8.98654e-05	0.000481736	106	106
AP1M1	-0.0111276	0.909864	0.937111	106	106
AP1M2	-0.632536	3.51054e-13	1.27229e-11	106	106
AP1S1	-0.0426078	0.664528	0.746819	106	106
AP1S2	0.725942	1.32136e-18	1.11341e-16	106	106
AP1S3	-0.00600521	0.951284	0.966932	106	106
AP2A1	-0.384037	4.82375e-05	0.000282756	106	106
AP2A2	-0.329109	0.000571705	0.00227367	106	106
AP2B1	-0.417958	8.27519e-06	6.37885e-05	106	106
AP2M1	0.344117	0.000304009	0.00135314	106	106
AP2S1	0.111882	0.253525	0.355694	106	106
AP3B1	-0.0324762	0.741033	0.809677	106	106
AP3D1	-0.48221	1.65895e-07	2.15888e-06	106	106
AP3M1	0.0858099	0.381788	0.490309	106	106
AP3M2	0.0431377	0.660612	0.743809	106	106
AP3S1	0.347983	0.000257034	0.00117628	106	106
AP3S2	0.0748674	0.445619	0.55214	106	106
AP4B1	-0.385736	4.43601e-05	0.000263	106	106
AP4E1	0.240524	0.0130077	0.0315585	106	106
AP4M1	-0.0478361	0.626299	0.714786	106	106
AP4S1	0.370347	9.32023e-05	0.000496465	106	106
AP5B1	-0.23282	0.0163188	0.038018	106	106
AP5M1	0.163508	0.0939842	0.160229	106	106
AP5S1	-0.219365	0.0238641	0.0518593	106	106
AP5Z1	-0.226242	0.0197001	0.0443178	106	106
APAF1	-0.332763	0.000491654	0.00200863	106	106
APBA2	0.48156	1.73293e-07	2.24217e-06	106	106
APBA3	0.0764852	0.435821	0.543237	106	106
APBB1	0.55399	7.26562e-10	1.572e-08	106	106
APBB1IP	0.229704	0.0178521	0.0409671	106	106
APBB2	0.0693587	0.479892	0.583821	106	106
APBB3	-0.120504	0.218531	0.315612	106	106
APC	0.0184444	0.851143	0.892935	106	106
APCDD1	0.043807	0.655679	0.739737	106	106
APEH	-0.0827766	0.398904	0.506882	106	106
APEX1	0.106913	0.275355	0.37939	106	106
APEX2	-0.333593	0.000474966	0.00195586	106	106
APH1A	0.041036	0.676197	0.756304	106	106
APH1B	0.25237	0.00905721	0.0233881	106	106
API5	-0.122479	0.21102	0.306735	106	106
APIP	0.0646208	0.510466	0.612869	106	106
APLF	0.086121	0.380058	0.4886	106	106
APLN	0.266635	0.00573024	0.0159125	106	106
APLNR	0.474256	2.81376e-07	3.45493e-06	106	106
APLP2	-0.125339	0.200474	0.294711	106	106
APMAP	0.0791053	0.420216	0.528376	106	106
APOBEC1	0.14141	0.148201	0.232196	106	106
APOBEC3A	0.442709	2.01541e-06	1.92434e-05	106	103
APOBEC3B	0.0106245	0.913923	0.940357	106	106
APOBEC3C	0.268774	0.0053388	0.0149673	106	106
APOBEC3D	0.264666	0.00611283	0.0168225	106	106
APOBEC3F	0.0922626	0.346886	0.454491	106	106
APOBEC3G	0.473065	3.04186e-07	3.6913e-06	106	106
APOBR	-0.308155	0.00131077	0.00457225	106	106
APOC1	0.593626	1.9946e-11	5.47681e-10	106	106
APOC2	0.448945	1.38697e-06	1.38205e-05	106	106
APOD	0.344002	0.000305526	0.00135899	106	106
APOE	0.579825	7.36869e-11	1.85691e-09	106	106
APOL1	0.10097	0.303074	0.408441	106	106
APOL2	0.12983	0.18469	0.276298	106	106
APOL3	0.35268	0.00020899	0.000986556	106	106
APOL4	0.294588	0.00217432	0.00702305	106	106
APOL6	0.0923352	0.346505	0.454171	106	106
APOLD1	0.147555	0.131188	0.209932	106	106
APOM	0.201942	0.0379027	0.0758278	106	106
APOO	0.0569895	0.561741	0.659301	106	106
APOOL	-0.0875149	0.372366	0.480727	106	106
APOPT1	0.217398	0.0251848	0.0542053	106	106
APP	-0.182926	0.0605351	0.112014	106	106
APPBP2	0.264744	0.00609731	0.0167866	106	106
APPL1	-0.0977956	0.318608	0.424874	106	106
APPL2	-0.197057	0.0429015	0.0839719	106	106
APRT	-0.0471043	0.631594	0.719003	106	106
APTR	-0.00229349	0.981385	0.987741	106	106
APTX	0.0997171	0.309146	0.414841	106	106
AQP1	0.599789	1.09057e-11	3.12167e-10	106	106
AQP11	0.175332	0.0722244	0.129571	106	106
AQP3	-0.0758997	0.439353	0.546435	106	106
AQP7	0.220544	0.0231004	0.0505419	106	106
AQP8	-0.0966988	0.324092	0.430653	106	96
AQP9	0.600156	1.05161e-11	3.023e-10	106	106
AQR	0.108866	0.26663	0.369885	106	106
ARAF	-0.344559	0.000298267	0.00133094	106	106
ARAP1	0.106918	0.275331	0.37939	106	106
ARAP2	0.101875	0.298739	0.404255	106	106
ARAP3	-0.0586404	0.550443	0.64915	106	106
ARCN1	-0.330203	0.000546563	0.00219047	106	106
AREG	-0.0473501	0.629813	0.717703	106	106
AREL1	-0.330915	0.000530769	0.00213862	106	106
ARF1	-0.279109	0.00376335	0.0111641	106	106
ARF3	0.197995	0.0419014	0.082349	106	106
ARF4	0.428453	4.60851e-06	3.89297e-05	106	106
ARF4-AS1	0.11964	0.221874	0.319141	106	106
ARF5	0.134462	0.169377	0.258111	106	106
ARF6	-0.0451542	0.645794	0.731462	106	106
ARFGAP1	-0.0920737	0.347878	0.455437	106	106
ARFGAP2	-0.288854	0.00267373	0.00839283	106	106
ARFGAP3	0.252102	0.00913314	0.023549	106	106
ARFGEF1	-0.328556	0.000584811	0.0023169	106	106
ARFGEF2	-0.332666	0.00049365	0.00201495	106	106
ARFGEF3	-0.460827	6.66449e-07	7.23435e-06	106	106
ARFIP1	0.123252	0.208133	0.30352	106	106
ARFIP2	-0.00409432	0.966775	0.978092	106	106
ARFRP1	-0.0143489	0.883932	0.917341	106	106
ARG2	0.213498	0.0279891	0.059053	106	106
ARGLU1	-0.0479726	0.625314	0.714207	106	106
ARHGAP1	-0.258269	0.00751713	0.0199854	106	106
ARHGAP10	0.35902	0.000157258	0.000774343	106	106
ARHGAP11A	-0.0338624	0.730395	0.800534	106	106
ARHGAP11B	-0.307215	0.00135859	0.0047074	106	106
ARHGAP12	0.0793858	0.418565	0.526604	106	106
ARHGAP15	0.649315	5.12806e-14	2.03342e-12	106	106
ARHGAP17	-0.355806	0.000181779	0.000875894	106	106
ARHGAP18	0.241169	0.0127591	0.0310557	106	106
ARHGAP19	0.0966236	0.32447	0.431029	106	106
ARHGAP21	-0.259525	0.00722079	0.0193376	106	106
ARHGAP22	0.409084	1.33712e-05	9.51945e-05	106	106
ARHGAP23	0.0239172	0.807728	0.861193	106	106
ARHGAP24	0.740959	1.08496e-19	1.0916e-17	106	106
ARHGAP25	0.493075	7.88541e-08	1.11789e-06	106	106
ARHGAP26	-0.317102	0.000926435	0.00343137	106	106
ARHGAP27	-0.286707	0.00288584	0.00893384	106	106
ARHGAP27P1	-0.192178	0.0484307	0.0926949	106	106
ARHGAP27P1-BPTFP1-KPNA2P3	-0.367348	0.000107253	0.00055959	106	106
ARHGAP29	0.497736	5.68598e-08	8.21633e-07	106	106
ARHGAP30	0.549121	1.09454e-09	2.30573e-08	106	106
ARHGAP31	0.464642	5.23612e-07	5.8926e-06	106	106
ARHGAP32	-0.518812	1.21747e-08	2.08829e-07	106	106
ARHGAP35	-0.425094	5.57002e-06	4.57061e-05	106	106
ARHGAP39	-0.467607	4.33205e-07	4.97909e-06	106	106
ARHGAP4	-0.0907328	0.354974	0.46266	106	106
ARHGAP42	0.166715	0.0876254	0.151166	106	106
ARHGAP44	-0.22525	0.0202591	0.0454087	106	106
ARHGAP45	-0.00210108	0.982946	0.988961	106	106
ARHGAP5	0.135581	0.165824	0.253762	106	106
ARHGAP5-AS1	-0.145974	0.135414	0.21562	106	106
ARHGAP6	0.123785	0.206158	0.30126	106	106
ARHGAP8	-0.463955	5.46961e-07	6.10442e-06	106	106
ARHGAP9	0.331798	0.000511732	0.00207744	106	106
ARHGDIA	-0.436328	2.9319e-06	2.65466e-05	106	106
ARHGDIB	0.355563	0.00018377	0.000882758	106	106
ARHGEF1	-0.289398	0.00262221	0.00826576	106	106
ARHGEF10	0.0405429	0.679874	0.759593	106	106
ARHGEF10L	-0.270939	0.00496719	0.0141112	106	106
ARHGEF11	-0.428853	4.50514e-06	3.81043e-05	106	106
ARHGEF12	-0.287852	0.00277088	0.00864147	106	106
ARHGEF16	-0.471695	3.32614e-07	3.97545e-06	106	106
ARHGEF17	0.15908	0.103356	0.173056	106	106
ARHGEF18	-0.370884	9.0876e-05	0.000486187	106	106
ARHGEF19	-0.0279554	0.776057	0.837493	106	106
ARHGEF2	-0.313912	0.00104973	0.00380543	106	106
ARHGEF25	0.690087	2.7851e-16	1.59105e-14	106	106
ARHGEF28	-0.215386	0.0266001	0.0566957	106	106
ARHGEF3	0.190267	0.0507508	0.0963151	106	106
ARHGEF34P	-0.369009	9.92449e-05	0.000524097	106	106
ARHGEF35	-0.0638139	0.515771	0.617551	106	106
ARHGEF37	0.0644936	0.511301	0.61367	106	106
ARHGEF38	-0.409007	1.34263e-05	9.54176e-05	106	106
ARHGEF39	-0.0928533	0.343794	0.451361	106	106
ARHGEF40	0.0230349	0.814691	0.866357	106	106
ARHGEF5	-0.422342	6.49548e-06	5.19099e-05	106	106
ARHGEF6	0.53243	4.24753e-09	8.03158e-08	106	106
ARHGEF7	-0.339951	0.000363428	0.00156807	106	106
ARHGEF9	0.0495429	0.614024	0.704714	106	106
ARID1A	-0.382982	5.08045e-05	0.000295363	106	106
ARID1B	-0.368943	9.955e-05	0.000525297	106	106
ARID2	-0.186983	0.0549527	0.103078	106	106
ARID3A	-0.118917	0.224702	0.322451	106	106
ARID3B	-0.235433	0.0151221	0.0358172	106	106
ARID4A	0.169609	0.0821855	0.143733	106	106
ARID4B	0.0767957	0.433955	0.54157	106	106
ARID5A	0.287111	0.00284479	0.00883248	106	106
ARID5B	0.140625	0.150488	0.235015	106	106
ARIH1	0.0979209	0.317985	0.424169	106	106
ARIH2	-0.0945685	0.334915	0.442022	106	106
ARL1	0.34069	0.000352162	0.00153058	106	106
ARL11	0.416796	8.81849e-06	6.71114e-05	106	106
ARL13B	0.290242	0.00254418	0.00804046	106	106
ARL14	-0.0338212	0.73071	0.8008	106	106
ARL14EP	0.402856	1.85756e-05	0.00012591	106	106
ARL15	0.360662	0.00014595	0.000728235	106	106
ARL16	0.074436	0.448253	0.55474	106	106
ARL17A	-0.224888	0.0204665	0.0457593	106	106
ARL17B	-0.061768	0.529348	0.630392	106	106
ARL2	0.246129	0.0109825	0.0274894	106	106
ARL2BP	0.294	0.00222133	0.00714919	106	106
ARL3	0.408015	1.41539e-05	9.9855e-05	106	106
ARL4A	0.153788	0.115499	0.189422	106	106
ARL4C	0.602876	8.02048e-12	2.3507e-10	106	106
ARL4D	0.366971	0.000109151	0.000567301	106	106
ARL5A	0.36488	0.000120263	0.000617201	106	106
ARL5B	0.143506	0.14222	0.224496	106	106
ARL6	0.378438	6.33748e-05	0.000357049	106	106
ARL6IP1	0.192278	0.0483115	0.0925193	106	106
ARL6IP4	0.311189	0.00116662	0.00415435	106	106
ARL6IP5	0.58814	3.37797e-11	8.9123e-10	106	106
ARL6IP6	0.183854	0.0592193	0.10982	106	106
ARL8A	-0.114801	0.241274	0.341866	106	106
ARL8B	0.522069	9.50358e-09	1.66832e-07	106	106
ARMC1	0.237377	0.0142817	0.0341212	106	106
ARMC10	0.187755	0.0539412	0.101541	106	106
ARMC2	0.151617	0.120789	0.196415	106	106
ARMC5	-0.289119	0.00264851	0.00833111	106	106
ARMC6	-0.14541	0.136947	0.217599	106	106
ARMC7	-0.405268	1.63676e-05	0.000112989	106	106
ARMC8	0.383033	5.06769e-05	0.000294748	106	106
ARMC9	0.279233	0.00374732	0.0111256	106	106
ARMCX1	0.828562	5.9637e-28	3.2161e-25	106	106
ARMCX2	0.592552	2.21305e-11	6.0154e-10	106	106
ARMCX3	0.286628	0.00289391	0.00895472	106	106
ARMCX4	0.0632238	0.519669	0.62073	106	106
ARMCX5	0.16706	0.0869617	0.150233	106	106
ARMCX5-GPRASP2	0.338084	0.00039338	0.00167199	106	105
ARMCX6	0.296485	0.00202862	0.00664155	106	106
ARMT1	0.301253	0.00170077	0.00570817	106	106
ARNT	-0.116149	0.235756	0.335387	106	106
ARNTL	0.215378	0.0266059	0.0566957	106	106
ARNTL2	0.36822	0.000102976	0.000541257	106	106
ARPC1A	-0.201329	0.0385013	0.0767588	106	106
ARPC1B	0.239491	0.0134144	0.0323762	106	106
ARPC2	0.536929	2.96852e-09	5.81709e-08	106	106
ARPC3	0.361935	0.000137707	0.000693784	106	106
ARPC4	0.132268	0.176509	0.266423	106	106
ARPC4-TTLL3	-0.230956	0.0172218	0.0398052	106	105
ARPC5	0.262173	0.00662981	0.0180063	106	106
ARPC5L	0.0209003	0.831597	0.878445	106	106
ARPIN	0.179585	0.065471	0.119507	106	106
ARPP19	0.32295	0.000734154	0.00281189	106	106
ARRB1	0.0917669	0.349494	0.457109	106	106
ARRB2	0.302738	0.00160894	0.00545154	106	106
ARRDC1	-0.172778	0.0765416	0.135996	106	106
ARRDC1-AS1	-0.015623	0.873707	0.909109	106	106
ARRDC2	0.0298808	0.761081	0.825162	106	106
ARRDC3	0.445453	1.71133e-06	1.65749e-05	106	106
ARRDC4	0.39344	3.01618e-05	0.000189753	106	106
ARSA	-0.217065	0.0254146	0.0546125	106	106
ARSB	0.244078	0.011689	0.0289744	106	106
ARSD	-0.261196	0.00684251	0.0184797	106	106
ARSD-AS1	-0.415546	9.44094e-06	7.09887e-05	106	97
ARSE	0.0181537	0.853462	0.89502	106	106
ARSG	0.259916	0.00713077	0.0191318	106	106
ARSJ	0.176324	0.0706015	0.127321	106	106
ARSK	0.245898	0.01106	0.0276184	106	106
ARV1	0.0656764	0.503569	0.606117	106	106
ARVCF	-0.195074	0.0450813	0.0874527	106	106
ASAH1	0.430776	4.03782e-06	3.47402e-05	106	106
ASAH2B	-0.115922	0.236678	0.336296	106	106
ASAP1	-0.101048	0.302701	0.40802	106	106
ASAP2	-0.299538	0.00181268	0.00603868	106	106
ASAP3	0.39604	2.64218e-05	0.000169871	106	106
ASB1	-0.12603	0.197986	0.291814	106	106
ASB13	0.012768	0.896645	0.927037	106	106
ASB16-AS1	-0.34608	0.000279242	0.00126249	106	106
ASB2	0.299113	0.00184146	0.00611792	106	106
ASB3	0.36613	0.000113497	0.000586721	106	106
ASB6	-0.329795	0.000555825	0.00221968	106	106
ASB7	0.161606	0.0979239	0.16571	106	106
ASB8	0.192305	0.0482797	0.0924845	106	106
ASB9	-0.0181324	0.853632	0.895059	106	106
ASCC1	0.323618	0.000714664	0.00274974	106	106
ASCC2	-0.409823	1.28545e-05	9.21344e-05	106	106
ASCC3	0.0836011	0.394207	0.502619	106	106
ASCL2	-0.05742	0.558784	0.656746	106	106
ASF1A	0.220473	0.0231457	0.0506	106	106
ASF1B	-0.379046	6.15375e-05	0.000348707	106	106
ASH1L	-0.389928	3.60038e-05	0.000220237	106	106
ASH1L-AS1	-0.280396	0.00359964	0.0107535	106	106
ASH2L	0.20405	0.0359016	0.0726001	106	106
ASIC1	-0.132717	0.175033	0.264623	106	106
ASL	-0.205695	0.0344024	0.0700625	106	106
ASMTL	0.0900597	0.358569	0.466399	106	106
ASMTL-AS1	-0.195161	0.0449837	0.0873121	106	106
ASNA1	0.124998	0.201712	0.296014	106	106
ASNS	-0.0688347	0.483225	0.586816	106	106
ASNSD1	0.295011	0.00214102	0.0069374	106	106
ASPH	-0.0558192	0.569815	0.666389	106	106
ASPHD1	0.0386888	0.693765	0.770774	106	106
ASPHD2	-0.0881178	0.369068	0.477247	106	106
ASPM	-0.0351976	0.720197	0.792693	106	106
ASPN	0.884996	2.61581e-36	5.87772e-33	106	106
ASPSCR1	-0.0737264	0.452603	0.559098	106	106
ASRGL1	-0.110436	0.259753	0.362562	106	106
ASS1	-0.0475876	0.628095	0.716411	106	106
ASTE1	0.250052	0.00973444	0.0248701	106	106
ASTN2	-0.15511	0.112366	0.185311	106	106
ASXL1	-0.22811	0.0186834	0.0424772	106	106
ASXL2	-0.402496	1.89288e-05	0.000127928	106	106
ATAD1	0.301102	0.00171037	0.00573469	106	106
ATAD2	-0.0222855	0.820617	0.870461	106	106
ATAD2B	-0.187356	0.0544621	0.102336	106	106
ATAD3A	-0.302435	0.00162725	0.00549978	106	106
ATAD3B	-0.089625	0.360903	0.468544	106	106
ATAD5	-0.198728	0.0411333	0.0810522	106	106
ATAT1	-0.367813	0.00010495	0.000549704	106	106
ATE1	0.177427	0.0688305	0.124594	106	106
ATF1	0.316539	0.000947195	0.00349482	106	106
ATF2	0.378734	6.24737e-05	0.000352439	106	106
ATF3	-0.0605455	0.537545	0.637732	106	106
ATF4	0.15039	0.12386	0.200562	106	106
ATF5	-0.0286557	0.7706	0.833204	106	106
ATF6	0.194018	0.04628	0.0893012	106	106
ATF6B	-0.381513	5.45869e-05	0.000314504	106	106
ATF7	-0.23866	0.01375	0.0330847	106	106
ATF7IP	-0.207573	0.0327559	0.0673604	106	106
ATF7IP2	-0.129679	0.185205	0.276883	106	106
ATG10	0.163988	0.0930088	0.158767	106	106
ATG101	0.334579	0.000455833	0.00189443	106	106
ATG12	0.298935	0.00185362	0.00615161	106	106
ATG13	-0.0536277	0.585081	0.679479	106	106
ATG14	0.223916	0.0210323	0.0468769	106	106
ATG16L1	-0.167294	0.086515	0.149691	106	106
ATG16L2	-0.0575815	0.557677	0.655673	106	106
ATG2A	-0.375814	7.19e-05	0.00039744	106	106
ATG2B	-0.309457	0.00124706	0.00438748	106	106
ATG3	0.162831	0.0953707	0.162177	106	106
ATG4A	0.20934	0.0312672	0.0648031	106	106
ATG4B	-0.326548	0.000634757	0.00248401	106	106
ATG4C	0.42169	6.73502e-06	5.35702e-05	106	106
ATG4D	-0.446134	1.64299e-06	1.60281e-05	106	106
ATG5	0.269052	0.00528983	0.0148606	106	106
ATG7	0.316092	0.000963973	0.00354861	106	106
ATG9A	-0.434644	3.23272e-06	2.88442e-05	106	106
ATIC	-0.253273	0.00880486	0.0228151	106	106
ATL1	0.568642	2.03313e-10	4.7837e-09	106	106
ATL2	0.114947	0.24067	0.341082	106	106
ATL3	0.1629	0.09523	0.162005	106	106
ATM	0.312847	0.00109413	0.00393152	106	106
ATMIN	0.0372257	0.7048	0.779857	106	106
ATN1	-0.326532	0.000635166	0.00248428	106	106
ATOH1	-0.129084	0.187247	0.279316	106	101
ATOX1	0.500769	4.58396e-08	6.85914e-07	106	106
ATP10A	0.507391	2.84307e-08	4.52542e-07	106	106
ATP10B	-0.243179	0.0120111	0.0295877	106	106
ATP10D	0.148409	0.128947	0.207157	106	106
ATP11A	-0.274581	0.00439352	0.0127138	106	106
ATP11B	-0.00239336	0.980574	0.98709	106	106
ATP11C	0.164467	0.0920446	0.15736	106	106
ATP13A1	-0.472226	3.21304e-07	3.85393e-06	106	106
ATP13A2	-0.545795	1.44266e-09	2.97855e-08	106	106
ATP13A3	0.00401021	0.967457	0.978529	106	106
ATP1A1	-0.217817	0.024898	0.0536586	106	106
ATP1A1-AS1	0.0375247	0.70254	0.777894	106	106
ATP1B1	-0.202539	0.0373269	0.074954	106	106
ATP1B3	0.0441969	0.652811	0.737304	106	106
ATP23	0.0925157	0.345559	0.453325	106	106
ATP2A2	-0.387352	4.09454e-05	0.000245345	106	106
ATP2A3	-0.276647	0.00409519	0.0119686	106	106
ATP2B1	-0.0192322	0.844862	0.888489	106	106
ATP2B4	0.150713	0.123046	0.199436	106	106
ATP2C1	0.0908258	0.354479	0.462284	106	106
ATP2C2	-0.496179	6.34607e-08	9.13102e-07	106	106
ATP5A1	0.135223	0.166954	0.255172	106	106
ATP5B	0.00723897	0.941291	0.960164	106	106
ATP5C1	0.22139	0.0225663	0.0496636	106	106
ATP5D	-0.230291	0.0175539	0.0404412	106	106
ATP5E	0.209523	0.0311168	0.0645609	106	106
ATP5F1	0.100219	0.306705	0.412387	106	106
ATP5G1	0.0256191	0.794339	0.851294	106	106
ATP5G2	0.216354	0.0259107	0.0554666	106	106
ATP5G3	0.0989537	0.312883	0.418814	106	106
ATP5H	0.183422	0.0598281	0.110888	106	106
ATP5I	0.0796575	0.416969	0.524793	106	106
ATP5J	0.234468	0.0155547	0.0365665	106	106
ATP5J2	0.0380505	0.698572	0.774837	106	106
ATP5J2-PTCD1	-0.0500823	0.610167	0.701254	106	91
ATP5L	0.193361	0.0470389	0.0904935	106	106
ATP5O	0.149728	0.125543	0.202631	106	106
ATP5S	0.126136	0.197607	0.291385	106	106
ATP5SL	0.117316	0.231048	0.329942	106	106
ATP6AP1	-0.321355	0.00078261	0.00296547	106	106
ATP6AP2	0.338036	0.000394177	0.00167291	106	106
ATP6V0A1	-0.393577	2.99531e-05	0.000188881	106	106
ATP6V0A2	-0.201609	0.0382272	0.0763637	106	106
ATP6V0B	0.166556	0.0879328	0.151619	106	106
ATP6V0C	-0.302837	0.00160294	0.00543806	106	106
ATP6V0D1	-0.271949	0.00480166	0.0137036	106	106
ATP6V0E1	0.505884	3.1725e-08	4.99669e-07	106	106
ATP6V0E2	-0.213754	0.0277978	0.0586954	106	106
ATP6V1A	-0.0772095	0.431475	0.539324	106	106
ATP6V1B2	0.402294	1.9129e-05	0.000128949	106	106
ATP6V1C1	0.141023	0.149325	0.23363	106	106
ATP6V1C2	-0.00681989	0.944685	0.961951	106	106
ATP6V1D	0.347154	0.000266495	0.00121315	106	106
ATP6V1E1	0.45597	9.02278e-07	9.45184e-06	106	106
ATP6V1E2	-0.242071	0.0124185	0.0303693	106	106
ATP6V1F	0.351815	0.000217157	0.00101823	106	106
ATP6V1G1	0.29303	0.00230085	0.00736995	106	106
ATP6V1H	-0.228526	0.0184635	0.0420765	106	106
ATP7A	-0.226867	0.0193549	0.0437162	106	106
ATP7B	-0.421026	6.98755e-06	5.53178e-05	106	106
ATP8A1	-0.011036	0.910602	0.9378	106	106
ATP8B1	-0.238558	0.0137913	0.0331552	106	106
ATP8B2	0.581414	6.35896e-11	1.62063e-09	106	106
ATP8B4	0.587662	3.53518e-11	9.29071e-10	106	106
ATP9A	-0.199725	0.0401074	0.0794369	106	106
ATP9B	0.0785181	0.423685	0.531904	106	106
ATPAF1	0.0170642	0.862167	0.900995	106	106
ATPAF2	-0.0294559	0.764378	0.828204	106	106
ATPIF1	0.069685	0.477823	0.581777	106	106
ATR	-0.107875	0.27103	0.374933	106	106
ATRAID	0.262365	0.00658853	0.0179122	106	106
ATRIP	-0.372314	8.49372e-05	0.000458416	106	106
ATRN	-0.0992431	0.311463	0.417203	106	106
ATRX	0.0714293	0.466846	0.571975	106	106
ATXN1	0.179326	0.0658678	0.120097	106	106
ATXN10	0.168285	0.0846401	0.147241	106	106
ATXN1L	-0.229021	0.0182041	0.0416333	106	106
ATXN2	-0.400127	2.14095e-05	0.000142399	106	106
ATXN2L	-0.396509	2.57955e-05	0.000166559	106	106
ATXN3	0.261437	0.00678964	0.018359	106	106
ATXN7	-0.332449	0.000498108	0.00202946	106	106
ATXN7L1	-0.387583	4.04778e-05	0.000243083	106	106
ATXN7L2	-0.356681	0.000174778	0.000846391	106	106
ATXN7L3	-0.126589	0.195986	0.289438	106	106
ATXN7L3B	-0.254484	0.00847604	0.0221076	106	106
AUH	0.025186	0.797741	0.853515	106	106
AUNIP	0.0019648	0.984052	0.989557	106	106
AUP1	0.0358786	0.715014	0.788146	106	106
AURKA	-0.11761	0.229875	0.328581	106	106
AURKAIP1	0.0483951	0.622268	0.711691	106	106
AURKB	-0.224953	0.0204292	0.0457064	106	106
AUTS2	-0.299591	0.00180914	0.00602986	106	106
AVEN	0.373744	7.93672e-05	0.00043321	106	106
AVIL	0.0162421	0.868746	0.905934	106	106
AVL9	-0.249489	0.00990536	0.0252242	106	106
AVPI1	0.0180579	0.854227	0.895221	106	106
AXIN1	-0.284277	0.00314405	0.0096111	106	106
AXIN2	-0.224667	0.0205939	0.0460136	106	106
AXL	0.413968	1.0285e-05	7.63139e-05	106	106
AZGP1	-0.0676553	0.49077	0.593866	106	106
AZI2	0.595927	1.59457e-11	4.44172e-10	106	106
AZIN1	-0.0749986	0.44482	0.551404	106	106
AZIN2	0.308106	0.0013132	0.00457837	106	106
B2M	0.426429	5.16717e-06	4.29425e-05	106	106
B3GALNT1	0.518865	1.21258e-08	2.08255e-07	106	106
B3GALNT2	-0.209111	0.0314565	0.0651353	106	106
B3GALT4	0.255397	0.00823542	0.0215508	106	106
B3GALT5	-0.0501593	0.609617	0.70085	106	106
B3GALT6	-0.0566432	0.564125	0.661397	106	106
B3GAT3	-0.0387978	0.692946	0.770371	106	106
B3GLCT	0.315876	0.000972181	0.00357235	106	106
B3GNT2	0.347151	0.00026653	0.00121315	106	106
B3GNT3	-0.50166	4.30126e-08	6.48654e-07	106	106
B3GNT5	0.0625585	0.524081	0.624893	106	106
B3GNT6	-0.125426	0.200159	0.294312	106	94
B3GNT7	-0.136157	0.164016	0.251623	106	106
B3GNT8	0.00440546	0.964251	0.975979	106	106
B3GNT9	0.369429	9.73091e-05	0.000515287	106	106
B3GNTL1	-0.299458	0.00181808	0.0060522	106	106
B4GALNT3	-0.281521	0.00346189	0.0104204	106	106
B4GALT1	-0.096122	0.327	0.434004	106	106
B4GALT1-AS1	0.161801	0.0975129	0.165242	106	106
B4GALT2	0.157335	0.107245	0.178283	106	106
B4GALT3	-0.288633	0.00269489	0.00845336	106	106
B4GALT4	0.0753081	0.442938	0.549843	106	106
B4GALT5	-0.178387	0.0673202	0.122303	106	106
B4GALT6	0.00844729	0.931514	0.953364	106	106
B4GALT7	0.063503	0.517823	0.619458	106	106
B4GAT1	-0.000672884	0.994538	0.99639	106	106
B9D1	0.151914	0.120056	0.195435	106	106
B9D2	0.212082	0.0290716	0.0609743	106	106
BABAM1	0.0140821	0.886075	0.918716	106	106
BACE1	0.102679	0.294923	0.400056	106	106
BACE1-AS	-0.312621	0.00110376	0.00396296	106	103
BACE2	-0.0886953	0.365926	0.474048	106	106
BACH1	0.284227	0.00314954	0.00962204	106	106
BAD	0.23454	0.0155219	0.0365149	106	106
BAG1	-0.126371	0.196764	0.290397	106	106
BAG2	0.458205	7.85308e-07	8.3666e-06	106	106
BAG3	-0.198801	0.0410573	0.080929	106	106
BAG4	0.241994	0.0124473	0.0304232	106	106
BAG5	-0.304155	0.00152547	0.00521594	106	106
BAG6	-0.412735	1.0994e-05	8.07747e-05	106	106
BAHD1	-0.248071	0.0103482	0.0261754	106	106
BAIAP2	-0.31533	0.000993206	0.00364068	106	106
BAIAP2-AS1	-0.175288	0.0722967	0.129632	106	106
BAIAP2L1	-0.484206	1.44983e-07	1.91545e-06	106	106
BAIAP2L2	-0.388789	3.81164e-05	0.000231168	106	106
BAK1	0.0267328	0.785609	0.844893	106	106
BAMBI	0.116454	0.234519	0.33398	106	106
BANF1	-0.0675142	0.491677	0.59467	106	106
BANK1	0.46793	4.24318e-07	4.89494e-06	106	106
BANP	-0.209251	0.031341	0.0649361	106	106
BAP1	0.0214722	0.82706	0.874838	106	106
BARD1	-0.0453041	0.644697	0.73065	106	106
BARX2	-0.139279	0.154473	0.240042	106	106
BASP1	0.696243	1.17515e-16	7.20156e-15	106	106
BATF	0.432546	3.64829e-06	3.19392e-05	106	106
BATF2	-0.0602838	0.539309	0.639486	106	106
BATF3	0.462041	6.17388e-07	6.78372e-06	106	106
BAX	0.0232691	0.812842	0.865209	106	106
BAZ1A	-0.0444813	0.650723	0.735555	106	106
BAZ1B	-0.219798	0.0235809	0.0513683	106	106
BAZ2A	-0.355262	0.000186266	0.000893359	106	106
BAZ2B	-0.12299	0.209109	0.304417	106	106
BBC3	-0.203158	0.0367373	0.0739794	106	106
BBIP1	0.492482	8.21784e-08	1.15771e-06	106	106
BBOF1	0.616463	1.99268e-12	6.42711e-11	106	106
BBOX1-AS1	-0.181644	0.0623914	0.114759	106	96
BBS1	-0.334629	0.00045488	0.00189105	106	106
BBS10	0.438896	2.5237e-06	2.33525e-05	106	106
BBS12	0.24663	0.0108156	0.0271537	106	106
BBS2	-0.107755	0.271571	0.375366	106	106
BBS4	0.402171	1.92519e-05	0.000129712	106	106
BBS5	-0.110255	0.260537	0.363394	106	106
BBS7	0.17128	0.07917	0.139617	106	106
BBS9	0.210382	0.0304171	0.0633823	106	106
BBX	0.0802546	0.413474	0.521319	106	106
BCAM	-0.0663705	0.49906	0.601818	106	106
BCAP29	0.442197	2.07762e-06	1.97954e-05	106	106
BCAP31	0.0149318	0.879252	0.913679	106	106
BCAR1	-0.189112	0.0521973	0.0986714	106	106
BCAR3	-0.113797	0.24544	0.346676	106	106
BCAS1	-0.316714	0.000940682	0.00347364	106	106
BCAS2	0.201425	0.0384077	0.0766336	106	106
BCAS3	-0.281107	0.00351198	0.0105453	106	106
BCAS4	0.149139	0.127053	0.204578	106	106
BCAT1	0.798831	1.07723e-24	2.64059e-22	106	106
BCAT2	-0.35176	0.000217687	0.00101975	106	106
BCCIP	0.228923	0.0182552	0.0417168	106	106
BCDIN3D	0.150224	0.124282	0.201004	106	106
BCKDHA	-0.235364	0.0151525	0.0358585	106	106
BCKDHB	-0.0414033	0.673463	0.754018	106	106
BCKDK	-0.226649	0.0194746	0.0439204	106	106
BCL10	-0.172903	0.0763269	0.135668	106	106
BCL11A	-0.164678	0.0916237	0.1568	106	106
BCL11B	-0.125693	0.199198	0.293251	106	106
BCL2	0.167229	0.0866388	0.149848	106	106
BCL2A1	0.570784	1.67877e-10	3.9847e-09	106	106
BCL2L1	0.0105996	0.914124	0.940493	106	106
BCL2L11	-0.102774	0.294473	0.399647	106	106
BCL2L12	0.029032	0.767672	0.830905	106	106
BCL2L13	-0.111677	0.254404	0.356572	106	106
BCL2L14	-0.0241045	0.806252	0.860028	106	106
BCL2L15	-0.0117607	0.904759	0.933208	106	106
BCL2L2	0.313291	0.00107541	0.00387768	106	106
BCL2L2-PABPN1	0.0842494	0.390537	0.499026	106	106
BCL3	-0.371352	8.88901e-05	0.000476886	106	106
BCL6	0.137355	0.160302	0.246767	106	106
BCL6B	0.565588	2.66484e-10	6.13095e-09	106	106
BCL7A	-0.343467	0.000312656	0.00138568	106	106
BCL7B	-0.00269204	0.978151	0.985755	106	106
BCL7C	0.138522	0.156746	0.242595	106	106
BCL9	-0.399432	2.21942e-05	0.000147038	106	106
BCL9L	-0.308095	0.00131376	0.00457913	106	106
BCLAF1	0.262432	0.00657437	0.0178818	106	106
BCO1	0.0359063	0.714803	0.788043	106	106
BCOR	-0.351089	0.000224244	0.00104539	106	106
BCR	-0.464754	5.1987e-07	5.85538e-06	106	106
BCS1L	-0.186222	0.0559666	0.104725	106	106
BDH1	-0.414117	1.02025e-05	7.57849e-05	106	106
BDH2	0.384644	4.68192e-05	0.0002754	106	106
BDKRB1	0.170835	0.0799647	0.14076	106	106
BDKRB2	-0.102785	0.29442	0.399615	106	106
BDNF-AS	0.125117	0.201281	0.295608	106	106
BDP1	0.0472931	0.630226	0.718052	106	106
BECN1	0.0186056	0.849856	0.891996	106	106
BEND3	-0.435293	3.11352e-06	2.79099e-05	106	106
BEND7	-0.222347	0.0219743	0.0485668	106	106
BET1	0.262649	0.00652825	0.0177698	106	106
BET1L	-0.326109	0.00064618	0.00252443	106	106
BEX2	0.098303	0.316092	0.421935	106	106
BEX3	0.403246	1.8201e-05	0.000123807	106	106
BEX4	0.611246	3.42823e-12	1.06742e-10	106	106
BEX5	0.0500808	0.610178	0.701254	106	105
BFAR	0.333446	0.000477902	0.00196435	106	106
BFSP1	-0.0404357	0.680674	0.760113	106	106
BGN	0.294029	0.00221899	0.00714338	106	106
BHLHB9	0.111456	0.255348	0.357487	106	106
BHLHE40	-0.246686	0.0107971	0.0271244	106	106
BHLHE41	0.234198	0.0156777	0.0367723	106	106
BICC1	0.639391	1.62273e-13	6.06029e-12	106	106
BICD1	-0.036402	0.711039	0.784664	106	106
BICD2	-0.157841	0.106105	0.176803	106	106
BICDL1	0.0075762	0.938561	0.958327	106	106
BICDL2	-0.221266	0.0226435	0.0497441	106	106
BID	0.218233	0.0246166	0.0531945	106	106
BIK	0.0631476	0.520173	0.621143	106	106
BIN1	-0.0628003	0.522476	0.62342	106	106
BIN2	0.516314	1.46952e-08	2.47651e-07	106	106
BIN3	0.0564526	0.565439	0.662603	106	106
BIRC2	0.356779	0.000174011	0.000843587	106	106
BIRC3	0.356434	0.000176728	0.000853993	106	106
BIRC5	-0.117947	0.228534	0.327254	106	106
BIRC6	-0.372625	8.36966e-05	0.000452445	106	106
BISPR	0.0922511	0.346946	0.454526	106	106
BIVM	-0.0464955	0.636013	0.722873	106	106
BIVM-ERCC5	-0.149557	0.12598	0.203215	106	106
BLACAT1	-0.0291027	0.767123	0.830444	106	106
BLCAP	-0.228143	0.0186661	0.0424616	106	106
BLM	0.0936917	0.339435	0.446727	106	106
BLMH	-0.0441626	0.653064	0.737528	106	106
BLNK	-0.177031	0.0694614	0.125584	106	106
BLOC1S1	0.227003	0.0192806	0.0435778	106	106
BLOC1S1-RDH5	0.223293	0.0214019	0.0475367	106	101
BLOC1S2	0.420982	7.00459e-06	5.53877e-05	106	106
BLOC1S3	-0.333833	0.000470256	0.00194245	106	106
BLOC1S4	-0.067795	0.489873	0.59318	106	106
BLOC1S5	0.0599479	0.541575	0.641553	106	106
BLOC1S5-TXNDC5	0.163623	0.0937487	0.159929	106	95
BLOC1S6	0.412666	1.10347e-05	8.09852e-05	106	106
BLVRA	0.471297	3.41327e-07	4.058e-06	106	106
BLVRB	0.150251	0.124212	0.200935	106	106
BLZF1	0.296791	0.002006	0.00657547	106	106
BMF	0.262915	0.00647194	0.0176379	106	106
BMI1	0.51059	2.24887e-08	3.66174e-07	106	106
BMP1	0.253985	0.00861001	0.0224006	106	106
BMP2	-0.0952027	0.331669	0.43869	106	106
BMP2K	-0.0521642	0.595379	0.688768	106	106
BMP4	0.0937713	0.339023	0.446359	106	106
BMP7	-0.00993253	0.919509	0.944592	106	106
BMP8A	0.225741	0.0199809	0.0448955	106	106
BMP8B	-0.0215487	0.826454	0.874382	106	106
BMPR1A	0.363678	0.000127116	0.000646707	106	106
BMPR2	0.114605	0.242082	0.342758	106	106
BMS1	-0.394556	2.84997e-05	0.000181413	106	106
BMS1P20	0.194009	0.0462906	0.0893087	106	106
BMS1P4	-0.190088	0.0509735	0.0966969	106	106
BMS1P5	-0.27972	0.00368491	0.0109714	106	106
BMS1P6	-0.29688	0.00199945	0.00655719	106	106
BMT2	0.531904	4.42757e-09	8.33694e-08	106	106
BNIP1	0.191641	0.0490736	0.0937656	106	106
BNIP2	0.586028	4.12668e-11	1.07198e-09	106	106
BNIP3	0.363331	0.000129161	0.000654888	106	106
BNIP3L	0.440617	2.28082e-06	2.15186e-05	106	106
BOC	0.545081	1.53023e-09	3.1497e-08	106	106
BOD1	0.0890729	0.363881	0.471807	106	106
BOD1L1	-0.238871	0.0136642	0.032926	106	106
BOK	0.175088	0.0726288	0.130134	106	106
BOLA1	0.105682	0.28095	0.385458	106	106
BOLA2	0.107389	0.273208	0.377204	106	106
BOLA2-SMG1P6	0.0518591	0.597536	0.690493	106	106
BOLA2B	0.0828209	0.39865	0.506642	106	106
BOLA3	0.138946	0.155469	0.241137	106	106
BOP1	-0.159058	0.103404	0.173115	106	106
BORA	0.13284	0.17463	0.264267	106	106
BORCS5	-0.11388	0.245093	0.346258	106	106
BORCS6	0.203062	0.0368284	0.0741076	106	106
BORCS7	0.386728	4.22343e-05	0.000251614	106	106
BORCS8	0.0173063	0.860231	0.899529	106	106
BPGM	0.529635	5.2922e-09	9.82775e-08	106	106
BPHL	-0.214265	0.0274175	0.0580834	106	106
BPNT1	0.0162316	0.86883	0.905934	106	106
BPTF	-0.425994	5.29515e-06	4.37079e-05	106	106
BRAF	-0.266699	0.00571819	0.0158888	106	106
BRAP	-0.14008	0.152091	0.23704	106	106
BRAT1	-0.308738	0.00128189	0.00449011	106	106
BRCA1	-0.315228	0.00099718	0.00365226	106	106
BRCA2	-0.0775509	0.429435	0.537421	106	106
BRCC3	-0.297898	0.00192597	0.00636109	106	106
BRD1	-0.375372	7.3435e-05	0.000404774	106	106
BRD2	-0.417321	8.56876e-06	6.5527e-05	106	106
BRD3	-0.368895	9.97731e-05	0.000526268	106	106
BRD4	-0.406359	1.54526e-05	0.000107679	106	106
BRD7	-0.349675	0.000238662	0.00110306	106	106
BRD8	-0.352408	0.000211528	0.000995748	106	106
BRD9	-0.200785	0.0390405	0.0776776	106	106
BRE	-0.241729	0.0125469	0.0306221	106	106
BRF1	-0.327133	0.000619817	0.00243271	106	106
BRF2	0.113232	0.247808	0.349327	106	106
BRI3	0.0370802	0.7059	0.780654	106	106
BRI3BP	-0.216294	0.0259532	0.0555134	106	106
BRICD5	-0.130588	0.182115	0.273173	106	106
BRIP1	-0.189498	0.0517108	0.0978877	106	106
BRIX1	0.14314	0.143249	0.225697	106	106
BRK1	0.349727	0.000238109	0.00110126	106	106
BRMS1	0.186981	0.0549565	0.103078	106	106
BRMS1L	0.366678	0.000110649	0.000573755	106	106
BROX	0.0142969	0.884349	0.917703	106	106
BRPF1	-0.365419	0.0001173	0.000603147	106	106
BRPF3	-0.412804	1.09532e-05	8.05625e-05	106	106
BRWD1	0.0329076	0.737717	0.807232	106	106
BRWD3	-0.0190082	0.846647	0.890019	106	106
BSCL2	0.171218	0.0792808	0.139721	106	106
BSDC1	0.0834845	0.394869	0.503083	106	106
BSG	-0.331318	0.00052199	0.00211335	106	106
BSPRY	-0.35363	0.000200348	0.000951425	106	106
BST1	0.627346	6.21783e-13	2.15498e-11	106	106
BST2	0.316846	0.000935822	0.00345949	106	106
BTAF1	-0.097219	0.321483	0.427609	106	106
BTBD1	0.318363	0.000881451	0.00328734	106	106
BTBD10	0.266855	0.00568886	0.0158139	106	106
BTBD2	-0.43359	3.43566e-06	3.04134e-05	106	106
BTBD3	-0.172596	0.0768571	0.136467	106	106
BTBD6	-0.0311476	0.751275	0.817753	106	106
BTBD7	-0.169863	0.0817212	0.143161	106	106
BTBD9	-0.429206	4.41558e-06	3.75352e-05	106	106
BTC	0.0390693	0.690906	0.768861	106	106
BTD	0.216748	0.0256351	0.0550075	106	106
BTF3	0.0765602	0.43537	0.542834	106	106
BTF3L4	0.337195	0.000408427	0.00172291	106	106
BTG1	0.299283	0.00182989	0.00608549	106	106
BTG2	0.0233002	0.812596	0.865015	106	106
BTG3	0.304895	0.00148351	0.00508793	106	106
BTK	0.673209	2.66726e-15	1.2982e-13	106	106
BTN2A1	-0.153378	0.116485	0.190689	106	106
BTN2A2	0.374266	7.74186e-05	0.00042363	106	106
BTN2A3P	0.040267	0.681934	0.760953	106	106
BTN3A1	0.0505335	0.606949	0.698735	106	106
BTN3A2	0.233241	0.0161206	0.0376474	106	106
BTN3A3	0.228485	0.0184849	0.0421182	106	106
BTNL3	-0.0280963	0.774958	0.836566	106	106
BTNL8	-0.157423	0.107045	0.178038	106	106
BTNL9	-0.130952	0.180891	0.271729	106	106
BTRC	-0.11842	0.226657	0.324842	106	106
BUB1	-0.0446968	0.649143	0.734473	106	106
BUB1B	-0.0726158	0.459459	0.565236	106	106
BUB3	0.15215	0.119475	0.194677	106	106
BUD13	-0.182329	0.0613941	0.113293	106	106
BUD23	-0.0411713	0.675189	0.755526	106	106
BUD31	0.173054	0.076066	0.135365	106	106
BYSL	-0.255819	0.00812617	0.021327	106	106
BZW1	0.384823	4.64061e-05	0.000273447	106	106
BZW2	-0.0924684	0.345807	0.453518	106	106
C10orf10	0.501917	4.22287e-08	6.38976e-07	106	106
C10orf11	0.304964	0.00147967	0.00507865	106	106
C10orf128	0.71008	1.55761e-17	1.07691e-15	106	106
C10orf35	-0.0514616	0.600352	0.692966	106	106
C10orf76	-0.15298	0.117447	0.19186	106	106
C10orf88	0.192267	0.0483246	0.0925312	106	106
C10orf99	-0.0726172	0.45945	0.565236	106	105
C11orf1	0.0746902	0.4467	0.553225	106	106
C11orf24	-0.113753	0.245623	0.346898	106	106
C11orf49	-0.407096	1.48615e-05	0.000104085	106	106
C11orf52	-0.073013	0.457	0.562777	106	106
C11orf54	-0.120283	0.219383	0.316469	106	106
C11orf57	0.189249	0.0520241	0.0984267	106	106
C11orf58	0.390233	3.54575e-05	0.00021762	106	106
C11orf68	0.0672697	0.49325	0.596092	106	106
C11orf71	-0.022774	0.816753	0.867591	106	106
C11orf74	0.358661	0.000159839	0.000783885	106	106
C11orf80	0.0643286	0.512385	0.614578	106	106
C11orf84	-0.0843579	0.389925	0.498574	106	106
C11orf95	0.0944863	0.335337	0.442413	106	106
C11orf96	0.256573	0.00793413	0.0208922	106	106
C11orf98	0.120813	0.217344	0.314368	106	106
C12orf10	-0.0044603	0.963807	0.975846	106	106
C12orf29	0.340637	0.000352956	0.00153205	106	106
C12orf4	0.508569	2.60875e-08	4.18206e-07	106	106
C12orf43	0.156016	0.110258	0.182527	106	106
C12orf45	-0.000190892	0.99845	0.998969	106	106
C12orf49	-0.123237	0.208189	0.30357	106	106
C12orf57	0.38645	4.28192e-05	0.000254761	106	106
C12orf60	0.299141	0.00183957	0.00611317	106	106
C12orf65	-0.0670118	0.494912	0.597833	106	106
C12orf66	-0.139348	0.154265	0.239747	106	106
C12orf73	0.082451	0.400767	0.508723	106	106
C12orf75	0.142051	0.146352	0.229779	106	106
C12orf76	0.307199	0.00135942	0.00470908	106	106
C14orf1	0.0338607	0.730409	0.800534	106	106
C14orf119	0.315887	0.000971739	0.0035717	106	106
C14orf159	-0.157664	0.106502	0.177354	106	106
C14orf166	0.194466	0.0457685	0.0884407	106	106
C14orf2	0.147606	0.131054	0.209767	106	106
C14orf28	0.333649	0.000473861	0.00195251	106	106
C14orf37	0.438236	2.62324e-06	2.41452e-05	106	106
C14orf79	-0.262847	0.00648626	0.0176698	106	106
C14orf80	-0.128933	0.187766	0.279874	106	106
C14orf93	0.102426	0.296121	0.401356	106	106
C15orf38-AP3S2	0.132165	0.176848	0.266845	106	106
C15orf39	-0.254469	0.00848005	0.0221099	106	106
C15orf40	0.278792	0.00380468	0.0112587	106	106
C15orf41	-0.109831	0.262388	0.36537	106	106
C15orf48	0.0489685	0.618143	0.708236	106	106
C15orf52	0.14177	0.147159	0.230805	106	106
C15orf57	0.236018	0.0148646	0.0352948	106	106
C15orf61	0.0317962	0.74627	0.81375	106	106
C15orf62	-0.143204	0.143071	0.225521	106	106
C15orf65	0.228771	0.0183347	0.0418467	106	106
C16orf45	0.688835	3.31058e-16	1.84435e-14	106	106
C16orf52	0.313245	0.00107735	0.00388363	106	106
C16orf54	0.29195	0.00239249	0.00762001	106	106
C16orf58	-0.16875	0.0837706	0.145954	106	106
C16orf59	-0.136946	0.161563	0.248511	106	106
C16orf62	0.181225	0.0630094	0.115672	106	106
C16orf70	-0.100763	0.304076	0.409532	106	106
C16orf72	0.245496	0.0111963	0.0278892	106	106
C16orf87	0.35162	0.00021904	0.00102467	106	106
C16orf91	0.0630892	0.52056	0.621464	106	106
C16orf95	0.0808652	0.409919	0.517901	106	106
C17orf100	-0.0946169	0.334667	0.441788	106	106
C17orf49	0.360938	0.000144123	0.00071992	106	106
C17orf51	-0.0302196	0.758455	0.823381	106	106
C17orf53	-0.407138	1.48288e-05	0.000103909	106	106
C17orf58	-0.12565	0.199351	0.293348	106	106
C17orf62	-0.0748131	0.44595	0.552449	106	106
C17orf75	-0.0527608	0.591171	0.684747	106	106
C17orf80	0.199267	0.0405753	0.0801753	106	106
C18orf21	0.283318	0.00325158	0.00988277	106	106
C18orf25	-0.0760414	0.438497	0.545784	106	106
C18orf32	0.393494	3.00787e-05	0.000189319	106	106
C18orf54	0.0945337	0.335094	0.442135	106	106
C18orf8	-0.014416	0.883393	0.916922	106	106
C19orf12	0.391434	3.33799e-05	0.000207195	106	106
C19orf24	-0.143461	0.142346	0.224668	106	106
C19orf25	-0.093787	0.338943	0.446296	106	106
C19orf33	0.134504	0.169243	0.257971	106	106
C19orf38	0.479039	2.05113e-07	2.61869e-06	106	106
C19orf43	0.0607862	0.535926	0.636259	106	106
C19orf44	-0.053026	0.589305	0.683324	106	106
C19orf47	-0.203302	0.0366012	0.0737604	106	106
C19orf48	-0.126717	0.195533	0.288928	106	106
C19orf53	0.129657	0.185282	0.276967	106	106
C19orf54	-0.407253	1.47387e-05	0.000103332	106	106
C19orf57	-0.415965	9.22752e-06	6.96949e-05	106	106
C19orf60	0.0336343	0.732142	0.802173	106	106
C19orf66	0.173972	0.0744981	0.132978	106	106
C19orf68	-0.21521	0.0267275	0.0568539	106	106
C19orf70	0.0868874	0.375817	0.484116	106	106
C19orf73	-0.225221	0.0202756	0.0454305	106	106
C1D	0.293555	0.0022575	0.00725868	106	106
C1GALT1	0.253683	0.00869213	0.0225794	106	106
C1GALT1C1	0.181006	0.063334	0.116189	106	106
C1QA	0.558512	4.93685e-10	1.09292e-08	106	106
C1QB	0.543397	1.75716e-09	3.57316e-08	106	106
C1QBP	0.00313826	0.97453	0.983629	106	106
C1QC	0.503704	3.71392e-08	5.71588e-07	106	106
C1QTNF1	0.160907	0.0994037	0.167709	106	106
C1QTNF3	0.776568	1.35933e-22	2.26254e-20	106	106
C1QTNF3-AMACR	0.484465	1.42466e-07	1.88491e-06	106	105
C1QTNF5	0.801263	6.1208e-25	1.58694e-22	106	106
C1QTNF6	0.382784	5.1299e-05	0.000297853	106	106
C1R	0.78118	5.22881e-23	9.29442e-21	106	106
C1RL	0.326435	0.000637681	0.00249267	106	106
C1RL-AS1	-0.129016	0.187481	0.279573	106	106
C1S	0.827285	8.47077e-28	4.39242e-25	106	106
C1orf106	-0.426634	5.10788e-06	4.25615e-05	106	106
C1orf109	-0.263197	0.00641283	0.017498	106	106
C1orf112	-0.0416937	0.671305	0.752455	106	106
C1orf115	0.073414	0.454526	0.560702	106	106
C1orf116	-0.226364	0.0196322	0.0441946	106	106
C1orf122	0.167164	0.0867629	0.150005	106	106
C1orf123	0.404481	1.70593e-05	0.000117224	106	106
C1orf131	0.113312	0.24747	0.349214	106	106
C1orf159	-0.307148	0.00136205	0.00471454	106	106
C1orf162	0.730964	5.8361e-19	5.29925e-17	106	106
C1orf174	-0.190427	0.0505541	0.0960259	106	106
C1orf198	-0.0451055	0.64615	0.731743	106	106
C1orf21	0.249139	0.0100131	0.0254422	106	106
C1orf210	-0.298305	0.00189726	0.00627704	106	106
C1orf216	0.350583	0.000229308	0.00106715	106	106
C1orf226	-0.443263	1.95021e-06	1.86922e-05	106	106
C1orf27	-0.0383913	0.696004	0.772549	106	106
C1orf35	-0.127003	0.194517	0.287678	106	106
C1orf43	0.0994352	0.310523	0.416109	106	106
C1orf50	0.134457	0.169394	0.258111	106	106
C1orf52	0.375968	7.137e-05	0.000395158	106	106
C1orf53	0.0826133	0.399837	0.507973	106	106
C1orf54	0.736269	2.41236e-19	2.3231e-17	106	106
C1orf56	-0.170912	0.0798266	0.140554	106	106
C1orf74	0.0322013	0.743148	0.811265	106	106
C2	0.0398567	0.685003	0.76354	106	106
C20orf196	0.0478066	0.626512	0.714969	106	106
C20orf24	0.13027	0.183192	0.274513	106	106
C20orf27	-0.15245	0.118739	0.193712	106	106
C20orf96	-0.177164	0.0692492	0.125234	106	106
C21orf2	0.0219591	0.823202	0.872379	106	106
C21orf33	0.0922933	0.346725	0.454324	106	106
C21orf58	-0.372102	8.57944e-05	0.000462672	106	106
C21orf59	-0.0372214	0.704833	0.779857	106	106
C21orf91	0.451091	1.21746e-06	1.23412e-05	106	106
C22orf23	-0.130124	0.183689	0.275044	106	106
C22orf29	-0.339787	0.00036598	0.00157555	106	106
C22orf39	0.309433	0.00124817	0.0043891	106	106
C22orf46	-0.376701	6.89053e-05	0.000383718	106	106
C2CD2	-0.137627	0.15947	0.245852	106	106
C2CD2L	-0.453929	1.02335e-06	1.05641e-05	106	106
C2CD3	-0.433499	3.45366e-06	3.05527e-05	106	106
C2CD4A	-0.245699	0.0111273	0.0277503	106	106
C2CD4B	-0.177324	0.0689944	0.124823	106	106
C2CD5	0.0926642	0.344782	0.452526	106	106
C2orf15	-0.031449	0.748947	0.815944	106	106
C2orf27A	0.557475	5.39708e-10	1.18507e-08	106	106
C2orf42	0.233181	0.0161486	0.0377062	106	106
C2orf49	0.0466846	0.634639	0.721677	106	106
C2orf54	0.0568837	0.562469	0.659868	106	106
C2orf68	0.0221224	0.821909	0.871295	106	106
C2orf69	0.151775	0.120399	0.195923	106	106
C2orf70	-0.318553	0.000874854	0.00326816	106	106
C2orf72	-0.140592	0.150586	0.23514	106	106
C2orf74	0.627632	6.02646e-13	2.10489e-11	106	106
C2orf76	0.345626	0.000284805	0.00128077	106	106
C2orf81	0.021069	0.830258	0.877443	106	106
C2orf82	-0.231877	0.0167702	0.038915	106	106
C2orf88	0.115776	0.237274	0.337013	106	106
C3	0.358817	0.000158709	0.000779545	106	106
C3AR1	0.696925	1.06667e-16	6.65777e-15	106	106
C3orf14	0.361	0.000143717	0.000718426	106	106
C3orf18	0.610368	3.7521e-12	1.15757e-10	106	106
C3orf33	-0.118429	0.226625	0.32483	106	106
C3orf38	0.34602	0.000279975	0.00126495	106	106
C3orf52	-0.246142	0.010978	0.0274894	106	106
C3orf58	0.215339	0.0266339	0.0567351	106	106
C3orf62	-0.0411122	0.67563	0.755878	106	106
C3orf67	-0.0575063	0.558192	0.656204	106	105
C3orf70	0.0880758	0.369297	0.477452	106	106
C3orf80	0.772752	2.94627e-22	4.67314e-20	106	106
C4A	-0.141229	0.148725	0.232909	106	104
C4B	0.0650236	0.507829	0.610046	106	106
C4BPA	-0.0870836	0.374735	0.483071	106	106
C4BPB	0.0258054	0.792877	0.849863	106	106
C4B_2	0.0650236	0.507829	0.610046	106	106
C4orf19	-0.0906012	0.355675	0.46334	106	106
C4orf3	0.48109	1.78851e-07	2.30523e-06	106	106
C4orf32	0.195346	0.0447771	0.0869839	106	106
C4orf33	-0.000709399	0.994242	0.996237	106	106
C4orf46	-0.00181668	0.985254	0.990249	106	106
C4orf48	-0.00245427	0.98008	0.986888	106	106
C5	0.0390223	0.691259	0.76913	106	106
C5AR1	0.5258	7.13336e-09	1.2909e-07	106	106
C5orf15	0.266677	0.00572242	0.0158973	106	106
C5orf22	0.0310182	0.752274	0.818511	106	106
C5orf24	0.221506	0.0224935	0.0495275	106	106
C5orf30	-0.0585324	0.551179	0.6498	106	106
C5orf34	-0.0804969	0.412061	0.519829	106	106
C5orf42	0.104565	0.286097	0.390757	106	106
C5orf51	-0.00470271	0.961841	0.974417	106	106
C5orf56	0.286308	0.00292688	0.00904014	106	106
C5orf63	-0.20031	0.0395155	0.0784146	106	106
C5orf66	-0.149286	0.126676	0.204069	106	106
C6orf1	0.202818	0.0370604	0.0744854	106	106
C6orf106	0.0488349	0.619104	0.708975	106	106
C6orf120	0.274649	0.00438351	0.0126957	106	106
C6orf132	-0.335435	0.000439795	0.001834	106	106
C6orf136	-0.553033	7.87914e-10	1.68882e-08	106	106
C6orf141	-0.135642	0.16563	0.253532	106	106
C6orf203	0.138837	0.155797	0.241488	106	106
C6orf222	-0.210134	0.0306177	0.0637234	106	106
C6orf223	-0.238346	0.0138786	0.0333073	106	106
C6orf226	0.130456	0.182562	0.273782	106	106
C6orf47	-0.0773552	0.430604	0.538484	106	106
C6orf48	0.147871	0.130356	0.208856	106	106
C6orf62	0.0386697	0.693909	0.770807	106	106
C6orf89	-0.257448	0.00771658	0.0204194	106	106
C7	0.48185	1.69955e-07	2.20532e-06	106	106
C7orf13	-0.165938	0.0891342	0.153396	106	106
C7orf25	0.300547	0.00174604	0.00584556	106	106
C7orf26	-0.236587	0.0146182	0.0348018	106	106
C7orf31	-0.0753062	0.44295	0.549843	106	106
C7orf43	-0.338533	0.000385978	0.00164832	106	106
C7orf49	0.109662	0.263126	0.366171	106	106
C7orf50	0.191279	0.0495117	0.0943836	106	106
C7orf55-LUC7L2	-0.0613015	0.532469	0.632879	106	106
C7orf73	0.280822	0.00354696	0.010622	106	106
C8orf33	-0.102738	0.294646	0.399795	106	106
C8orf37	0.1532	0.116914	0.191174	106	106
C8orf4	0.14931	0.126614	0.203992	106	106
C8orf44	-0.10133	0.301349	0.406645	106	106
C8orf58	0.327296	0.000615708	0.00242011	106	106
C8orf59	0.124271	0.204367	0.299194	106	106
C8orf76	0.111681	0.254384	0.356572	106	106
C8orf82	-0.318135	0.00088944	0.00331163	106	106
C8orf88	0.68363	6.72939e-16	3.58599e-14	106	106
C9orf116	0.00665033	0.946058	0.963131	106	106
C9orf142	-0.0691245	0.48138	0.585156	106	106
C9orf152	-0.409452	1.31117e-05	9.35798e-05	106	106
C9orf16	-0.0755613	0.441401	0.548527	106	106
C9orf3	0.38582	4.4178e-05	0.000262036	106	106
C9orf40	-0.0706075	0.472001	0.576526	106	106
C9orf64	-0.00977361	0.920793	0.945335	106	106
C9orf72	0.13682	0.161953	0.249054	106	106
C9orf78	0.00225093	0.98173	0.987959	106	106
C9orf85	0.0522657	0.594662	0.688234	106	106
CA11	0.433313	3.49087e-06	3.08414e-05	106	106
CA12	-0.00546334	0.955675	0.9697	106	106
CA13	-0.075774	0.440113	0.547179	106	106
CA2	-0.0266822	0.786006	0.844951	106	106
CA4	0.00412742	0.966506	0.977894	106	104
CA5B	0.234931	0.0153457	0.0362141	106	106
CA5BP1	-0.159967	0.101421	0.170218	106	106
CA8	-0.084818	0.387335	0.495842	106	106
CA9	-0.0700746	0.47536	0.57951	106	106
CAAP1	0.079996	0.414986	0.522784	106	106
CAB39	0.2664	0.00577482	0.0160198	106	106
CAB39L	0.160509	0.100255	0.168701	106	106
CABIN1	-0.4398	2.39322e-06	2.23445e-05	106	106
CABLES1	0.00756375	0.938662	0.958352	106	106
CABLES2	-0.446474	1.60975e-06	1.57494e-05	106	106
CACFD1	-0.21086	0.0300332	0.0626404	106	106
CACHD1	-0.132148	0.176904	0.266879	106	106
CACNA1D	-0.350458	0.000230579	0.00107195	106	106
CACNA2D1	0.657346	1.95581e-14	8.31807e-13	106	106
CACNB1	-0.280126	0.00363352	0.0108379	106	106
CACNB2	0.120473	0.218651	0.315751	106	106
CACNB3	-0.089111	0.363675	0.47163	106	106
CACTIN	-0.301293	0.00169823	0.00570248	106	106
CACUL1	-0.0761976	0.437554	0.545103	106	106
CACYBP	0.166491	0.0880571	0.151775	106	106
CAD	-0.429213	4.41376e-06	3.75352e-05	106	106
CADM1	0.502308	4.10604e-08	6.241e-07	106	106
CADM4	0.135976	0.164583	0.252292	106	106
CADPS	0.0188588	0.847837	0.890507	106	106
CADPS2	0.138989	0.15534	0.241028	106	106
CALB2	0.488315	1.09579e-07	1.49551e-06	106	104
CALCOCO1	0.152269	0.119181	0.194269	106	106
CALCOCO2	0.0559694	0.568776	0.665415	106	106
CALCRL	0.778145	9.82975e-23	1.67753e-20	106	106
CALD1	0.696088	1.20132e-16	7.32859e-15	106	106
CALHM2	0.662137	1.08517e-14	4.8126e-13	106	106
CALM1	0.241677	0.0125663	0.0306531	106	106
CALM2	0.364596	0.000121851	0.000623926	106	106
CALM3	-0.0664639	0.498455	0.601256	106	106
CALML4	0.080504	0.41202	0.519825	106	106
CALR	-0.157221	0.107503	0.17858	106	106
CALU	0.684673	5.84437e-16	3.12674e-14	106	106
CAMK1	0.524883	7.65723e-09	1.3783e-07	106	106
CAMK1D	-0.14809	0.129781	0.208199	106	106
CAMK2D	-0.101211	0.301916	0.407299	106	106
CAMK2G	-0.0423195	0.666663	0.748482	106	106
CAMK2N1	-0.233852	0.0158368	0.0370679	106	106
CAMKK1	-0.157387	0.107125	0.17815	106	106
CAMKK2	-0.0536904	0.584642	0.679266	106	106
CAMKMT	-0.210095	0.0306488	0.0637567	106	106
CAMLG	0.395175	2.76156e-05	0.000176703	106	106
CAMSAP1	-0.328908	0.000576441	0.00228778	106	106
CAMSAP2	0.258687	0.0074174	0.0197709	106	106
CAMSAP3	-0.489355	1.0202e-07	1.4035e-06	106	106
CAMTA1	0.199279	0.0405635	0.0801637	106	106
CAMTA2	-0.313703	0.00105832	0.00382938	106	106
CAND1	0.279748	0.00368134	0.0109659	106	106
CANT1	-0.263294	0.00639262	0.017457	106	106
CANX	0.184139	0.05882	0.10926	106	106
CAP1	0.424408	5.78813e-06	4.71325e-05	106	106
CAP2	0.456707	8.61973e-07	9.0861e-06	106	106
CAPG	0.488159	1.10755e-07	1.50675e-06	106	106
CAPN1	-0.431312	3.91586e-06	3.38855e-05	106	106
CAPN10	-0.162673	0.0956975	0.162616	106	106
CAPN10-AS1	-0.183047	0.0603622	0.11174	106	106
CAPN12	-0.11721	0.231473	0.330401	106	106
CAPN13	-0.0716781	0.465292	0.570693	106	105
CAPN15	-0.391087	3.39675e-05	0.000210186	106	106
CAPN2	0.0280894	0.775012	0.836566	106	106
CAPN3	-0.129142	0.187048	0.279143	106	106
CAPN5	-0.477959	2.20383e-07	2.78202e-06	106	106
CAPN6	0.109632	0.26326	0.366319	106	106
CAPN7	0.192247	0.048348	0.0925629	106	106
CAPN8	-0.0634666	0.518064	0.619526	106	106
CAPN9	-0.275649	0.00423696	0.0123242	106	105
CAPNS1	-0.331953	0.000508452	0.00206537	106	106
CAPRIN1	-0.101528	0.300398	0.405808	106	106
CAPRIN2	0.223188	0.0214649	0.0476596	106	106
CAPS	-0.105168	0.283311	0.38817	106	106
CAPZA1	0.24035	0.0130754	0.0316942	106	106
CAPZA2	0.36446	0.000122618	0.000626903	106	106
CAPZB	0.215695	0.0263787	0.0563073	106	106
CARD10	-0.427773	4.78956e-06	4.03328e-05	106	106
CARD11	0.0754523	0.442063	0.549096	106	106
CARD16	0.291048	0.00247156	0.00783484	106	106
CARD19	0.171853	0.0781561	0.138298	106	106
CARD6	0.436725	2.86497e-06	2.6028e-05	106	106
CARD8	0.389042	3.7637e-05	0.000228819	106	106
CARD8-AS1	0.518753	1.22284e-08	2.09483e-07	106	106
CARF	0.0403029	0.681666	0.760717	106	106
CARHSP1	0.127945	0.1912	0.283831	106	106
CARM1	-0.492554	8.17654e-08	1.15369e-06	106	106
CARMIL1	-0.345811	0.000282524	0.00127391	106	106
CARNMT1	0.0092462	0.925055	0.948455	106	106
CARS	-0.0254608	0.795582	0.851949	106	106
CARS2	0.0341301	0.728347	0.798728	106	106
CASC2	0.00228658	0.981441	0.987741	106	106
CASC21	-0.00584031	0.95262	0.967979	106	93
CASC3	-0.325483	0.000662804	0.0025804	106	106
CASC4	0.308188	0.00130909	0.00456758	106	106
CASC9	-0.0292652	0.76586	0.82941	106	104
CASD1	0.257649	0.00766719	0.0203235	106	106
CASK	-0.189493	0.0517174	0.0978877	106	106
CASKIN2	-0.366749	0.000110281	0.00057229	106	106
CASP1	0.184251	0.0586633	0.109014	106	106
CASP10	0.0975228	0.319966	0.426474	106	106
CASP2	-0.491746	8.64858e-08	1.20819e-06	106	106
CASP3	0.164258	0.0924656	0.15798	106	106
CASP4	0.449376	1.35125e-06	1.34945e-05	106	106
CASP5	-0.0532821	0.587506	0.681531	106	106
CASP6	-0.168214	0.0847733	0.147397	106	106
CASP7	-0.0687595	0.483704	0.587254	106	106
CASP8	0.315594	0.000982967	0.00360991	106	106
CASP8AP2	0.239634	0.0133574	0.0322675	106	106
CASP9	0.188193	0.0533726	0.100572	106	106
CAST	-0.0926005	0.345115	0.452875	106	106
CASTOR1	0.26001	0.00710906	0.0190773	106	106
CASZ1	-0.463179	5.74551e-07	6.37014e-06	106	106
CAT	0.13605	0.164349	0.252048	106	106
CAV1	0.630006	4.64466e-13	1.64788e-11	106	106
CAV2	0.521703	9.77301e-09	1.71117e-07	106	106
CBFA2T2	-0.410138	1.26398e-05	9.06916e-05	106	106
CBFB	0.181748	0.0622394	0.114617	106	106
CBL	-0.25952	0.00722185	0.0193376	106	106
CBLB	-0.19671	0.0432763	0.0846072	106	106
CBLC	-0.0564154	0.565695	0.662788	106	106
CBLL1	-0.36896	9.94726e-05	0.000525094	106	106
CBR1	0.0167388	0.86477	0.902461	106	106
CBR3	0.127218	0.193755	0.28693	106	106
CBR3-AS1	-0.278489	0.00384459	0.011356	106	106
CBR4	0.0376526	0.701574	0.777144	106	106
CBS	0.167439	0.0862379	0.149385	106	106
CBWD1	0.10026	0.306505	0.412199	106	106
CBWD2	0.123509	0.207179	0.302522	106	106
CBWD3	-0.14111	0.14907	0.233367	106	106
CBWD5	0.00719986	0.941608	0.960342	106	106
CBWD6	-0.16788	0.0854011	0.148297	106	106
CBX1	0.265802	0.00588942	0.0162941	106	106
CBX2	-0.10778	0.271457	0.375285	106	106
CBX3	0.24763	0.0104892	0.0264844	106	106
CBX4	-0.186672	0.0553651	0.103729	106	106
CBX5	-0.210226	0.0305431	0.0635956	106	106
CBX6	0.213815	0.0277521	0.0586081	106	106
CBX7	0.234272	0.015644	0.0367123	106	106
CBX8	-0.110826	0.258061	0.360724	106	106
CBY1	0.262921	0.00647072	0.0176379	106	106
CC2D1A	-0.567289	2.29289e-10	5.34823e-09	106	106
CC2D1B	-0.292839	0.00231686	0.00741242	106	106
CC2D2A	0.337941	0.000395773	0.00167793	106	106
CCAR1	-0.0349145	0.722355	0.793966	106	106
CCAR2	-0.230075	0.0176632	0.040625	106	106
CCAT1	-0.0426837	0.663967	0.746402	106	106
CCDC102A	0.514552	1.67661e-08	2.79753e-07	106	106
CCDC102B	0.607233	5.16884e-12	1.56247e-10	106	106
CCDC103	0.0341904	0.727886	0.79852	106	106
CCDC106	0.158033	0.105676	0.176196	106	106
CCDC107	0.398903	2.28087e-05	0.000150517	106	106
CCDC112	0.130366	0.182868	0.27418	106	106
CCDC113	-0.34786	0.000258415	0.001181	106	106
CCDC115	0.251318	0.0093593	0.0240576	106	106
CCDC117	-0.0727271	0.458769	0.564646	106	106
CCDC12	0.171848	0.0781656	0.138298	106	106
CCDC120	-0.41309	1.07849e-05	7.94115e-05	106	106
CCDC121	0.120511	0.218505	0.315607	106	106
CCDC122	-0.0118784	0.90381	0.932515	106	106
CCDC124	-0.120946	0.216833	0.313764	106	106
CCDC125	0.00313179	0.974582	0.983629	106	106
CCDC126	0.3927	3.13131e-05	0.0001959	106	106
CCDC127	0.0939185	0.338263	0.445705	106	106
CCDC130	-0.341833	0.000335373	0.00146878	106	106
CCDC134	-0.237125	0.0143885	0.0343215	106	106
CCDC137	-0.0588243	0.549192	0.64807	106	106
CCDC138	0.00830347	0.932677	0.95412	106	106
CCDC14	-0.27787	0.00392728	0.0115649	106	106
CCDC142	-0.318763	0.000867599	0.0032453	106	106
CCDC146	0.00250708	0.979651	0.986677	106	106
CCDC149	0.04485	0.648021	0.733676	106	106
CCDC15	-0.215999	0.0261617	0.0559151	106	106
CCDC150	-0.175855	0.0713645	0.128473	106	106
CCDC159	0.0530009	0.589482	0.683461	106	106
CCDC162P	-0.136438	0.163139	0.250363	106	105
CCDC167	0.229074	0.018177	0.0415995	106	106
CCDC170	0.237594	0.0141906	0.0339457	106	106
CCDC174	-0.201986	0.0378604	0.0757544	106	106
CCDC18	-0.0388854	0.692288	0.769958	106	106
CCDC18-AS1	-0.208092	0.0323124	0.0665703	106	106
CCDC183	-0.222437	0.021919	0.0485001	106	106
CCDC186	-0.0810512	0.408839	0.516796	106	106
CCDC191	-0.0904854	0.356293	0.463886	106	106
CCDC22	-0.287057	0.00285018	0.00884375	106	106
CCDC24	-0.180784	0.0636644	0.116699	106	106
CCDC25	0.259218	0.0072922	0.0194912	106	106
CCDC28A	0.133196	0.173467	0.262951	106	106
CCDC28B	0.395703	2.68803e-05	0.000172654	106	106
CCDC3	0.517568	1.3373e-08	2.27645e-07	106	106
CCDC34	0.0996806	0.309324	0.414998	106	106
CCDC43	-0.00064785	0.994741	0.996441	106	106
CCDC47	-0.0878636	0.370456	0.478618	106	106
CCDC50	0.521375	1.00212e-08	1.75008e-07	106	106
CCDC51	0.146137	0.134974	0.215047	106	106
CCDC57	-0.299628	0.0018067	0.00602619	106	106
CCDC58	0.050349	0.608263	0.699531	106	106
CCDC59	0.143289	0.14283	0.2253	106	106
CCDC6	-0.272093	0.0047785	0.0136462	106	106
CCDC61	-0.134611	0.168901	0.257593	106	106
CCDC66	0.245609	0.011158	0.0278182	106	106
CCDC68	6.7552e-05	0.999452	0.999674	106	106
CCDC69	0.60533	6.26733e-12	1.86526e-10	106	106
CCDC7	0.0931403	0.342298	0.449529	106	106
CCDC71	0.247227	0.0106197	0.0267517	106	106
CCDC71L	0.450195	1.28574e-06	1.29168e-05	106	106
CCDC74A	0.367251	0.000107736	0.000561676	106	106
CCDC77	0.237391	0.0142761	0.0341138	106	106
CCDC80	0.766219	1.07048e-21	1.48786e-19	106	106
CCDC82	0.398255	2.35834e-05	0.000154872	106	106
CCDC84	0.170047	0.0813866	0.142723	106	106
CCDC85B	0.0613679	0.532024	0.632573	106	106
CCDC85C	-0.463234	5.7254e-07	6.36086e-06	106	106
CCDC86	-0.408842	1.35451e-05	9.60628e-05	106	106
CCDC88A	0.676376	1.76569e-15	8.78413e-14	106	106
CCDC88B	-0.170349	0.080839	0.141929	106	106
CCDC88C	-0.474562	2.75786e-07	3.39557e-06	106	106
CCDC9	-0.327829	0.00060246	0.00237774	106	106
CCDC90B	0.371525	8.81678e-05	0.000473577	106	106
CCDC91	0.409004	1.34287e-05	9.54176e-05	106	106
CCDC92	-0.0534459	0.586356	0.680607	106	106
CCDC93	-0.332692	0.000493111	0.00201336	106	106
CCDC94	-0.132523	0.175669	0.265294	106	106
CCDC97	-0.390537	3.49199e-05	0.000215169	106	106
CCHCR1	-0.302689	0.00161184	0.00545865	106	106
CCL11	0.30773	0.00133219	0.00462996	106	106
CCL13	0.553588	7.51778e-10	1.61909e-08	106	106
CCL14	0.707399	2.32518e-17	1.59169e-15	106	105
CCL15	0.00889261	0.927913	0.950617	106	106
CCL15-CCL14	0.00980264	0.920559	0.94531	106	103
CCL17	0.378948	6.18308e-05	0.000349519	106	104
CCL18	0.592766	2.16777e-11	5.90423e-10	106	106
CCL19	0.467119	4.46986e-07	5.10268e-06	106	106
CCL2	0.72054	3.12014e-18	2.47446e-16	106	106
CCL20	-0.00562037	0.954402	0.968941	106	106
CCL21	0.609025	4.30594e-12	1.31341e-10	106	106
CCL22	0.0976824	0.319171	0.425582	106	106
CCL24	0.0205205	0.834614	0.880872	106	106
CCL26	0.27029	0.00507612	0.0143448	106	105
CCL28	-0.15234	0.119007	0.194079	106	106
CCL3	0.483877	1.48253e-07	1.95107e-06	106	106
CCL3L1	0.198339	0.0415386	0.0817434	106	94
CCL4	0.487394	1.16713e-07	1.57985e-06	106	106
CCL4L1	0.293534	0.0022592	0.00726239	106	105
CCL4L2	0.231118	0.0171416	0.0396334	106	103
CCL5	0.368429	0.000101975	0.000536835	106	106
CCL8	0.553353	7.66885e-10	1.64636e-08	106	105
CCM2	0.128009	0.190977	0.283594	106	106
CCNA2	-0.0467205	0.634378	0.721502	106	106
CCNB1	0.0867322	0.376673	0.484895	106	106
CCNB1IP1	0.0351763	0.720359	0.79277	106	106
CCNB2	0.00912131	0.926064	0.949228	106	106
CCNC	0.276313	0.00414222	0.0120825	106	106
CCND1	-0.154084	0.114792	0.18839	106	106
CCND2	0.0856951	0.382428	0.490991	106	106
CCND3	-0.0479927	0.625169	0.714207	106	106
CCNDBP1	0.350759	0.000227533	0.00105999	106	106
CCNE1	0.0707525	0.471089	0.575918	106	106
CCNE2	-0.0447271	0.648921	0.734387	106	106
CCNF	-0.416208	9.10619e-06	6.8933e-05	106	106
CCNG1	0.132714	0.175042	0.264623	106	106
CCNG2	0.180068	0.0647377	0.118377	106	106
CCNH	0.222758	0.0217238	0.0481552	106	106
CCNI	-0.216327	0.0259299	0.05549	106	106
CCNI2	-0.14231	0.145609	0.228852	106	106
CCNJ	0.0988403	0.313441	0.41931	106	106
CCNJL	-0.0627238	0.522983	0.623804	106	106
CCNK	-0.447792	1.48702e-06	1.46986e-05	106	106
CCNL1	-0.0985503	0.31487	0.420721	106	106
CCNL2	-0.213865	0.0277144	0.0585743	106	106
CCNO	-0.320128	0.000821839	0.00310018	106	106
CCNT1	-0.048463	0.621778	0.711493	106	106
CCNT2	0.214807	0.0270195	0.0574026	106	106
CCNY	0.421596	6.77037e-06	5.38196e-05	106	106
CCNYL1	0.049719	0.612764	0.703687	106	106
CCP110	-0.155547	0.111346	0.183966	106	106
CCPG1	0.561218	3.9064e-10	8.80704e-09	106	106
CCR1	0.726728	1.1642e-18	9.93401e-17	106	106
CCR2	0.681119	9.42691e-16	4.92611e-14	106	106
CCR4	0.438178	2.63204e-06	2.41889e-05	106	106
CCR5	0.530529	4.93396e-09	9.21324e-08	106	106
CCR6	0.200124	0.0397026	0.0787393	106	106
CCR7	0.330329	0.000543735	0.00218174	106	106
CCR8	0.549406	1.06885e-09	2.25866e-08	106	106
CCRL2	0.123228	0.208223	0.303587	106	106
CCS	-0.159332	0.102803	0.172279	106	106
CCSAP	0.0250938	0.798465	0.853966	106	106
CCSER1	0.0178259	0.85608	0.896579	106	106
CCSER2	-0.00855679	0.930628	0.952603	106	106
CCT2	0.246124	0.010984	0.0274894	106	106
CCT3	0.0892671	0.362832	0.470726	106	106
CCT4	0.110278	0.260439	0.363294	106	106
CCT5	0.158917	0.103714	0.173551	106	106
CCT6A	0.245824	0.011085	0.0276703	106	106
CCT6B	-0.0285715	0.771256	0.833646	106	106
CCT6P1	0.0633988	0.518511	0.619896	106	106
CCT6P3	-0.045214	0.645356	0.731151	106	106
CCT7	0.155154	0.112263	0.185163	106	106
CCT8	0.227403	0.0190629	0.043158	106	106
CCZ1	0.137957	0.158462	0.244689	106	106
CCZ1B	0.158469	0.104704	0.174856	106	106
CD109	0.480347	1.87964e-07	2.41576e-06	106	106
CD14	0.569254	1.92505e-10	4.54784e-09	106	106
CD151	0.285732	0.00298705	0.00920948	106	106
CD163	0.548016	1.20009e-09	2.50459e-08	106	106
CD163L1	-0.0222204	0.821133	0.870869	106	106
CD164	0.1778	0.0682402	0.123641	106	106
CD177	0.00621771	0.949562	0.965532	106	106
CD180	0.629663	4.82356e-13	1.70686e-11	106	106
CD1D	0.437453	2.74602e-06	2.50995e-05	106	106
CD2	0.406671	1.51997e-05	0.000106068	106	106
CD200	0.287567	0.00279906	0.00871522	106	106
CD200R1	0.513219	1.85154e-08	3.06289e-07	106	106
CD209	0.183931	0.0591107	0.109664	106	106
CD226	0.555687	6.28924e-10	1.36981e-08	106	106
CD24	-0.138942	0.155481	0.241137	106	106
CD247	0.389811	3.62151e-05	0.000221429	106	106
CD248	0.186624	0.0554297	0.103806	106	106
CD27	0.403705	1.77684e-05	0.000121293	106	106
CD27-AS1	0.1904	0.0505874	0.096059	106	106
CD274	0.28287	0.00330286	0.0100268	106	106
CD276	0.107739	0.271642	0.375396	106	106
CD28	0.469761	3.77058e-07	4.41659e-06	106	106
CD2AP	-0.117255	0.231292	0.330187	106	106
CD2BP2	0.266559	0.00574467	0.015946	106	106
CD300A	0.5027	3.99207e-08	6.10908e-07	106	106
CD300E	0.535442	3.34361e-09	6.4768e-08	106	106
CD300LF	0.538632	2.58857e-09	5.1022e-08	106	106
CD302	0.519449	1.1601e-08	2.00006e-07	106	106
CD320	-0.159145	0.103212	0.172836	106	106
CD33	0.57794	8.7671e-11	2.1648e-09	106	106
CD34	0.487048	1.195e-07	1.61271e-06	106	106
CD36	0.622785	1.01857e-12	3.41601e-11	106	106
CD37	0.396846	2.53543e-05	0.000164049	106	106
CD38	0.294825	0.00215563	0.00697269	106	106
CD3D	0.397603	2.43875e-05	0.000159067	106	106
CD3E	0.246509	0.0108558	0.0272293	106	106
CD3EAP	-0.194489	0.0457423	0.0884154	106	106
CD3G	0.310317	0.00120652	0.00426901	106	106
CD4	0.217075	0.0254073	0.0546057	106	106
CD40	0.407835	1.42902e-05	0.000100764	106	106
CD44	-0.175392	0.0721252	0.12948	106	106
CD46	0.036212	0.712481	0.786126	106	106
CD47	0.208839	0.0316834	0.0654946	106	106
CD48	0.586898	3.80062e-11	9.91102e-10	106	106
CD5	0.150124	0.124534	0.201363	106	106
CD52	0.535299	3.38187e-09	6.54152e-08	106	106
CD53	0.682647	7.68126e-16	4.06113e-14	106	106
CD55	0.105791	0.280452	0.384944	106	106
CD58	0.288534	0.00270434	0.0084751	106	106
CD59	0.567961	2.16005e-10	5.05587e-09	106	106
CD6	0.251035	0.00944184	0.0242387	106	106
CD63	0.505736	3.20659e-08	5.03861e-07	106	106
CD68	0.488312	1.09595e-07	1.49551e-06	106	106
CD69	0.54284	1.83911e-09	3.72856e-08	106	106
CD7	0.110517	0.259401	0.362184	106	106
CD70	0.455102	9.51996e-07	9.9034e-06	106	106
CD72	0.493974	7.40662e-08	1.05333e-06	106	106
CD74	0.123651	0.206651	0.301915	106	106
CD79A	0.37961	5.98796e-05	0.000340632	106	106
CD79B	0.539751	2.36466e-09	4.70212e-08	106	106
CD80	0.48775	1.13899e-07	1.54682e-06	106	106
CD81	0.111879	0.25354	0.355694	106	106
CD82	0.377209	6.7244e-05	0.00037602	106	106
CD83	0.482957	1.57751e-07	2.05886e-06	106	106
CD84	0.614319	2.4933e-12	7.87228e-11	106	106
CD86	0.702907	4.50528e-17	2.9202e-15	106	106
CD8A	0.344008	0.000305444	0.00135899	106	106
CD8B	0.430313	4.14579e-06	3.5601e-05	106	106
CD9	0.327658	0.000606699	0.00239167	106	106
CD93	0.384039	4.82349e-05	0.000282756	106	106
CD96	0.409706	1.29349e-05	9.2546e-05	106	106
CD99	0.213175	0.0282333	0.059503	106	106
CD99L2	0.373367	8.08005e-05	0.000439787	106	106
CD99P1	-0.128939	0.187745	0.279874	106	106
CDA	0.0544015	0.57967	0.674938	106	106
CDADC1	-0.0101707	0.917586	0.942976	106	106
CDAN1	-0.372072	8.59172e-05	0.000463149	106	106
CDC123	0.24109	0.0127893	0.0311066	106	106
CDC14A	-0.101584	0.300129	0.405557	106	106
CDC14B	-0.343161	0.000316799	0.00139944	106	106
CDC16	0.136438	0.163139	0.250363	106	106
CDC20	-0.23492	0.0153508	0.0362198	106	106
CDC23	0.148452	0.128834	0.207025	106	106
CDC25A	-0.103049	0.29318	0.398412	106	106
CDC25B	-0.331168	0.000525247	0.00212208	106	106
CDC25C	0.0472711	0.630386	0.718112	106	106
CDC26	0.288475	0.00271011	0.00848529	106	106
CDC27	0.315144	0.00100047	0.00366331	106	106
CDC34	-0.181647	0.0623874	0.114759	106	106
CDC37	-0.138348	0.157274	0.243301	106	106
CDC37L1	0.298292	0.00189817	0.0062785	106	106
CDC37L1-AS1	0.257946	0.00759497	0.0201685	106	103
CDC40	0.199803	0.0400278	0.079291	106	106
CDC42	0.381886	5.36018e-05	0.000309623	106	106
CDC42BPA	-0.057353	0.559244	0.657097	106	106
CDC42BPB	-0.405146	1.64737e-05	0.000113605	106	106
CDC42BPG	-0.506211	3.09793e-08	4.88495e-07	106	106
CDC42EP1	-0.360964	0.000143952	0.000719336	106	106
CDC42EP2	-0.0882975	0.368089	0.4763	106	106
CDC42EP3	0.376109	7.08914e-05	0.00039267	106	106
CDC42EP4	-0.349444	0.000241096	0.00111241	106	106
CDC42EP5	-0.0780187	0.426648	0.534878	106	106
CDC42SE1	0.338034	0.000394218	0.00167291	106	106
CDC42SE2	0.110506	0.259447	0.362202	106	106
CDC45	-0.0429118	0.66228	0.745186	106	106
CDC5L	0.189852	0.0512667	0.0971302	106	106
CDC6	-0.0595519	0.544254	0.6436	106	106
CDC7	-0.0835556	0.394465	0.50281	106	106
CDC73	0.195501	0.0446046	0.0867081	106	106
CDCA2	-0.0686488	0.484409	0.587779	106	106
CDCA3	-0.220292	0.0232621	0.0507886	106	106
CDCA4	-0.0302194	0.758456	0.823381	106	106
CDCA5	-0.147955	0.130134	0.208642	106	106
CDCA7	-0.272785	0.00466863	0.0133835	106	106
CDCA7L	-0.136491	0.162975	0.250304	106	106
CDCA8	-0.346855	0.000269999	0.00122646	106	106
CDCP1	-0.438381	2.60101e-06	2.4002e-05	106	106
CDH1	-0.433352	3.48296e-06	3.07916e-05	106	106
CDH11	0.546958	1.31032e-09	2.722e-08	106	106
CDH13	0.153946	0.115122	0.188839	106	106
CDH17	-0.190442	0.0505346	0.096013	106	106
CDH24	-0.224806	0.0205137	0.0458574	106	106
CDH3	-0.322099	0.000759646	0.00289473	106	106
CDH5	0.171701	0.0784245	0.138647	106	106
CDHR1	-0.175342	0.0722081	0.129571	106	106
CDHR2	-0.10226	0.29691	0.402103	106	106
CDHR5	-0.338134	0.000392547	0.00167055	106	106
CDIP1	0.165528	0.0899375	0.154483	106	106
CDIPT	0.19795	0.0419483	0.0824151	106	106
CDK1	0.116739	0.233367	0.332691	106	106
CDK10	-0.0646161	0.510497	0.612869	106	106
CDK11A	-0.363405	0.000128724	0.000653412	106	106
CDK11B	-0.334323	0.000460724	0.00191358	106	106
CDK12	-0.414593	9.94225e-06	7.4138e-05	106	106
CDK13	-0.331079	0.000527174	0.00212668	106	106
CDK14	0.803247	3.83777e-25	1.01453e-22	106	106
CDK16	-0.294123	0.00221139	0.0071257	106	106
CDK17	0.531429	4.59647e-09	8.63086e-08	106	106
CDK18	-0.37904	6.15578e-05	0.000348707	106	106
CDK19	-0.0474169	0.62933	0.717274	106	106
CDK2	-0.0323982	0.741633	0.810071	106	106
CDK20	-0.0156574	0.873432	0.908892	106	106
CDK2AP1	0.378972	6.17585e-05	0.000349403	106	106
CDK2AP2	-0.269404	0.00522814	0.0147152	106	106
CDK3	-0.201855	0.0379869	0.0759626	106	106
CDK4	0.210129	0.0306217	0.0637234	106	106
CDK5	-0.0265814	0.786795	0.845255	106	106
CDK5RAP1	-0.221877	0.0222631	0.0491245	106	106
CDK5RAP2	-0.420183	7.32128e-06	5.74537e-05	106	106
CDK5RAP3	-0.307878	0.00132468	0.00460766	106	106
CDK6	-0.261612	0.00675119	0.018266	106	106
CDK7	0.239122	0.0135624	0.032704	106	106
CDK8	0.15332	0.116624	0.190793	106	106
CDK9	-0.154308	0.11426	0.187722	106	106
CDKAL1	-0.302765	0.00160726	0.00544861	106	106
CDKL1	0.0637373	0.516277	0.618047	106	106
CDKL5	0.0527579	0.591192	0.684747	106	106
CDKN1A	-0.0543675	0.579907	0.675039	106	106
CDKN1B	0.242736	0.0121726	0.0298982	106	106
CDKN1C	0.370375	9.30777e-05	0.000495997	106	106
CDKN2A	0.339102	0.000376772	0.00161515	106	106
CDKN2AIP	0.106511	0.277175	0.381391	106	106
CDKN2AIPNL	0.137758	0.159068	0.245372	106	106
CDKN2B	0.357418	0.000169071	0.000823193	106	106
CDKN2C	0.149329	0.126566	0.20394	106	106
CDKN2D	0.0513501	0.601142	0.693531	106	106
CDKN3	0.0209846	0.830928	0.877807	106	106
CDPF1	0.256777	0.00788303	0.0207698	106	106
CDR2	0.100447	0.305602	0.411109	106	106
CDR2L	0.106887	0.275472	0.379442	106	106
CDS1	-0.0678898	0.489265	0.59271	106	106
CDS2	0.208908	0.0316259	0.0653857	106	106
CDT1	-0.33809	0.000393289	0.00167199	106	106
CDV3	0.126555	0.196107	0.289554	106	106
CDX1	-0.0253127	0.796745	0.852991	106	106
CDX2	-0.156128	0.11	0.182198	106	106
CDYL	-0.183379	0.05989	0.110973	106	106
CDYL2	0.2653	0.00598733	0.016522	106	106
CEACAM1	-0.287552	0.00280052	0.00871777	106	106
CEACAM19	-0.145766	0.135979	0.216341	106	106
CEACAM21	0.401218	2.02312e-05	0.000135345	106	106
CEACAM5	-0.277865	0.00392788	0.0115649	106	106
CEACAM6	-0.0558753	0.569428	0.666061	106	106
CEACAM7	-0.150319	0.124042	0.200785	106	106
CEBPA	0.0862023	0.379607	0.488206	106	106
CEBPA-AS1	-0.216537	0.0257823	0.0552617	106	106
CEBPB	0.141708	0.147337	0.231031	106	106
CEBPD	0.177909	0.0680687	0.123413	106	106
[truncated: 11,484 more rows]
