# Supplementary material for: Lumican inhibits immune escape and carcinogenic pathways in colorectal adenocarcinoma
Source: Aging (Albany NY). 2021 Jan 20;13(3):4388–408. doi: 10.18632/aging.202401 (PMC7906189; doi:10.18632/aging.202401)
Supplement: Supplementary Table 4 [file aging-13-202401-s005.xlsx]

## Sheet: Sheet1
Supplementary Table 4. Results of miRNA related to LUM in COAD.
Query	Statistic	P-value	FDR (BH)	Event_SD	Event_TD
hsa-let-7a-2-3p	0.324367	0.00073616	0.00547415	105	67
hsa-let-7a-3p	0.0104361	0.915851	0.96013	105	104
hsa-let-7a-5p	0.0754205	0.444468	0.657259	105	105
hsa-let-7b-3p	0.223686	0.0218014	0.0798577	105	105
hsa-let-7b-5p	0.0891318	0.365891	0.581778	105	105
hsa-let-7c-3p	0.387828	4.35728e-05	0.000468407	105	80
hsa-let-7c-5p	0.579362	9.47888e-11	7.21124e-09	105	105
hsa-let-7d-3p	0.0630668	0.52273	0.724556	105	105
hsa-let-7d-5p	0.0699271	0.478429	0.686744	105	105
hsa-let-7e-3p	0.464206	6.10526e-07	1.2847e-05	105	105
hsa-let-7e-5p	0.349562	0.000257098	0.00215483	105	105
hsa-let-7f-1-3p	-0.116496	0.236621	0.439058	105	105
hsa-let-7f-2-3p	-0.0204252	0.836156	0.911762	105	103
hsa-let-7f-5p	-0.0468938	0.634767	0.80426	105	105
hsa-let-7g-3p	0.245739	0.0115104	0.0512785	105	104
hsa-let-7g-5p	-0.102725	0.297051	0.511929	105	105
hsa-let-7i-3p	0.459922	7.98006e-07	1.60654e-05	105	105
hsa-let-7i-5p	0.439504	2.72333e-06	4.48895e-05	105	105
hsa-miR-1-3p	0.156497	0.110877	0.266806	105	98
hsa-miR-100-3p	0.243607	0.012273	0.0518383	105	91
hsa-miR-100-5p	0.576424	1.23852e-10	8.16595e-09	105	105
hsa-miR-101-3p	0.104232	0.289983	0.504385	105	105
hsa-miR-101-5p	0.0984821	0.317556	0.53412	105	100
hsa-miR-103a-2-5p	0.121091	0.21851	0.41559	105	98
hsa-miR-103a-3p	-0.0585098	0.553263	0.745256	105	105
hsa-miR-103b	-0.0585098	0.553263	0.745256	105	105
hsa-miR-105-5p	0.17941	0.0670576	0.183204	105	55
hsa-miR-106a-5p	-0.217729	0.0256686	0.090665	105	105
hsa-miR-106b-3p	-0.0186837	0.849955	0.917827	105	105
hsa-miR-106b-5p	-0.202584	0.0382132	0.122704	105	105
hsa-miR-107	-0.157829	0.107835	0.263091	105	105
hsa-miR-10a-3p	-0.132819	0.176794	0.357565	105	105
hsa-miR-10a-5p	-0.11395	0.247092	0.453114	105	105
hsa-miR-10b-3p	0.130553	0.184362	0.365398	105	105
hsa-miR-10b-5p	0.169886	0.0831683	0.214371	105	105
hsa-miR-1179	0.143467	0.144273	0.311141	105	59
hsa-miR-1180-3p	-0.0510129	0.605292	0.784578	105	105
hsa-miR-1185-1-3p	0.3128	0.00115891	0.0081288	105	105
hsa-miR-1185-2-3p	0.0894129	0.364375	0.580301	105	101
hsa-miR-1185-5p	0.172859	0.0778382	0.203119	105	87
hsa-miR-1197	0.258782	0.0076862	0.0380083	105	68
hsa-miR-122-5p	-0.0789699	0.423267	0.640078	105	69
hsa-miR-1226-3p	0.0757406	0.442532	0.657154	105	105
hsa-miR-1226-5p	0.0511214	0.604523	0.784578	105	65
hsa-miR-1227-3p	0.022693	0.818262	0.902187	105	104
hsa-miR-1228-3p	0.19124	0.0506726	0.151677	105	85
hsa-miR-1229-3p	0.082497	0.402789	0.622435	105	98
hsa-miR-1233-3p	0.303849	0.00162654	0.0109432	105	79
hsa-miR-1234-3p	0.0494081	0.616704	0.791077	105	96
hsa-miR-1237-3p	-0.0629964	0.523195	0.724556	105	101
hsa-miR-124-3p	0.152469	0.120487	0.277704	105	54
hsa-miR-1245a	0.350324	0.000248701	0.00210227	105	59
hsa-miR-1245b-3p	0.424474	6.39763e-06	9.30479e-05	105	84
hsa-miR-1245b-5p	0.264731	0.0063511	0.0326269	105	67
hsa-miR-1246	-0.0371939	0.706403	0.8531	105	105
hsa-miR-1247-3p	0.0347612	0.724809	0.86461	105	103
hsa-miR-1247-5p	0.0724334	0.462765	0.672879	105	105
hsa-miR-1248	0.0408903	0.678758	0.833722	105	59
hsa-miR-1249-3p	0.270293	0.0052931	0.0284504	105	103
hsa-miR-1254	-0.0505489	0.608581	0.785514	105	105
hsa-miR-1255a	-0.0234014	0.812691	0.900534	105	91
hsa-miR-125a-3p	0.261476	0.00705354	0.0355916	105	105
hsa-miR-125a-5p	0.402774	2.04725e-05	0.000253091	105	105
hsa-miR-125b-1-3p	0.609143	5.38945e-12	7.61453e-10	105	105
hsa-miR-125b-2-3p	0.631446	5.13358e-13	1.05221e-10	105	105
hsa-miR-125b-5p	0.631121	5.31957e-13	1.05221e-10	105	105
hsa-miR-126-3p	0.224467	0.0213337	0.0787278	105	105
hsa-miR-126-5p	0.143952	0.142908	0.309946	105	105
hsa-miR-1260a	-0.0188463	0.848665	0.917827	105	105
hsa-miR-1260b	-0.0178167	0.856842	0.924064	105	105
hsa-miR-1262	0.184362	0.0597406	0.169294	105	99
hsa-miR-1266-5p	-0.0278947	0.777584	0.889931	105	105
hsa-miR-1268b	-0.0569517	0.563896	0.75466	105	96
hsa-miR-1269a	0.00389426	0.96855	0.983508	105	78
hsa-miR-1269b	-0.140859	0.151785	0.321451	105	54
hsa-miR-127-3p	0.182584	0.0622887	0.173911	105	105
hsa-miR-127-5p	0.46879	4.56567e-07	1.02624e-05	105	105
hsa-miR-1270	0.267451	0.00581235	0.0305767	105	99
hsa-miR-1271-5p	0.39119	3.68799e-05	0.000409823	105	103
hsa-miR-1273d	-0.168181	0.0863545	0.220684	105	66
hsa-miR-1273h-3p	0.142339	0.147487	0.314364	105	104
hsa-miR-1275	0.0338492	0.731751	0.865672	105	105
hsa-miR-1276	-0.144385	0.141695	0.309048	105	104
hsa-miR-1277-5p	0.0212048	0.829995	0.909042	105	80
hsa-miR-1278	0.00899986	0.927398	0.96547	105	63
hsa-miR-128-1-5p	-0.000227976	0.998158	0.998738	105	105
hsa-miR-128-3p	-0.100678	0.306833	0.523203	105	105
hsa-miR-1284	0.00110258	0.991093	0.994109	105	70
hsa-miR-1285-3p	-0.117745	0.2316	0.434635	105	105
hsa-miR-1286	-0.0723426	0.463327	0.672879	105	93
hsa-miR-1287-5p	0.161398	0.100003	0.248676	105	105
hsa-miR-129-2-3p	0.161571	0.0996333	0.248676	105	84
hsa-miR-129-5p	0.18912	0.0533378	0.156477	105	96
hsa-miR-1291	-0.0411112	0.677119	0.833722	105	99
hsa-miR-1292-5p	0.0105234	0.91515	0.96013	105	100
hsa-miR-1294	-0.0420228	0.670371	0.826935	105	102
hsa-miR-1295a	0.138741	0.158099	0.331433	105	89
hsa-miR-1295b-5p	0.0970605	0.324626	0.540497	105	88
hsa-miR-1296-5p	0.0668598	0.497983	0.701276	105	105
hsa-miR-1299	0.00327235	0.973571	0.985529	105	83
hsa-miR-1301-3p	0.0781379	0.428184	0.642733	105	105
hsa-miR-1304-3p	-0.168896	0.0850056	0.218365	105	105
hsa-miR-1304-5p	-0.131992	0.17953	0.360885	105	83
hsa-miR-1306-3p	0.206104	0.0349138	0.113212	105	79
hsa-miR-1306-5p	0.158255	0.106876	0.261634	105	105
hsa-miR-1307-3p	-0.117506	0.232556	0.435602	105	105
hsa-miR-1307-5p	-0.106954	0.2775	0.490085	105	105
hsa-miR-130a-3p	0.494523	8.23808e-08	2.62821e-06	105	105
hsa-miR-130b-3p	-0.144787	0.140577	0.309048	105	105
hsa-miR-130b-5p	-0.100405	0.30815	0.523643	105	105
hsa-miR-132-3p	0.201284	0.0394964	0.125599	105	105
hsa-miR-132-5p	0.220488	0.0238101	0.0855434	105	105
hsa-miR-1322	-0.182412	0.0625391	0.173911	105	64
hsa-miR-133a-3p	0.344049	0.000326135	0.00264383	105	105
hsa-miR-133a-5p	0.269193	0.00548895	0.0290298	105	76
hsa-miR-133b	0.330203	0.000581522	0.00452854	105	99
hsa-miR-134-3p	0.483808	1.70958e-07	4.6966e-06	105	92
hsa-miR-134-5p	0.497211	6.83208e-08	2.32997e-06	105	105
hsa-miR-1343-3p	0.0122153	0.901572	0.950599	105	103
hsa-miR-135a-5p	0.0503514	0.609984	0.785514	105	76
hsa-miR-135b-3p	-0.150308	0.125899	0.285583	105	103
hsa-miR-135b-5p	-0.0911147	0.35528	0.568563	105	105
hsa-miR-136-3p	0.308493	0.00136598	0.00931696	105	105
hsa-miR-136-5p	0.243357	0.0123653	0.0518383	105	103
hsa-miR-138-1-3p	0.254785	0.00871696	0.0416477	105	80
hsa-miR-138-5p	0.243912	0.0121615	0.0517191	105	104
hsa-miR-139-3p	0.256801	0.00818275	0.0398657	105	92
hsa-miR-139-5p	0.432736	4.02099e-06	6.21369e-05	105	105
hsa-miR-140-3p	0.47721	2.64748e-07	6.5459e-06	105	105
hsa-miR-140-5p	0.0871147	0.376882	0.592586	105	105
hsa-miR-141-3p	-0.190086	0.0521093	0.153839	105	105
hsa-miR-141-5p	-0.150334	0.125834	0.285583	105	105
hsa-miR-142-3p	0.0541057	0.583566	0.766463	105	105
hsa-miR-142-5p	0.0125791	0.898656	0.950599	105	105
hsa-miR-143-3p	0.413016	1.19431e-05	0.000166363	105	105
hsa-miR-143-5p	0.4433	2.18062e-06	3.65531e-05	105	105
hsa-miR-144-3p	-0.056493	0.567045	0.756482	105	94
hsa-miR-144-5p	-0.0304852	0.75754	0.880385	105	102
hsa-miR-145-3p	0.37268	9.03512e-05	0.000867547	105	105
hsa-miR-145-5p	0.514458	1.978e-08	7.36374e-07	105	105
hsa-miR-1468-5p	-0.0856951	0.384736	0.6012	105	105
hsa-miR-146a-5p	-0.17389	0.0760549	0.200582	105	105
hsa-miR-146b-3p	0.412299	1.24093e-05	0.000170045	105	105
hsa-miR-146b-5p	0.210306	0.0312921	0.105566	105	105
hsa-miR-147b	-0.118358	0.229162	0.431697	105	105
hsa-miR-148a-3p	-0.188574	0.054042	0.157662	105	105
hsa-miR-148a-5p	-0.238405	0.0143213	0.0575763	105	105
hsa-miR-148b-3p	-0.0425216	0.666689	0.82626	105	105
hsa-miR-148b-5p	-0.165536	0.0914888	0.231413	105	105
hsa-miR-149-5p	0.386056	4.75424e-05	0.000505586	105	105
hsa-miR-150-3p	0.193683	0.0477387	0.145721	105	103
hsa-miR-150-5p	0.2771	0.00421375	0.0235446	105	105
hsa-miR-151a-3p	-0.152817	0.119632	0.27672	105	105
hsa-miR-151a-5p	-0.0780018	0.428991	0.642837	105	105
hsa-miR-151b	0.152366	0.120741	0.277704	105	105
hsa-miR-152-3p	0.599485	1.41073e-11	1.55024e-09	105	105
hsa-miR-152-5p	0.552599	9.85278e-10	5.40676e-08	105	105
hsa-miR-153-3p	-0.040769	0.679658	0.833722	105	75
hsa-miR-1538	0.053446	0.58817	0.769182	105	96
hsa-miR-154-5p	0.571392	1.94599e-10	1.20287e-08	105	104
hsa-miR-155-5p	0.16985	0.0832342	0.214371	105	105
hsa-miR-15a-5p	-0.0359453	0.71583	0.858436	105	105
hsa-miR-15b-3p	-0.233938	0.0163107	0.064013	105	105
hsa-miR-15b-5p	-0.198892	0.0419512	0.131297	105	105
hsa-miR-16-1-3p	-0.18923	0.0531964	0.156477	105	58
hsa-miR-16-2-3p	-0.243848	0.0121846	0.0517191	105	105
hsa-miR-16-5p	-0.129659	0.187412	0.369321	105	105
hsa-miR-17-3p	-0.24179	0.0129573	0.0527356	105	105
hsa-miR-17-5p	-0.354808	0.000204201	0.00178721	105	105
hsa-miR-181a-2-3p	0.123441	0.20964	0.403374	105	105
hsa-miR-181a-3p	0.393116	3.34927e-05	0.000380739	105	105
hsa-miR-181a-5p	0.286005	0.00310008	0.0184209	105	105
hsa-miR-181b-2-3p	-0.0443862	0.652999	0.815424	105	60
hsa-miR-181b-3p	0.050406	0.609596	0.785514	105	77
hsa-miR-181b-5p	0.185804	0.0577369	0.166128	105	105
hsa-miR-181c-3p	0.132929	0.176434	0.357565	105	105
hsa-miR-181c-5p	0.154155	0.116389	0.273417	105	105
hsa-miR-181d-5p	-0.00224654	0.981854	0.991883	105	105
hsa-miR-182-3p	-0.0546998	0.579434	0.76408	105	83
hsa-miR-182-5p	-0.306379	0.00147951	0.0100222	105	105
hsa-miR-183-3p	-0.183293	0.0612624	0.172555	105	105
hsa-miR-183-5p	-0.250374	0.00999422	0.0458797	105	105
hsa-miR-184	0.148359	0.130942	0.294322	105	81
hsa-miR-185-3p	0.14454	0.141264	0.309048	105	105
hsa-miR-185-5p	-0.158608	0.106086	0.260345	105	105
hsa-miR-186-5p	-0.056253	0.568696	0.756985	105	105
hsa-miR-187-3p	0.276923	0.0042391	0.0235532	105	95
hsa-miR-188-3p	-0.137484	0.161939	0.33576	105	98
hsa-miR-188-5p	-0.200386	0.0404034	0.126854	105	105
hsa-miR-18a-3p	-0.0829106	0.400426	0.621698	105	105
hsa-miR-18a-5p	-0.248628	0.0105434	0.0476586	105	105
hsa-miR-18b-5p	0.0324642	0.742334	0.870488	105	60
hsa-miR-1908-3p	-0.080108	0.416595	0.633673	105	64
hsa-miR-1908-5p	0.0139511	0.887671	0.943986	105	102
hsa-miR-190a-5p	-0.179728	0.0665661	0.182365	105	105
hsa-miR-190b	-0.207939	0.0332906	0.110807	105	105
hsa-miR-191-3p	-0.244049	0.0121115	0.0517191	105	105
hsa-miR-191-5p	-0.320519	0.00085782	0.00619258	105	105
hsa-miR-1910-5p	-0.0121755	0.901891	0.950599	105	87
hsa-miR-192-3p	-0.259203	0.0075842	0.0376923	105	105
hsa-miR-192-5p	-0.225538	0.0207058	0.0781603	105	105
hsa-miR-193a-3p	0.248376	0.0106249	0.0477639	105	105
hsa-miR-193a-5p	0.250633	0.00991495	0.0458219	105	105
hsa-miR-193b-3p	0.458166	8.89668e-07	1.62941e-05	105	105
hsa-miR-193b-5p	0.400348	2.32007e-05	0.000277955	105	105
hsa-miR-194-3p	-0.265691	0.00615605	0.0320439	105	105
hsa-miR-194-5p	-0.256318	0.00830817	0.0400819	105	105
hsa-miR-195-3p	0.401567	2.17896e-05	0.000266048	105	105
hsa-miR-195-5p	0.266355	0.00602425	0.0315237	105	105
hsa-miR-196a-5p	-0.242753	0.0125907	0.0523506	105	105
hsa-miR-196b-3p	0.0186679	0.85008	0.917827	105	105
hsa-miR-196b-5p	-0.12297	0.211398	0.405966	105	105
hsa-miR-197-3p	0.14452	0.141319	0.309048	105	105
hsa-miR-197-5p	-0.0242576	0.805971	0.896632	105	95
hsa-miR-1976	0.0621859	0.528565	0.727052	105	101
hsa-miR-199a-3p	0.551762	1.05659e-09	5.40676e-08	105	105
hsa-miR-199a-5p	0.589094	3.8351e-11	3.44811e-09	105	105
hsa-miR-199b-3p	0.551352	1.09338e-09	5.40676e-08	105	105
hsa-miR-199b-5p	0.431859	4.22653e-06	6.43083e-05	105	105
hsa-miR-19a-3p	-0.162253	0.0981945	0.246483	105	102
hsa-miR-19b-1-5p	-0.206654	0.03442	0.11272	105	92
hsa-miR-19b-3p	-0.132	0.179502	0.360885	105	105
hsa-miR-200a-3p	-0.336233	0.000453534	0.00358836	105	105
hsa-miR-200a-5p	-0.416023	1.01605e-05	0.000145634	105	105
hsa-miR-200b-3p	-0.45029	1.43808e-06	2.45217e-05	105	105
hsa-miR-200b-5p	-0.34683	0.000289424	0.00238534	105	105
hsa-miR-200c-3p	-0.3391	0.000402265	0.00320839	105	105
hsa-miR-200c-5p	-0.200691	0.0400928	0.126683	105	105
hsa-miR-203a-3p	-0.232466	0.0170169	0.0662587	105	105
hsa-miR-203a-5p	-0.189011	0.0534774	0.156477	105	101
hsa-miR-203b-3p	-0.17745	0.0701471	0.18955	105	103
hsa-miR-203b-5p	-0.232186	0.0171541	0.066531	105	105
hsa-miR-204-5p	0.236097	0.0153213	0.0610998	105	105
hsa-miR-205-5p	-0.0274246	0.781238	0.890143	105	89
hsa-miR-20a-3p	-0.138605	0.158511	0.331433	105	99
hsa-miR-20a-5p	-0.362823	0.000142496	0.0013049	105	105
hsa-miR-20b-5p	0.10954	0.26598	0.476548	105	104
hsa-miR-21-3p	0.254922	0.00867984	0.0416477	105	105
hsa-miR-21-5p	0.134641	0.170879	0.348453	105	105
hsa-miR-210-3p	-0.106098	0.281386	0.49437	105	105
hsa-miR-210-5p	-0.14361	0.143868	0.311141	105	105
hsa-miR-211-5p	0.0233467	0.813121	0.900534	105	60
hsa-miR-2110	-0.0948495	0.335821	0.550791	105	105
hsa-miR-2114-3p	-0.0904081	0.359039	0.573616	105	60
hsa-miR-2114-5p	-0.115461	0.240842	0.445219	105	54
hsa-miR-2115-3p	0.184781	0.0591529	0.168594	105	87
hsa-miR-2116-3p	0.179892	0.0663141	0.18218	105	104
hsa-miR-2116-5p	0.0859944	0.383072	0.60041	105	92
hsa-miR-212-3p	0.144652	0.140953	0.309048	105	105
hsa-miR-212-5p	0.186298	0.0570623	0.165497	105	105
hsa-miR-214-3p	0.496117	7.37415e-08	2.43101e-06	105	105
hsa-miR-214-5p	0.669717	5.65459e-15	2.82082e-12	105	105
hsa-miR-215-3p	-0.10796	0.27298	0.484227	105	97
hsa-miR-215-5p	-0.210197	0.0313816	0.105566	105	105
hsa-miR-216a-3p	0.121635	0.216436	0.413235	105	78
hsa-miR-216a-5p	0.0584225	0.553855	0.745256	105	95
hsa-miR-216b-5p	0.25833	0.007797	0.0381744	105	69
hsa-miR-217	0.143992	0.142794	0.309946	105	74
hsa-miR-218-1-3p	0.458446	8.74395e-07	1.62941e-05	105	64
hsa-miR-218-5p	0.457788	9.10625e-07	1.63747e-05	105	105
hsa-miR-219a-1-3p	-0.150337	0.125827	0.285583	105	105
hsa-miR-219b-5p	-0.197628	0.0432983	0.133402	105	54
hsa-miR-22-3p	0.321131	0.000837323	0.0061313	105	105
hsa-miR-22-5p	0.390743	3.77117e-05	0.000414409	105	105
hsa-miR-221-3p	-0.068013	0.490583	0.698344	105	105
hsa-miR-221-5p	-0.0710492	0.471381	0.680578	105	105
hsa-miR-222-3p	-0.130811	0.183489	0.365133	105	105
hsa-miR-222-5p	-0.0109027	0.912104	0.95863	105	100
hsa-miR-223-3p	0.253049	0.00920158	0.0433351	105	105
hsa-miR-223-5p	0.215378	0.0273484	0.0957234	105	105
hsa-miR-224-3p	0.185273	0.0584681	0.167609	105	105
hsa-miR-224-5p	-0.0504216	0.609485	0.785514	105	105
hsa-miR-2276-3p	0.0195946	0.842731	0.916899	105	101
hsa-miR-2277-3p	-0.10587	0.282426	0.49437	105	100
hsa-miR-2277-5p	-0.070398	0.475465	0.68348	105	105
hsa-miR-2278	-0.0836794	0.396057	0.615881	105	61
hsa-miR-2355-3p	0.248598	0.0105533	0.0476586	105	101
hsa-miR-2355-5p	0.147368	0.133563	0.2988	105	95
hsa-miR-23a-3p	0.207945	0.0332853	0.110807	105	105
hsa-miR-23a-5p	-0.132656	0.177333	0.357923	105	105
hsa-miR-23b-3p	0.379821	6.43523e-05	0.000642873	105	105
hsa-miR-23b-5p	0.0452204	0.64691	0.812953	105	100
hsa-miR-23c	0.117258	0.23355	0.435813	105	101
hsa-miR-24-1-5p	0.2518	0.0095646	0.0446198	105	102
hsa-miR-24-2-5p	0.0822097	0.404435	0.624003	105	105
hsa-miR-24-3p	0.0960053	0.329938	0.546582	105	105
hsa-miR-2467-5p	-0.203825	0.0370208	0.119262	105	101
hsa-miR-25-3p	-0.149423	0.128169	0.290067	105	105
hsa-miR-25-5p	-0.145282	0.139211	0.307322	105	105
hsa-miR-26a-1-3p	-0.206298	0.0347385	0.113212	105	103
hsa-miR-26a-2-3p	0.0552998	0.575275	0.76248	105	103
hsa-miR-26a-5p	0.391405	3.64868e-05	0.000409823	105	105
hsa-miR-26b-3p	0.113607	0.24853	0.454337	105	105
hsa-miR-26b-5p	-0.0681058	0.48999	0.698344	105	105
hsa-miR-27a-3p	0.327386	0.000652005	0.00503776	105	105
hsa-miR-27a-5p	-0.150515	0.125373	0.285583	105	105
hsa-miR-27b-3p	0.24399	0.0121329	0.0517191	105	105
hsa-miR-27b-5p	0.273699	0.00472556	0.0257014	105	105
hsa-miR-28-3p	0.274591	0.00458627	0.0253398	105	105
hsa-miR-28-5p	0.287567	0.00293463	0.0176972	105	105
hsa-miR-296-3p	0.175941	0.0726039	0.194068	105	104
hsa-miR-296-5p	0.279962	0.00382201	0.0219766	105	105
hsa-miR-299-3p	0.343019	0.000340779	0.00274009	105	104
hsa-miR-299-5p	0.503426	4.40559e-08	1.55612e-06	105	104
hsa-miR-29a-3p	-0.05977	0.544733	0.740688	105	105
hsa-miR-29a-5p	-0.0975433	0.322213	0.540117	105	104
hsa-miR-29b-1-5p	-0.238633	0.0142255	0.0574247	105	105
hsa-miR-29b-2-5p	0.244027	0.0121195	0.0517191	105	105
hsa-miR-29b-3p	0.0293031	0.766667	0.886881	105	105
hsa-miR-29c-3p	0.244927	0.0117958	0.0517191	105	105
hsa-miR-29c-5p	0.20623	0.0348003	0.113212	105	105
hsa-miR-301a-3p	-0.102423	0.298479	0.513384	105	104
hsa-miR-301a-5p	-0.0741779	0.452029	0.665078	105	94
hsa-miR-301b-3p	-0.0913307	0.354136	0.567747	105	104
hsa-miR-3064-5p	0.0444205	0.652748	0.815424	105	83
hsa-miR-3065-3p	0.227443	0.0196289	0.074573	105	105
hsa-miR-3065-5p	0.277608	0.00414165	0.0233223	105	105
hsa-miR-3074-3p	0.241439	0.0130934	0.0530714	105	103
hsa-miR-3074-5p	0.13561	0.16779	0.344999	105	105
hsa-miR-30a-3p	0.4146	1.09706e-05	0.000154998	105	105
hsa-miR-30a-5p	0.384619	5.10049e-05	0.000525457	105	105
hsa-miR-30b-3p	-0.112325	0.253943	0.460825	105	105
hsa-miR-30b-5p	-0.124082	0.207267	0.401903	105	105
hsa-miR-30c-1-3p	0.0692562	0.482671	0.690827	105	105
hsa-miR-30c-2-3p	0.493303	8.96325e-08	2.7702e-06	105	105
hsa-miR-30c-5p	-0.0666296	0.499467	0.701666	105	105
hsa-miR-30d-3p	-0.143421	0.144402	0.311141	105	105
hsa-miR-30d-5p	-0.156228	0.111501	0.267657	105	105
hsa-miR-30e-3p	-0.00327331	0.973563	0.985529	105	105
hsa-miR-30e-5p	-0.103211	0.294758	0.509644	105	105
hsa-miR-31-3p	0.0147089	0.881613	0.938552	105	91
hsa-miR-31-5p	0.131153	0.182336	0.365041	105	105
hsa-miR-3115	-0.0103624	0.916443	0.96013	105	61
hsa-miR-3116	-0.384832	5.04787e-05	0.000525457	105	101
hsa-miR-3117-3p	0.2536	0.00904532	0.0430087	105	104
hsa-miR-3120-3p	0.669647	5.70438e-15	2.82082e-12	105	105
hsa-miR-3120-5p	0.514238	2.01032e-08	7.36374e-07	105	105
hsa-miR-3126-5p	0.429467	4.83919e-06	7.25146e-05	105	83
hsa-miR-3127-3p	-0.158723	0.105828	0.260345	105	92
hsa-miR-3127-5p	-0.0708456	0.472656	0.681424	105	105
hsa-miR-3129-3p	0.435753	3.38326e-06	5.31118e-05	105	97
hsa-miR-3129-5p	0.327177	0.000657525	0.00504102	105	60
hsa-miR-3130-3p	-0.252648	0.00931671	0.0436693	105	104
hsa-miR-3130-5p	-0.25635	0.00829979	0.0400819	105	104
hsa-miR-3131	-0.217838	0.0255931	0.090665	105	91
hsa-miR-3133	-0.197758	0.0431584	0.133387	105	93
hsa-miR-3136-5p	-0.0547437	0.579129	0.76408	105	87
hsa-miR-3138	0.163521	0.0955591	0.240478	105	67
hsa-miR-3140-3p	-0.0542807	0.582347	0.765879	105	80
hsa-miR-3145-3p	-0.00467139	0.962278	0.983154	105	58
hsa-miR-3150a-5p	0.0217246	0.825893	0.907399	105	100
hsa-miR-3150b-3p	0.0278669	0.777799	0.889931	105	100
hsa-miR-3152-5p	-0.02299	0.815926	0.900615	105	76
hsa-miR-3154	0.0664268	0.500777	0.702508	105	66
hsa-miR-3155a	-0.154162	0.116374	0.273417	105	59
hsa-miR-3155b	0.0903035	0.359597	0.573616	105	80
hsa-miR-3157-3p	-0.1078	0.273693	0.484227	105	99
hsa-miR-3157-5p	-0.13646	0.165119	0.340924	105	99
hsa-miR-3158-3p	-0.105882	0.282373	0.49437	105	105
hsa-miR-3158-5p	-0.0782799	0.427343	0.642733	105	105
hsa-miR-3159	0.0259105	0.793036	0.895566	105	79
hsa-miR-3173-3p	0.0399276	0.685918	0.838533	105	56
hsa-miR-3173-5p	-0.0876928	0.373711	0.590416	105	99
hsa-miR-3174	0.0223126	0.821258	0.904481	105	95
hsa-miR-3176	-0.0356983	0.717699	0.858436	105	102
hsa-miR-3177-3p	-0.119736	0.223746	0.4223	105	103
hsa-miR-3177-5p	-0.0668475	0.498062	0.701276	105	67
hsa-miR-3180-3p	0.0679873	0.490747	0.698344	105	85
hsa-miR-3180-5p	0.0335805	0.7338	0.867059	105	70
hsa-miR-3184-3p	0.0385189	0.696447	0.846174	105	105
hsa-miR-3184-5p	-0.0440739	0.655283	0.815658	105	105
hsa-miR-3187-3p	0.0472353	0.632301	0.80426	105	67
hsa-miR-3188	0.0421588	0.669366	0.826935	105	78
hsa-miR-3189-3p	-0.201158	0.0396227	0.125599	105	60
hsa-miR-3193	0.0995834	0.312147	0.527716	105	70
hsa-miR-3194-5p	-0.122209	0.214259	0.409869	105	90
hsa-miR-3199	0.0915182	0.353144	0.567747	105	56
hsa-miR-32-3p	-0.3976	2.6701e-05	0.000310674	105	105
hsa-miR-32-5p	0.0978347	0.320763	0.538599	105	103
hsa-miR-3200-3p	-0.154761	0.114942	0.272029	105	105
hsa-miR-3200-5p	-0.183187	0.0614148	0.172555	105	85
hsa-miR-320a	0.0753994	0.444596	0.657259	105	105
hsa-miR-320b	0.156	0.11203	0.267857	105	105
hsa-miR-320c	0.0479939	0.626836	0.800957	105	105
hsa-miR-320d	0.0640965	0.51595	0.718972	105	105
hsa-miR-320e	0.173284	0.0770989	0.202419	105	79
hsa-miR-323a-3p	0.522283	1.10141e-08	4.95133e-07	105	105
hsa-miR-323b-3p	0.249292	0.0103315	0.047087	105	105
hsa-miR-324-3p	0.136575	0.164757	0.340889	105	105
hsa-miR-324-5p	0.0837266	0.39579	0.615881	105	105
hsa-miR-326	0.242562	0.0126627	0.0523506	105	105
hsa-miR-328-3p	0.389869	3.9386e-05	0.000428052	105	105
hsa-miR-329-3p	0.562947	4.08432e-10	2.37611e-08	105	103
hsa-miR-330-3p	-0.056531	0.566784	0.756482	105	105
hsa-miR-330-5p	0.0622201	0.528338	0.727052	105	105
hsa-miR-331-3p	0.16765	0.0873663	0.222694	105	105
hsa-miR-331-5p	0.190319	0.0518156	0.15343	105	105
hsa-miR-335-3p	-0.0960286	0.32982	0.546582	105	105
hsa-miR-335-5p	-0.112722	0.252256	0.460258	105	104
hsa-miR-337-3p	0.406868	1.65401e-05	0.000218109	105	104
hsa-miR-337-5p	0.374321	8.36335e-05	0.000818946	105	100
hsa-miR-338-3p	0.277546	0.00415038	0.0233223	105	105
hsa-miR-338-5p	0.270618	0.00523643	0.0282996	105	105
hsa-miR-339-3p	-0.004975	0.959829	0.982274	105	105
hsa-miR-339-5p	-0.125722	0.201276	0.392627	105	105
hsa-miR-33a-3p	-0.0194496	0.843881	0.91709	105	96
hsa-miR-33a-5p	-0.269312	0.00546743	0.0290298	105	98
hsa-miR-33b-3p	-0.0817684	0.40697	0.62499	105	102
hsa-miR-33b-5p	-0.117354	0.233161	0.435813	105	105
hsa-miR-340-3p	0.0771413	0.434116	0.648552	105	105
hsa-miR-340-5p	0.0258286	0.793676	0.895566	105	105
hsa-miR-342-3p	0.323429	0.00076427	0.00564077	105	105
hsa-miR-342-5p	0.269267	0.00547562	0.0290298	105	104
hsa-miR-345-5p	-0.161661	0.099444	0.248676	105	105
hsa-miR-346	0.0570356	0.563321	0.75466	105	92
hsa-miR-34a-3p	0.106073	0.281498	0.49437	105	99
hsa-miR-34a-5p	0.00146299	0.988182	0.993122	105	105
hsa-miR-34b-3p	0.375022	8.09072e-05	0.000800172	105	102
hsa-miR-34b-5p	0.459044	8.4264e-07	1.62075e-05	105	96
hsa-miR-34c-3p	0.51855	1.45899e-08	6.01227e-07	105	98
hsa-miR-34c-5p	0.576584	1.22073e-10	8.16595e-09	105	105
hsa-miR-3529-3p	-0.312496	0.00117254	0.0081665	105	105
hsa-miR-3591-3p	-0.0789699	0.423267	0.640078	105	69
hsa-miR-3605-3p	0.153577	0.117783	0.275244	105	105
hsa-miR-3605-5p	0.142504	0.147012	0.314364	105	105
hsa-miR-3607-3p	0.00430413	0.965242	0.983508	105	104
hsa-miR-3609	0.097118	0.324338	0.540497	105	101
hsa-miR-361-3p	0.181947	0.0632222	0.174656	105	105
hsa-miR-361-5p	-0.0159306	0.87186	0.931427	105	105
hsa-miR-3610	-0.113876	0.247403	0.453114	105	67
hsa-miR-3613-3p	-0.0800198	0.41711	0.633673	105	102
hsa-miR-3613-5p	0.00779178	0.937122	0.970486	105	93
hsa-miR-3614-3p	0.175611	0.0731513	0.194553	105	67
hsa-miR-3614-5p	0.0602372	0.541588	0.737783	105	105
hsa-miR-3615	-0.0357798	0.717082	0.858436	105	105
hsa-miR-3617-5p	0.0860751	0.382624	0.60041	105	83
hsa-miR-3619-5p	-0.142385	0.147354	0.314364	105	75
hsa-miR-362-5p	-0.31064	0.00125888	0.00870654	105	105
hsa-miR-3620-3p	-0.0512686	0.603482	0.784288	105	101
hsa-miR-3620-5p	0.0971655	0.3241	0.540497	105	60
hsa-miR-3622a-3p	0.359249	0.00016749	0.00149232	105	63
hsa-miR-3622a-5p	0.403937	1.92744e-05	0.000241296	105	79
hsa-miR-3622b-3p	0.403937	1.92744e-05	0.000241296	105	79
hsa-miR-363-3p	0.309338	0.00132287	0.00908553	105	105
hsa-miR-3648	-0.00490121	0.960424	0.982274	105	81
hsa-miR-3651	-0.104822	0.287247	0.501036	105	105
hsa-miR-3652	-0.135866	0.166982	0.344052	105	78
hsa-miR-3653-3p	0.170976	0.0811803	0.211282	105	102
hsa-miR-3656	0.0724139	0.462886	0.672879	105	98
hsa-miR-365a-3p	0.315204	0.00105617	0.0074611	105	105
hsa-miR-365a-5p	0.357433	0.000181691	0.0016044	105	100
hsa-miR-365b-3p	0.315204	0.00105617	0.0074611	105	105
hsa-miR-365b-5p	0.209651	0.0318348	0.106727	105	97
hsa-miR-3661	-0.00860992	0.930536	0.967718	105	95
hsa-miR-3664-3p	-0.161247	0.100325	0.248676	105	90
hsa-miR-3667-3p	0.29539	0.00221943	0.0141063	105	54
hsa-miR-3677-3p	-0.165962	0.0906446	0.229865	105	100
hsa-miR-3679-5p	-0.114007	0.246856	0.453114	105	104
hsa-miR-3684	-0.110643	0.261169	0.470484	105	64
hsa-miR-3687	-0.0957611	0.331176	0.547714	105	105
hsa-miR-3688-3p	-0.134786	0.170413	0.348219	105	86
hsa-miR-3688-5p	-0.122661	0.212554	0.407395	105	83
hsa-miR-369-3p	0.229166	0.0186964	0.0713928	105	102
hsa-miR-369-5p	0.407377	1.61038e-05	0.000215226	105	105
hsa-miR-3690	0.0292967	0.766717	0.886881	105	102
hsa-miR-3691-5p	-0.0250018	0.800141	0.896194	105	96
hsa-miR-370-3p	0.484786	1.60104e-07	4.52408e-06	105	105
hsa-miR-370-5p	0.486558	1.42087e-07	4.13305e-06	105	88
hsa-miR-371a-3p	0.287978	0.00289241	0.0175497	105	102
hsa-miR-371a-5p	0.237078	0.0148891	0.0596166	105	73
hsa-miR-371b-3p	0.23334	0.0165943	0.0648688	105	73
hsa-miR-371b-5p	0.286119	0.00308765	0.0184209	105	102
hsa-miR-373-3p	0.359255	0.000167444	0.00149232	105	62
hsa-miR-374a-3p	0.0515263	0.60166	0.783381	105	100
hsa-miR-374a-5p	0.0382053	0.698798	0.846846	105	104
hsa-miR-374b-3p	-0.0494741	0.616232	0.791077	105	103
hsa-miR-374b-5p	0.0617635	0.531374	0.72881	105	105
hsa-miR-374c-3p	0.0617635	0.531374	0.72881	105	105
hsa-miR-374c-5p	0.0345146	0.726684	0.86461	105	85
hsa-miR-375	-0.302192	0.00172987	0.0114821	105	105
hsa-miR-376a-3p	0.22205	0.02281	0.0827253	105	88
hsa-miR-376a-5p	0.346397	0.000294874	0.00241017	105	104
hsa-miR-376c-3p	0.242453	0.0127039	0.0523506	105	100
hsa-miR-377-3p	0.0638928	0.517288	0.719547	105	82
hsa-miR-377-5p	0.600649	1.25844e-11	1.55024e-09	105	105
hsa-miR-378a-3p	-0.110725	0.260813	0.470484	105	105
hsa-miR-378a-5p	-0.00685506	0.944669	0.975237	105	105
hsa-miR-378b	-0.0196045	0.842653	0.916899	105	67
hsa-miR-378c	-0.0759268	0.441409	0.656779	105	105
hsa-miR-378d	-0.00498797	0.959724	0.982274	105	105
hsa-miR-378e	0.140858	0.151787	0.321451	105	99
hsa-miR-378f	-0.135149	0.169255	0.346569	105	94
hsa-miR-378g	-0.0340817	0.729979	0.86461	105	105
hsa-miR-378h	0.0313262	0.751067	0.876983	105	64
hsa-miR-378i	-0.184826	0.059089	0.168594	105	105
hsa-miR-379-3p	0.383152	5.47844e-05	0.000552875	105	105
hsa-miR-379-5p	0.154749	0.114973	0.272029	105	105
hsa-miR-380-3p	0.298652	0.0019709	0.01274	105	81
hsa-miR-381-3p	0.468795	4.5641e-07	1.02624e-05	105	105
hsa-miR-381-5p	0.279976	0.00382016	0.0219766	105	58
hsa-miR-382-3p	0.325951	0.000690848	0.00521564	105	99
hsa-miR-382-5p	0.459638	8.12206e-07	1.60654e-05	105	105
hsa-miR-383-5p	0.185769	0.0577838	0.166128	105	88
hsa-miR-3909	0.241921	0.0129069	0.0527356	105	105
hsa-miR-3912-3p	0.0543425	0.581917	0.765879	105	81
hsa-miR-3913-3p	0.0588889	0.55069	0.745051	105	103
hsa-miR-3913-5p	0.0588889	0.55069	0.745051	105	103
hsa-miR-3916	-0.0514794	0.601992	0.783381	105	95
hsa-miR-3917	-0.0285084	0.772822	0.889931	105	81
hsa-miR-3918	-0.0596982	0.545218	0.740688	105	63
hsa-miR-3928-3p	0.176615	0.0714984	0.192048	105	104
hsa-miR-3934-5p	-0.121378	0.217416	0.414306	105	105
hsa-miR-3937	0.141299	0.150497	0.320089	105	66
hsa-miR-3939	-0.107834	0.273545	0.484227	105	85
hsa-miR-3940-3p	-0.0281979	0.77523	0.889931	105	103
hsa-miR-3943	0.294766	0.0022701	0.0142097	105	96
hsa-miR-3944-3p	-0.224931	0.0210596	0.0787278	105	68
hsa-miR-409-3p	0.539224	2.94371e-09	1.38635e-07	105	105
hsa-miR-409-5p	0.403959	1.92517e-05	0.000241296	105	95
hsa-miR-410-3p	0.454197	1.13493e-06	2.00437e-05	105	105
hsa-miR-411-3p	0.353	0.000221171	0.00191876	105	103
hsa-miR-411-5p	0.366646	0.000119623	0.00110568	105	105
hsa-miR-412-5p	0.147312	0.133713	0.2988	105	85
hsa-miR-421	-0.0382766	0.698264	0.846846	105	105
hsa-miR-422a	-0.0285211	0.772724	0.889931	105	103
hsa-miR-423-3p	-0.0539636	0.584556	0.766745	105	105
hsa-miR-423-5p	0.0385189	0.696447	0.846174	105	105
hsa-miR-424-3p	0.277747	0.00412217	0.0233223	105	105
hsa-miR-424-5p	0.225029	0.0210021	0.0787278	105	105
hsa-miR-425-3p	-0.166864	0.0888812	0.225973	105	105
hsa-miR-425-5p	-0.332565	0.000527875	0.0041434	105	105
hsa-miR-4286	0.0329896	0.738314	0.867211	105	101
hsa-miR-429	-0.184645	0.059342	0.168647	105	105
hsa-miR-431-3p	0.467165	5.06347e-07	1.08865e-05	105	105
hsa-miR-431-5p	0.412086	1.25513e-05	0.000170045	105	105
hsa-miR-432-5p	0.476188	2.83061e-07	6.78562e-06	105	105
hsa-miR-4326	0.10962	0.265628	0.476548	105	95
hsa-miR-433-3p	0.475915	2.88166e-07	6.78562e-06	105	105
hsa-miR-433-5p	0.279458	0.00388849	0.0222296	105	71
hsa-miR-4421	0.0230062	0.815798	0.900615	105	74
hsa-miR-4435	0.137751	0.161117	0.334758	105	103
hsa-miR-4442	-0.173056	0.077494	0.202755	105	79
hsa-miR-4443	0.0725024	0.462337	0.672879	105	102
hsa-miR-4446-3p	-0.0951415	0.334328	0.550268	105	102
hsa-miR-4449	0.066847	0.498065	0.701276	105	82
hsa-miR-4461	-0.0552083	0.575908	0.76248	105	86
hsa-miR-4473	-0.22199	0.0228481	0.0827253	105	102
hsa-miR-4474-3p	-0.115724	0.239763	0.444055	105	92
hsa-miR-4479	0.033257	0.73627	0.867211	105	79
hsa-miR-4484	-0.124731	0.204879	0.398086	105	55
hsa-miR-4485-3p	-0.0469164	0.634604	0.80426	105	103
hsa-miR-4488	-0.0245954	0.803323	0.896632	105	75
hsa-miR-4492	-0.042079	0.669956	0.826935	105	101
hsa-miR-449a	-0.0293711	0.766141	0.886881	105	103
hsa-miR-449b-5p	0.0581998	0.55537	0.746279	105	79
hsa-miR-449c-5p	0.0535409	0.587506	0.769182	105	103
hsa-miR-4508	-0.0929895	0.345426	0.560963	105	80
hsa-miR-450a-2-3p	0.280612	0.00373768	0.0217445	105	76
hsa-miR-450a-5p	0.235155	0.0157464	0.0622469	105	104
hsa-miR-450b-5p	0.17652	0.0716538	0.192048	105	104
hsa-miR-4510	0.178651	0.0682405	0.185923	105	92
hsa-miR-4511	0.077805	0.430161	0.643614	105	71
hsa-miR-4512	0.0470322	0.633767	0.80426	105	69
hsa-miR-4516	-0.031095	0.752844	0.878022	105	98
hsa-miR-4517	-0.0440225	0.65566	0.815658	105	71
hsa-miR-4519	-0.0940816	0.339765	0.555418	105	97
hsa-miR-451a	-0.0321975	0.744378	0.87123	105	105
hsa-miR-452-5p	0.0403768	0.682574	0.835478	105	105
hsa-miR-4524a-3p	0.295143	0.00223932	0.0141063	105	73
hsa-miR-4524b-5p	0.295143	0.00223932	0.0141063	105	73
hsa-miR-4526	-0.157366	0.108884	0.263292	105	61
hsa-miR-4532	0.0120244	0.903103	0.950599	105	62
hsa-miR-454-3p	-0.207709	0.0334908	0.110807	105	105
hsa-miR-454-5p	-0.0240091	0.80792	0.89779	105	105
hsa-miR-455-3p	0.264811	0.00633466	0.0326269	105	105
hsa-miR-455-5p	0.161252	0.100314	0.248676	105	105
hsa-miR-4632-3p	0.0316573	0.748522	0.875046	105	58
hsa-miR-4636	-0.0920295	0.35045	0.566332	105	100
hsa-miR-4638-3p	0.212119	0.0298304	0.101732	105	95
hsa-miR-4640-3p	-0.0386545	0.695431	0.846174	105	94
hsa-miR-4645-3p	0.092862	0.34609	0.56112	105	104
hsa-miR-4646-3p	-0.0719484	0.465774	0.675441	105	70
hsa-miR-4647	0.0751356	0.446196	0.658638	105	65
hsa-miR-4649-3p	0.383645	5.34871e-05	0.000545348	105	89
hsa-miR-4652-5p	-0.00551353	0.955484	0.982274	105	57
hsa-miR-4659a-3p	-0.0854676	0.386004	0.602142	105	59
hsa-miR-4659b-5p	-0.120521	0.220705	0.418239	105	56
hsa-miR-4661-3p	-0.0622645	0.528043	0.727052	105	56
hsa-miR-4661-5p	-0.0887362	0.368031	0.584242	105	104
hsa-miR-4662a-5p	-0.0803515	0.415175	0.633673	105	101
hsa-miR-4662b	-0.0792308	0.421732	0.639713	105	101
hsa-miR-4664-3p	-0.0457621	0.642969	0.811092	105	102
hsa-miR-4667-5p	0.0133235	0.892693	0.948307	105	81
hsa-miR-4670-3p	0.260168	0.00735476	0.0367367	105	58
hsa-miR-4670-5p	0.243344	0.0123699	0.0518383	105	57
hsa-miR-4676-3p	-0.0371863	0.70646	0.8531	105	74
hsa-miR-4677-3p	-0.0818892	0.406276	0.624894	105	105
hsa-miR-4677-5p	0.045237	0.64679	0.812953	105	66
hsa-miR-4685-3p	0.182873	0.061868	0.173336	105	102
hsa-miR-4687-5p	0.210542	0.0310985	0.10533	105	92
hsa-miR-4688	0.0159012	0.872094	0.931427	105	75
hsa-miR-4697-3p	-0.114179	0.246138	0.453114	105	96
hsa-miR-4707-3p	-0.130824	0.183445	0.365133	105	75
hsa-miR-4708-3p	-0.096817	0.325847	0.541618	105	91
hsa-miR-4708-5p	-0.153413	0.118178	0.275244	105	57
hsa-miR-4709-5p	0.370713	9.90673e-05	0.00093312	105	73
hsa-miR-4712-3p	-0.00929919	0.92499	0.963978	105	58
hsa-miR-4713-5p	-0.152099	0.1214	0.278571	105	98
hsa-miR-4717-3p	-0.212244	0.0297316	0.101732	105	56
hsa-miR-4717-5p	-0.173248	0.0771606	0.202419	105	61
hsa-miR-4724-5p	0.0472511	0.632187	0.80426	105	71
hsa-miR-4726-5p	-0.221878	0.0229188	0.0827253	105	65
hsa-miR-4728-3p	-0.0623928	0.527192	0.727052	105	104
hsa-miR-4728-5p	-0.143139	0.145202	0.312184	105	65
hsa-miR-4731-3p	0.0827223	0.401501	0.62239	105	55
hsa-miR-4732-3p	-0.0282207	0.775053	0.889931	105	94
hsa-miR-4733-5p	-0.0784847	0.426131	0.642733	105	63
hsa-miR-4736	0.0267004	0.786875	0.892454	105	56
hsa-miR-4738-3p	0.140052	0.15417	0.325799	105	72
hsa-miR-4741	-0.0237617	0.809862	0.898937	105	77
hsa-miR-4742-3p	0.0100969	0.918577	0.961346	105	98
hsa-miR-4745-5p	-0.0263062	0.789949	0.894913	105	69
hsa-miR-4746-5p	-0.219826	0.0242454	0.0862542	105	105
hsa-miR-4750-5p	-0.0207135	0.833877	0.911276	105	59
hsa-miR-4755-3p	-0.138096	0.16006	0.333262	105	88
hsa-miR-4755-5p	-0.108485	0.270642	0.482279	105	74
hsa-miR-4757-3p	0.219984	0.0241408	0.0861922	105	73
hsa-miR-4758-3p	0.185973	0.0575058	0.166128	105	75
hsa-miR-4762-5p	-0.0331321	0.737224	0.867211	105	72
hsa-miR-4767	0.0365713	0.711097	0.855111	105	101
hsa-miR-4768-5p	0.168444	0.0858558	0.219978	105	90
hsa-miR-4772-3p	0.0491607	0.618471	0.792316	105	60
hsa-miR-4772-5p	0.120081	0.222408	0.420576	105	79
hsa-miR-4773	0.300397	0.00184852	0.0120275	105	72
hsa-miR-4775	-0.0250439	0.799812	0.896194	105	100
hsa-miR-4780	0.00801873	0.935295	0.970486	105	62
hsa-miR-4781-3p	0.109082	0.267997	0.478429	105	102
hsa-miR-4785	0.19815	0.042737	0.132498	105	73
hsa-miR-4786-5p	-0.0759181	0.441461	0.656779	105	83
hsa-miR-4787-3p	-0.0409915	0.678007	0.833722	105	88
hsa-miR-4797-3p	-0.080065	0.416845	0.633673	105	55
hsa-miR-4800-3p	0.0740886	0.452576	0.665078	105	60
hsa-miR-4802-3p	0.0305103	0.757346	0.880385	105	61
hsa-miR-4804-5p	0.093831	0.341059	0.556613	105	77
hsa-miR-483-3p	0.202423	0.0383705	0.12281	105	103
hsa-miR-483-5p	0.207699	0.0334997	0.110807	105	104
hsa-miR-484	0.0341612	0.729374	0.86461	105	105
hsa-miR-485-3p	0.403959	1.92518e-05	0.000241296	105	105
hsa-miR-485-5p	0.514856	1.92064e-08	7.36374e-07	105	104
hsa-miR-486-3p	-0.0729038	0.459856	0.672542	105	105
hsa-miR-486-5p	-0.0711196	0.470941	0.680578	105	105
hsa-miR-487a-3p	0.458863	8.52165e-07	1.62075e-05	105	104
hsa-miR-487a-5p	0.352702	0.000224088	0.00192716	105	96
hsa-miR-487b-3p	0.486803	1.39751e-07	4.13305e-06	105	105
hsa-miR-487b-5p	0.217057	0.0261394	0.0919995	105	58
hsa-miR-489-3p	-0.156526	0.11081	0.266806	105	102
hsa-miR-490-3p	0.367443	0.000115306	0.00107583	105	89
hsa-miR-490-5p	0.372806	8.98209e-05	0.000867547	105	74
hsa-miR-491-3p	-0.106404	0.279993	0.493606	105	57
hsa-miR-491-5p	0.0154648	0.875576	0.934137	105	104
hsa-miR-493-3p	0.595747	2.02988e-11	2.00755e-09	105	105
hsa-miR-493-5p	0.451176	1.36326e-06	2.36538e-05	105	105
hsa-miR-494-3p	0.28513	0.00319639	0.0188169	105	102
hsa-miR-495-3p	0.245098	0.0117354	0.0517191	105	105
hsa-miR-496	0.292365	0.0024748	0.0152023	105	95
hsa-miR-497-5p	0.35228	0.000228288	0.00194636	105	105
hsa-miR-4999-5p	-0.00134872	0.989105	0.993122	105	91
hsa-miR-499a-5p	0.00142069	0.988524	0.993122	105	95
hsa-miR-499b-3p	0.00714123	0.942363	0.974116	105	94
hsa-miR-5000-3p	0.00783779	0.936752	0.970486	105	92
hsa-miR-5001-3p	-0.0394383	0.689569	0.841955	105	104
hsa-miR-5001-5p	0.0060426	0.951218	0.980974	105	68
hsa-miR-5002-5p	0.235435	0.015619	0.0620369	105	82
hsa-miR-5006-3p	0.0658525	0.504494	0.706721	105	86
hsa-miR-5008-3p	0.153071	0.119011	0.276296	105	64
hsa-miR-5009-5p	0.0449346	0.648993	0.814161	105	63
hsa-miR-500a-3p	-0.220393	0.0238726	0.0855434	105	105
hsa-miR-500a-5p	-0.274419	0.00461287	0.0253452	105	105
hsa-miR-500b-5p	-0.0330665	0.737726	0.867211	105	68
hsa-miR-501-3p	0.0215303	0.827426	0.907399	105	105
hsa-miR-501-5p	-0.0781231	0.428272	0.642733	105	105
hsa-miR-5010-3p	0.0123578	0.90043	0.950599	105	105
hsa-miR-5010-5p	0.00930962	0.924906	0.963978	105	67
hsa-miR-502-3p	-0.126848	0.197238	0.386275	105	105
hsa-miR-502-5p	-0.212714	0.0293631	0.100834	105	104
hsa-miR-503-3p	0.18237	0.0626008	0.173911	105	68
hsa-miR-503-5p	0.103293	0.294374	0.509644	105	104
hsa-miR-504-5p	0.303387	0.00165478	0.011058	105	104
hsa-miR-505-3p	0.0668628	0.497964	0.701276	105	105
hsa-miR-505-5p	-0.142624	0.14667	0.314364	105	105
hsa-miR-508-3p	-0.0258992	0.793125	0.895566	105	87
hsa-miR-508-5p	0.0245041	0.804039	0.896632	105	59
hsa-miR-509-3p	0.0127145	0.897571	0.950599	105	102
hsa-miR-5090	0.0392699	0.690827	0.842451	105	60
hsa-miR-5091	-0.0881316	0.371316	0.588512	105	99
hsa-miR-5092	-0.261112	0.00713636	0.0358267	105	97
hsa-miR-5094	0.0448628	0.649518	0.814161	105	54
hsa-miR-5100	-0.0467334	0.635927	0.80426	105	102
hsa-miR-511-3p	0.139642	0.155391	0.327679	105	60
hsa-miR-511-5p	0.372397	9.15633e-05	0.000870731	105	105
hsa-miR-512-3p	0.0950834	0.334625	0.550268	105	87
hsa-miR-513c-5p	0.00454747	0.963278	0.98316	105	65
hsa-miR-516b-5p	0.0739733	0.453281	0.665126	105	77
hsa-miR-517a-3p	0.157637	0.108269	0.263091	105	55
hsa-miR-517b-3p	0.157637	0.108269	0.263091	105	55
hsa-miR-5189-5p	0.00539497	0.956441	0.982274	105	64
hsa-miR-518b	0.0806147	0.413644	0.633272	105	84
hsa-miR-5193	0.101617	0.302322	0.517294	105	75
hsa-miR-532-3p	-0.107806	0.273667	0.484227	105	105
hsa-miR-532-5p	-0.205122	0.0358089	0.115735	105	105
hsa-miR-539-3p	0.11672	0.235717	0.438203	105	83
hsa-miR-539-5p	0.284575	0.00325883	0.0190709	105	100
hsa-miR-541-5p	0.190918	0.0510702	0.151677	105	76
hsa-miR-542-3p	0.0331942	0.73675	0.867211	105	94
hsa-miR-542-5p	0.348036	0.000274716	0.00228314	105	104
hsa-miR-543	0.244066	0.0121054	0.0517191	105	105
hsa-miR-548ab	0.0730043	0.459237	0.672542	105	58
hsa-miR-548al	0.194081	0.0472734	0.144747	105	100
hsa-miR-548ar-3p	0.0169204	0.863973	0.92817	105	59
hsa-miR-548at-5p	0.0580836	0.556162	0.746328	105	101
hsa-miR-548ay-3p	-0.170618	0.0818296	0.212413	105	57
hsa-miR-548az-5p	-0.200528	0.0402589	0.126803	105	81
hsa-miR-548ba	0.289971	0.00269543	0.0164554	105	69
hsa-miR-548d-3p	-0.104188	0.290187	0.504385	105	73
hsa-miR-548e-3p	0.0441137	0.654992	0.815658	105	100
hsa-miR-548e-5p	-0.0553385	0.575007	0.76248	105	90
hsa-miR-548i	-0.129644	0.187461	0.369321	105	91
hsa-miR-548j-5p	-0.0452271	0.646862	0.812953	105	97
hsa-miR-548k	-0.176538	0.0716235	0.192048	105	105
hsa-miR-548l	0.00411717	0.966751	0.983508	105	97
hsa-miR-548n	-0.160797	0.101289	0.249811	105	64
hsa-miR-548o-3p	-0.153661	0.117579	0.275244	105	105
hsa-miR-548q	0.273673	0.00472968	0.0257014	105	101
hsa-miR-548s	-0.154385	0.11584	0.273417	105	101
hsa-miR-549a	-0.155798	0.1125	0.268102	105	104
hsa-miR-550a-3-5p	-0.0267396	0.786569	0.892454	105	99
hsa-miR-550a-3p	-0.178123	0.0690732	0.187674	105	105
hsa-miR-550a-5p	-0.10938	0.266684	0.476945	105	105
hsa-miR-550b-2-5p	-0.180386	0.0655599	0.180609	105	105
hsa-miR-550b-3p	0.0161064	0.870458	0.931427	105	105
hsa-miR-551a	0.191022	0.0509414	0.151677	105	68
hsa-miR-551b-3p	0.192417	0.0492401	0.148471	105	78
hsa-miR-552-3p	-0.0308626	0.754633	0.879072	105	102
hsa-miR-552-5p	-0.0251167	0.799241	0.896194	105	104
hsa-miR-556-3p	0.0913193	0.354196	0.567747	105	76
hsa-miR-556-5p	-0.0130746	0.894687	0.949405	105	88
hsa-miR-5581-3p	0.0564191	0.567553	0.756482	105	93
hsa-miR-5588-3p	-0.187109	0.0559704	0.162808	105	55
hsa-miR-5588-5p	-0.0487487	0.621419	0.795063	105	91
hsa-miR-561-5p	0.0819321	0.406028	0.624894	105	84
hsa-miR-5680	0.116838	0.235237	0.438135	105	63
hsa-miR-5690	0.0704402	0.475199	0.68348	105	105
hsa-miR-5696	-0.151502	0.122886	0.281328	105	60
hsa-miR-5699-3p	-0.0445946	0.651475	0.815424	105	95
hsa-miR-5699-5p	0.0631017	0.522499	0.724556	105	102
hsa-miR-5701	0.0595194	0.546424	0.741308	105	105
hsa-miR-574-3p	0.438192	2.93888e-06	4.76485e-05	105	105
hsa-miR-574-5p	0.00711208	0.942597	0.974116	105	105
hsa-miR-576-3p	-0.147264	0.133841	0.2988	105	100
hsa-miR-576-5p	-0.0465609	0.637175	0.80481	105	105
hsa-miR-577	-0.231176	0.0176573	0.0679495	105	105
hsa-miR-579-5p	-0.153372	0.11828	0.275244	105	96
hsa-miR-580-3p	0.0162808	0.869068	0.931212	105	65
hsa-miR-582-3p	0.0651971	0.508754	0.71167	105	105
hsa-miR-582-5p	0.130607	0.18418	0.365398	105	105
hsa-miR-584-3p	0.0781875	0.42789	0.642733	105	74
hsa-miR-584-5p	0.00420145	0.966071	0.983508	105	105
hsa-miR-585-5p	0.263609	0.0065859	0.0335745	105	56
hsa-miR-589-3p	-0.111434	0.257752	0.466881	105	105
hsa-miR-589-5p	-0.0667826	0.498481	0.701276	105	105
hsa-miR-590-3p	-0.0300042	0.76125	0.883658	105	91
hsa-miR-592	-0.244515	0.0119432	0.0517191	105	105
hsa-miR-597-3p	-0.0500392	0.612205	0.787348	105	72
hsa-miR-598-3p	0.223384	0.0219846	0.0802318	105	105
hsa-miR-605-5p	0.211713	0.0301525	0.102477	105	94
hsa-miR-6087	-0.0251795	0.79875	0.896194	105	101
hsa-miR-615-3p	0.177757	0.0696569	0.188742	105	99
hsa-miR-616-3p	0.0119747	0.903501	0.950599	105	75
hsa-miR-616-5p	-0.0508589	0.606383	0.784964	105	103
hsa-miR-618	0.195639	0.0454919	0.139725	105	103
hsa-miR-624-5p	-0.103543	0.293199	0.508726	105	96
hsa-miR-625-3p	-0.175594	0.0731785	0.194553	105	105
hsa-miR-625-5p	-0.174506	0.0750047	0.198873	105	105
hsa-miR-627-3p	0.19849	0.0423758	0.131791	105	102
hsa-miR-627-5p	-0.100936	0.305586	0.521977	105	95
hsa-miR-628-3p	0.24406	0.0121074	0.0517191	105	105
hsa-miR-628-5p	0.262293	0.0068711	0.0348488	105	105
hsa-miR-629-3p	0.0365069	0.711584	0.855111	105	105
hsa-miR-629-5p	-0.146327	0.136359	0.302375	105	105
hsa-miR-636	-0.0935146	0.342697	0.558364	105	100
hsa-miR-641	-0.109784	0.26491	0.476357	105	105
hsa-miR-642a-3p	-0.224568	0.0212739	0.0787278	105	99
hsa-miR-642a-5p	-0.0243146	0.805524	0.896632	105	102
hsa-miR-642b-3p	-0.0356821	0.717822	0.858436	105	102
hsa-miR-642b-5p	-0.224568	0.0212739	0.0787278	105	99
hsa-miR-643	-0.00388911	0.968592	0.983508	105	88
hsa-miR-6500-3p	0.2243	0.0214327	0.0787989	105	92
hsa-miR-6501-3p	0.0341355	0.729569	0.86461	105	64
hsa-miR-6501-5p	0.0165322	0.867065	0.930072	105	96
hsa-miR-6502-5p	0.120509	0.220749	0.418239	105	81
hsa-miR-6503-3p	0.24749	0.0109156	0.0488485	105	104
hsa-miR-6503-5p	0.133774	0.173675	0.35281	105	100
hsa-miR-6504-5p	0.43737	3.08206e-06	4.91638e-05	105	86
hsa-miR-6505-5p	0.0950929	0.334576	0.550268	105	65
hsa-miR-6509-5p	0.131029	0.182751	0.365133	105	58
hsa-miR-651-5p	-0.144323	0.141868	0.309048	105	96
hsa-miR-6510-3p	0.00178169	0.985608	0.993122	105	90
hsa-miR-6511a-3p	0.301273	0.00178971	0.011722	105	105
hsa-miR-6511a-5p	0.0985656	0.317144	0.53412	105	78
hsa-miR-6511b-3p	0.297626	0.00204616	0.0131406	105	104
hsa-miR-6511b-5p	0.0972157	0.323849	0.540497	105	102
hsa-miR-6513-3p	-0.0555128	0.573801	0.76248	105	104
hsa-miR-6513-5p	0.152768	0.119753	0.27672	105	99
hsa-miR-6514-3p	-0.0532523	0.589525	0.769182	105	54
hsa-miR-6514-5p	0.22735	0.01968	0.074573	105	91
hsa-miR-6515-5p	-0.105628	0.283534	0.495433	105	73
hsa-miR-6516-5p	-0.042992	0.663225	0.822998	105	102
hsa-miR-652-3p	-0.0323951	0.742864	0.870488	105	105
hsa-miR-652-5p	-0.0640665	0.516148	0.718972	105	98
hsa-miR-653-3p	-0.128231	0.192359	0.377466	105	59
hsa-miR-654-3p	0.585	5.6321e-11	4.64179e-09	105	105
hsa-miR-654-5p	0.400242	2.33268e-05	0.000277955	105	104
hsa-miR-655-3p	0.112618	0.2527	0.460258	105	80
hsa-miR-655-5p	0.235043	0.0157977	0.0622469	105	70
hsa-miR-656-3p	0.213307	0.0289044	0.0996042	105	87
hsa-miR-659-5p	0.0177055	0.857726	0.924064	105	104
hsa-miR-660-3p	-0.264653	0.00636704	0.0326269	105	103
hsa-miR-660-5p	-0.133757	0.17373	0.35281	105	105
hsa-miR-663a	-0.068931	0.484734	0.692777	105	65
hsa-miR-663b	-0.193139	0.048379	0.146931	105	96
hsa-miR-664a-3p	0.111024	0.259518	0.469219	105	105
hsa-miR-664a-5p	0.201532	0.0392484	0.125215	105	105
hsa-miR-664b-3p	0.148468	0.130655	0.294322	105	104
hsa-miR-664b-5p	0.258473	0.00776186	0.0381744	105	99
hsa-miR-665	0.294043	0.00233003	0.0144931	105	105
hsa-miR-668-3p	0.231244	0.017623	0.0679495	105	104
hsa-miR-671-3p	-0.00981262	0.920862	0.962719	105	105
hsa-miR-671-5p	-0.0616615	0.532053	0.72881	105	104
hsa-miR-6715b-3p	0.0677191	0.492463	0.699779	105	59
hsa-miR-6716-3p	0.425267	6.12192e-06	9.03669e-05	105	105
hsa-miR-6720-3p	0.138631	0.158433	0.331433	105	59
hsa-miR-6723-5p	-0.0650878	0.509467	0.71167	105	83
hsa-miR-6724-5p	-0.024666	0.80277	0.896632	105	103
hsa-miR-6726-3p	0.0257683	0.794147	0.895566	105	78
hsa-miR-6731-3p	-0.0267282	0.786659	0.892454	105	67
hsa-miR-6732-3p	-0.147036	0.134449	0.299483	105	89
hsa-miR-6733-3p	-0.183532	0.0609183	0.172138	105	70
hsa-miR-6734-3p	-0.021824	0.825109	0.907399	105	61
hsa-miR-6734-5p	-0.0944509	0.337865	0.553225	105	90
hsa-miR-6735-3p	0.040683	0.680297	0.833722	105	82
hsa-miR-6735-5p	0.0171466	0.862172	0.927843	105	96
hsa-miR-6737-3p	0.0917623	0.351857	0.567368	105	102
hsa-miR-6741-3p	0.00165614	0.986622	0.993122	105	100
hsa-miR-6742-3p	0.00225402	0.981794	0.991883	105	90
hsa-miR-6747-3p	-0.0149432	0.879741	0.937568	105	104
hsa-miR-6749-3p	0.0366314	0.710644	0.855111	105	76
hsa-miR-675-3p	0.25029	0.0100202	0.0458797	105	95
hsa-miR-675-5p	0.126691	0.197799	0.386607	105	89
hsa-miR-6750-3p	0.123535	0.20929	0.403374	105	86
hsa-miR-6756-3p	0.193094	0.0484323	0.146931	105	91
hsa-miR-676-3p	-0.101938	0.300786	0.515559	105	90
hsa-miR-6761-5p	-0.0209638	0.831899	0.910119	105	93
hsa-miR-6762-3p	0.0815702	0.408112	0.625772	105	96
hsa-miR-6764-3p	0.0749361	0.447408	0.659443	105	62
hsa-miR-6765-3p	-0.114513	0.244751	0.451602	105	59
hsa-miR-6769b-3p	0.125279	0.202882	0.39498	105	102
hsa-miR-6770-3p	0.100122	0.309522	0.525073	105	98
hsa-miR-6772-3p	0.292602	0.00245388	0.015168	105	78
hsa-miR-6774-3p	0.155245	0.113798	0.270545	105	96
hsa-miR-6775-3p	-0.102203	0.299524	0.514287	105	88
hsa-miR-6777-3p	-0.0366923	0.710184	0.855111	105	87
hsa-miR-6783-3p	-0.0476694	0.629172	0.802904	105	85
hsa-miR-6784-3p	-0.164442	0.0936816	0.236355	105	89
hsa-miR-6786-3p	0.135494	0.168158	0.345038	105	89
hsa-miR-6787-3p	0.00815798	0.934173	0.970481	105	71
hsa-miR-6791-3p	-0.0267869	0.786201	0.892454	105	71
hsa-miR-6793-3p	0.0253706	0.797255	0.896194	105	82
hsa-miR-6795-3p	0.214934	0.0276752	0.0963759	105	56
hsa-miR-6797-3p	0.0875449	0.374521	0.590561	105	75
hsa-miR-6798-3p	-0.213521	0.0287397	0.0993831	105	79
hsa-miR-6802-3p	0.0585624	0.552905	0.745256	105	94
hsa-miR-6803-3p	-0.012514	0.899178	0.950599	105	104
hsa-miR-6806-3p	0.0275642	0.780152	0.889931	105	89
hsa-miR-6807-3p	-0.0419947	0.670579	0.826935	105	57
hsa-miR-6810-3p	0.00527441	0.957413	0.982274	105	101
hsa-miR-6811-5p	0.00364609	0.970553	0.98449	105	55
hsa-miR-6812-3p	-0.207567	0.0336148	0.110817	105	89
hsa-miR-6815-5p	0.191774	0.050018	0.150358	105	63
hsa-miR-6817-3p	-0.170299	0.082411	0.213363	105	74
hsa-miR-6818-5p	0.087458	0.374997	0.590561	105	63
hsa-miR-6819-3p	0.0605825	0.539269	0.736012	105	95
hsa-miR-6820-3p	0.034474	0.726993	0.86461	105	58
hsa-miR-6820-5p	-0.0243566	0.805195	0.896632	105	67
hsa-miR-6824-3p	-0.0950206	0.334945	0.550268	105	102
hsa-miR-6833-3p	0.0629019	0.52382	0.724556	105	87
hsa-miR-6836-5p	0.0916899	0.352238	0.567368	105	67
hsa-miR-6837-3p	0.244659	0.0118914	0.0517191	105	98
hsa-miR-6840-5p	-0.148378	0.130892	0.294322	105	69
hsa-miR-6842-3p	0.000156241	0.998738	0.998738	105	105
hsa-miR-6847-5p	-0.0728198	0.460375	0.672542	105	77
hsa-miR-6852-5p	0.161012	0.100827	0.249294	105	104
hsa-miR-6853-3p	0.0931373	0.344656	0.560633	105	89
hsa-miR-6855-3p	-0.215319	0.027391	0.0957234	105	68
hsa-miR-6857-3p	-0.224577	0.0212681	0.0787278	105	82
hsa-miR-6859-5p	0.0193385	0.844761	0.91709	105	99
hsa-miR-6862-5p	0.00494862	0.960041	0.982274	105	54
hsa-miR-6866-5p	0.018826	0.848826	0.917827	105	99
hsa-miR-6868-3p	0.0696029	0.480477	0.688683	105	66
hsa-miR-6870-3p	0.00942741	0.923959	0.963978	105	66
hsa-miR-6873-3p	-0.0856851	0.384792	0.6012	105	61
hsa-miR-6875-5p	0.112337	0.253892	0.460825	105	59
hsa-miR-6877-5p	0.0229991	0.815854	0.900615	105	56
hsa-miR-6879-3p	-0.02873	0.771104	0.889931	105	88
hsa-miR-6880-3p	0.0803012	0.415468	0.633673	105	55
hsa-miR-6882-5p	0.0343668	0.727808	0.86461	105	66
hsa-miR-6885-3p	-0.0008157	0.993411	0.995424	105	61
hsa-miR-6886-3p	-0.0279299	0.77731	0.889931	105	60
hsa-miR-6886-5p	0.067196	0.49582	0.701276	105	75
hsa-miR-6887-3p	-0.102711	0.297115	0.511929	105	91
hsa-miR-6892-5p	0.285909	0.00311051	0.0184209	105	66
hsa-miR-6894-3p	0.0549389	0.577775	0.76393	105	101
hsa-miR-6895-3p	0.0926579	0.347156	0.561927	105	80
hsa-miR-7-1-3p	-0.1469	0.134814	0.29962	105	105
hsa-miR-7-5p	-0.320956	0.000843131	0.0061313	105	105
hsa-miR-708-3p	0.30194	0.0017461	0.0115126	105	101
hsa-miR-708-5p	0.479112	2.33599e-07	5.92383e-06	105	105
hsa-miR-7110-3p	-0.0215112	0.827577	0.907399	105	74
hsa-miR-7111-3p	-0.0533245	0.589019	0.769182	105	73
hsa-miR-7114-3p	-0.0467349	0.635916	0.80426	105	84
hsa-miR-7155-3p	-0.0755171	0.443884	0.657259	105	98
hsa-miR-744-3p	-0.182026	0.0631058	0.174656	105	104
hsa-miR-744-5p	0.0999397	0.310411	0.525678	105	105
hsa-miR-758-3p	0.479299	2.30743e-07	5.92383e-06	105	105
hsa-miR-758-5p	0.157441	0.108714	0.263292	105	64
hsa-miR-760	0.0381027	0.699569	0.846846	105	104
hsa-miR-765	-0.0168727	0.864352	0.92817	105	81
hsa-miR-766-3p	0.155959	0.112126	0.267857	105	105
hsa-miR-766-5p	0.020424	0.836166	0.911762	105	67
hsa-miR-767-5p	0.214209	0.0282176	0.09792	105	83
hsa-miR-769-3p	-0.0715909	0.467999	0.677673	105	105
hsa-miR-769-5p	-0.131308	0.181815	0.364736	105	105
hsa-miR-770-5p	0.326515	0.000675337	0.00513776	105	84
hsa-miR-7702	0.0825622	0.402416	0.622435	105	58
hsa-miR-7703	-0.174329	0.0753049	0.199135	105	91
hsa-miR-7704	0.117811	0.231334	0.434635	105	105
hsa-miR-7705	0.0275833	0.780004	0.889931	105	103
hsa-miR-7706	-0.0676031	0.493206	0.69983	105	105
hsa-miR-7845-5p	0.398696	2.52486e-05	0.000297272	105	58
hsa-miR-7846-3p	0.0609681	0.536685	0.734138	105	91
hsa-miR-7854-3p	0.087908	0.372536	0.5895	105	77
hsa-miR-7974	-0.129395	0.188317	0.37027	105	105
hsa-miR-7976	0.123976	0.207657	0.401903	105	75
hsa-miR-7977	-0.0758924	0.441616	0.656779	105	105
hsa-miR-873-3p	0.359573	0.00016507	0.00149232	105	94
hsa-miR-873-5p	0.482235	1.89908e-07	5.0762e-06	105	95
hsa-miR-874-3p	0.315959	0.00102563	0.00735033	105	105
hsa-miR-874-5p	0.467974	4.8095e-07	1.05702e-05	105	105
hsa-miR-877-3p	0.00192863	0.984421	0.993122	105	98
hsa-miR-877-5p	0.146034	0.137154	0.303456	105	105
hsa-miR-885-5p	0.242466	0.012699	0.0523506	105	63
hsa-miR-887-3p	0.518779	1.43414e-08	6.01227e-07	105	105
hsa-miR-887-5p	0.46323	6.49133e-07	1.33748e-05	105	103
hsa-miR-889-3p	0.325147	0.00071353	0.00534607	105	105
hsa-miR-889-5p	0.129855	0.18674	0.369321	105	58
hsa-miR-891a-5p	0.250909	0.00983101	0.0456473	105	91
hsa-miR-9-5p	0.230431	0.0180363	0.069139	105	105
hsa-miR-92a-1-5p	-0.138196	0.159757	0.333262	105	105
hsa-miR-92a-3p	-0.207267	0.0338773	0.111311	105	105
hsa-miR-92b-3p	-0.0348191	0.724369	0.86461	105	105
hsa-miR-92b-5p	-0.0605416	0.539544	0.736012	105	105
hsa-miR-93-3p	-0.191147	0.0507863	0.151677	105	105
hsa-miR-93-5p	-0.242271	0.0127731	0.0524173	105	105
hsa-miR-935	-0.0188179	0.84889	0.917827	105	104
hsa-miR-937-3p	0.028465	0.773158	0.889931	105	104
hsa-miR-939-3p	-0.0057325	0.953718	0.982274	105	59
hsa-miR-939-5p	-0.138934	0.157518	0.331433	105	95
hsa-miR-940	0.0253627	0.797318	0.896194	105	105
hsa-miR-941	-0.123503	0.209408	0.403374	105	105
hsa-miR-942-3p	-0.100524	0.307574	0.523564	105	64
hsa-miR-942-5p	-0.198686	0.042168	0.131559	105	105
hsa-miR-943	-0.0992828	0.313618	0.529297	105	99
hsa-miR-95-3p	-0.192812	0.0487676	0.147496	105	105
hsa-miR-96-5p	-0.253308	0.0091278	0.0431933	105	105
hsa-miR-98-3p	-0.043803	0.657269	0.816631	105	96
hsa-miR-98-5p	-0.0275963	0.779903	0.889931	105	105
hsa-miR-99a-3p	0.633279	4.19561e-13	1.05221e-10	105	104
hsa-miR-99a-5p	0.618559	2.04313e-12	3.36776e-10	105	105
hsa-miR-99b-3p	0.385167	4.96574e-05	0.000522459	105	105
hsa-miR-99b-5p	0.39507	3.0356e-05	0.000349094	105	105
